# Supplementary material for: Abundantly expressed class of noncoding RNAs conserved through the multicellular evolution of dictyostelid social amoebas
Source: Genome Res. 2021 Mar;31(3):436–47. doi: 10.1101/gr.272856.120 (PMC7919456; doi:10.1101/gr.272856.120)
Supplement: Supplemental Material [file supp_gr.272856.120_Supplemental_Table_S1.xlsx]

## Sheet: Info
Supplemental Table S1. Genomic resources used in this study.
References for dictyostelid genomic sequences used in the study together with alternative names (synonyms) for organisms (where applicable) and basic genome sequence statistics. Genome sequences used in the construction of the co-variance model (CM) are indicated in bold. For outgroup genome sequences used in the study, only the GenBank or RefSeq reference are given.

## Sheet: Genomic resources
	Name	Synonym	GenBank assembly accession	GC %	Undetermined bases %	Assembly level	No scaffolds/contigs	Genome size (Mbp)	scaffold/contig size range (kbp)
Dictyostelia genomes	Dictyostelium discoideum		*	22.4363	0.0781696	chromosome/scaffold	11	34.3381	16.7-8484.2
	Dictyostelium citrinum		GCA_000286055.1	19.5637	22.3932	scaffold	1772	26.2518	2.0-130.9
	Dictyostelium intermedium		GCA_000277465.1	22.2553	10.3969	scaffold	3111	30.5295	2.0-133.1
	Dictyostelium firmibasis		GCA_000277485.1	21.4323	13.4577	scaffold	997	30.5597	0.5-621.9
	Dictyostelium purpureum		*	24.4562	0.385603	scaffold	838	33.236	0.8-285.2
	Polysphondylium violaceum		GCA_000277445.1	31.8255	0.000392639	contig	1228	25.7234	2.0-175.9
	Dictyostelium lacteum	Tieghemostelium lacteum	GCA_001606155.1	29.7738	0	contig	54	23.3757	2.2-2033.6
	Dictyostelium caveatum	Speleostelium caveatum	GCA_003667305.1	27.6569	5.1703	scaffold	2180	30.9522	0.2-208.2
	Dictyostelium polycephalum	Coremiostelium polycephalum	GCA_900092265.1	38.0295	0.423677	scaffold	7774	48.621	0.2-624.9
	Polysphondylium pallidum	Heterostelium album	GCA_000004825.1	32.0709	0.00636939	scaffold	43	32.9702	3.7-3242.5
	Acytostelium subglobosum		GCA_000787575.2	44.1942	0.084092	scaffold	106	31.003	2.3-1840.1
	Acytostelium leptosomum		GCA_900092245.1	49.2078	0.634988	scaffold	28227	57.2568	0.2-971.3
	Acytostelium ellipticum	Rostrostelium ellipticum	GCA_900092235.1	54.6084	0.169792	scaffold	10327	62.1602	0.2-879.7
	Dictyostelium polycarpum	Synstelium polycarpum	GCA_900092255.1	48.0745	0.258244	scaffold	14005	62.2201	0.2-772.3
	Dictyostelium fasciculatum	Cavenderia fasciculata	GCA_000203815.1	33.8296	0.00322381	scaffold	25	31.0192	5.3-4166.8
	Dictyostelium deminutivum	Cavenderia deminutiva	GCA_900092275.1	43.2027	0.47498	scaffold	13382	45.8015	0.2-924.1
Outgroup genomes	Physarym polycephalum		GCA_000413255.3
	Protostelium mycophagum		GCA_002081555.1
	Protostelium fungivorum		GCA_003024175.1
	Entamoeba histolytica		GCA_000208925.2
	Acanthamoeba lenticulata		GCA_002025285.1
	Acanthamoeba castellanii		GCA_000313135.1
	Saccharomyces cerevisiae		GCF_000146045.2
	Fonticula alba		GCA_000388065.2
	Capsaspora owczarzaki		GCA_000151315.2
	Caenorhabditis elegans		GCF_000002985.6
	Arabidopsis thaliana		GCA_000001735.2
	Myxococcus xanthus		GCA_000012685.1
			*accessed from www.dictybase.org
