# Supplementary material for: Abundantly expressed class of noncoding RNAs conserved through the multicellular evolution of dictyostelid social amoebas
Source: Genome Res. 2021 Mar;31(3):436–47. doi: 10.1101/gr.272856.120 (PMC7919456; doi:10.1101/gr.272856.120)
Supplement: Supplemental Material [file supp_gr.272856.120_Supplemental_Table_S2.xlsx]

## Sheet: Info
Supplemental Table S2. Search summary and expression validation for Class I RNAs from selected dictyostelids.
The spreadsheet show data for all predicted Class I RNAs, from respective organism, passing the CM score ≥ 15. Candidates considered to be true Class I RNAs have been named according to previous naming rules. Classifier summary includes classifier score and infernal (CM) score as well as identified DUSE sequence (DUSE_seq), the duse score obtained from FIMO (duse_score), the duse distance from th…

## Sheet: D. discoideum
		Classifier summary									Read counts						Expression validation
Class I RNA candidate	Name	classifier score	CM score	DUSE_seq	duse_score	duse_dist	TGTG-box_seq	TGTG-box_score	TGTG-box_dist	inter_dist	Ddi_0h_A	Ddi_0h_B	Ddi_4h_A	Ddi_4h_B	Ddi_8h_A	Ddi_8h_B	Read coverage	Northern blot	Note
r59	DdR-59	74.3737	56.9	TCCCACAA	12.4737	75	AAATGTG	13.5714	14	61	3416	4163	5447	7833	6938	6669	1
r22	DdR-22	74.1816	55.3	TCCCATAA	13.8816	70	AAATGTG	13.5714	13	57	300526	392675	402644	575264	458238	422704	1
r30	DdR-30	72.9816	54.1	TCCCATAA	13.8816	72	AGATGTG	3.7449	13	59	194666	209098	377262	518737	428824	462267	1
r33	DdR-33	70.2816	51.4	TCCCATAA	13.8816	72	TGATGTG	0	13	59	397222	503783	673894	838057	690565	705935	1
r23C	DdR-23C	69.3816	50.5	TCCCATAA	13.8816	73	AAATGTG	13.5714	13	60	331423	363049	475329	629367	538070	567667	1		Identical sequence to DdR-23A/B
r23A	DdR-23A	69.3816	50.5	TCCCATAA	13.8816	73	AAATGTG	13.5714	13	60	332258	364550	473008	629186	539043	566977	1		Identical sequence to DdR-23B/C
r28	DdR-28	69.0816	50.2	TCCCATAA	13.8816	73	TGATGTG	0	14	59	142863	152307	180531	247812	198466	206232	1
r60	DdR-60	68.6737	51.2	TCCCACAA	12.4737	74	AAATGTG	13.5714	14	60	543127	682156	989188	1555072	1243832	1230124	1
r56	DdR-56	67.5921	54	ACCCAAAA	8.59211	88	AAATGTG	13.5714	28	60	223	251	262	377	299	300	1
r24A	DdR-24A	67.2737	49.8	TCCCACAA	12.4737	70	AAATGTG	13.5714	10	60	122819	137045	223429	323133	253009	254436	1		Identical sequence to DdR-24B
r24B	DdR-24B	67.2737	49.8	TCCCACAA	12.4737	73	AAATGTG	13.5714	13	60	42940	47712	76585	110523	87054	87607	1		Identical sequence to DdR-24A
r41	DdR-41	66.8737	49.4	TCCCACAA	12.4737	86	TAATGTG	3.7449	26	60	3752	3454	7265	10110	7815	9596	1
r26	DdR-26	66.6737	49.2	TCCCACAA	12.4737	70	AAATGTG	13.5714	10	60	127566	147297	224444	326747	264867	249280	1
r29	DdR-29	65.5737	48.1	TCCCACAA	12.4737	85	AAATGTG	13.5714	24	61	41922	41340	55284	76311	62995	69121	1
r25	DdR-25	64.9737	47.5	TCCCACAA	12.4737	73	TAATGTG	3.7449	13	60	146766	157556	233520	329491	267267	272522	1
r23B	DdR-23B	64.9605	50.5	TCCCATAT	9.46053	72	AAATGTG	13.5714	13	59	334157	364064	472096	630642	537580	572492	1		Identical sequence to DdR-23A/C
r31	DdR-31	64.4816	46.1	ACCCATAA	13.3816	70	TAATGTG	3.7449	11	59	561763	713293	774003	979132	898436	937144	1
r32	DdR-32	64.3737	46.9	TCCCACAA	12.4737	87	TAATGTG	3.7449	27	60	51891	59303	63741	87902	73639	77104	1
r34	DdR-34	62.5737	45.1	TCCCACAA	12.4737	75	AAATGTG	13.5714	15	60	37396	38320	47637	61549	46241	52185	1
r51	DdR-51	61.4737	44	TCCCACAA	12.4737	89	AAATGTG	13.5714	29	60	3323	3630	5527	8213	1369	1434	1
r21	DdR-21	60.4737	43	TCCCACAA	12.4737	90	AAATGTG	13.5714	29	61	811952	1067245	1282693	1789186	1598203	1456328	1
r47	DdR-47	60.2737	42.8	TCCCACAA	12.4737	84	AAATGTG	13.5714	23	61	39689	60057	69268	121606	88883	77962	1
r49	DdR-49	60.2737	42.8	TCCCACAA	12.4737	72	AAATGTG	13.5714	13	59	209	294	2594	2872	1828	1941	1
r52	DdR-52	59.6737	42.2	TCCCACAA	12.4737	71	AAATGTG	13.5714	11	60	16734	19997	103299	160110	101665	109354	1
r46	DdR-46	59.3737	41.9	TCCCACAA	12.4737	74	AAATGTG	13.5714	13	61	80292	66586	172784	219796	200322	207455	1
r36	DdR-36	58.7816	39.9	TCCCATAA	13.8816	60	N/A	0	0	60	79233	93470	115049	143784	147465	142199	1
r35	DdR-35	56.6816	37.8	TCCCATAA	13.8816	58	N/A	0	0	58	77909	88719	122516	148163	156702	155649	1
r42	DdR-42	56.1737	38.7	TCCCACAA	12.4737	60	AAATGTT	3.45918	91	-31	61	62	462	606	570	599	1
r62	DdR-62	51.2737	33.8	TCCCACAA	12.4737	69	AAATGTG	13.5714	11	58	0	0	10	9	4	3	0
r54		43.8737	26.4	TCCCACAA	12.4737	79	AAATGTG	13.5714	20	59	2	0	0	0	0	0	0
ddi_can_399	DdR-64	41.7816	23.4	ACCCATAA	13.3816	68	TAATGTG	3.7449	8	60	0	0	0	0	0	0	0
r45	DdR-45	41.6842	40	TACCACAT	6.68421	7	AAATGTG	13.5714	33	-26	0	0	0	1	0	3	0
r44	DdR-44	40.1737	32.7	TCCCACAA	12.4737	67	N/A	0	0	67	1617	1657	2833	3610	3009	3146	1
ddi_can_357	DdR-65	39.8737	22.4	TCCCACAA	12.4737	57	N/A	0	0	57	135	166	330	468	500	577	1
r57	DdR-57	39.6921	25.6	TCCCAAAA	9.09211	70	AAATGTG	13.5714	10	60	0	0	0	0	0	0	0
ddi_can_269	DdR-66	39.0816	20.7	ACCCATAA	13.3816	56	N/A	0	0	56	86	104	445	578	901	684	1
r50	DdR-50	36.8921	46.3	AACCATTT	-4.40789	25	AAATGTG	13.5714	13	12	69	71	114	111	117	96	1
ddi_can_429	DdR-67	36.2816	17.9	ACCCATAA	13.3816	57	AAATATG	3.45918	9	48	105	126	212	255	134	104	1
ddi_can_305		32.0921	19.5	AACCATAT	7.59211	58	N/A	0	0	58	1	0	0	0	0	0	0
ddi_can_398		30.1053	24.5	AACCACAA	10.6053	94	GAAGGTG	0	0	94	0	1	0	0	0	0	0
ddi_can_459		28.9816	17.1	ATCCATAA	6.88158	60	AAATATG	3.45918	0	60	0	0	0	0	0	0	0
ddi_can_139		27.4132	16.4	TACCATCA	6.01316	57	CAATGGG	0	79	-22	0	0	0	0	0	0	0
r43		26.6	31.6	AACCTTAA	0	81	AAATTTG	3.45918	76	5	0	0	0	0	0	0	0
ddi_can_405		26.1132	20.6	TACCATTA	0.513158	56	N/A	0	0	56	0	0	0	0	0	0	0
ddi_can_131		25.979	24.9	TACCATAG	6.07895	132	AAATTTG	3.45918	13	119	0	0	0	0	0	0	0
ddi_can_227		25.5132	18.5	AACCATAA	12.0132	9	GAAGGTG	0	17	-8	0	0	0	0	0	0	0
ddi_can_1		25.2158	31.9	AATCACAA	-1.68421	8	AAATGTG	13.5714	21	-13	0	0	0	0	0	0	0
ddi_can_230		25.1132	18.1	AACCATAA	12.0132	73	N/A	0	0	73	0	0	0	0	0	0	0
ddi_can_5		25.0053	15.9	AACCACCA	4.10526	109	ATTTGTG	0	45	64	1	0	2	2	2	1	0
ddi_can_233		24.9053	18.8	TACCACAA	11.1053	53	AAATGTC	3.45918	38	15	0	1	0	0	0	0	0
ddi_can_420		24.2053	18.6	AACCACAA	10.6053	114	N/A	0	0	114	0	0	0	0	0	0	0
ddi_can_141		23.9921	21.4	AACCATAT	7.59211	49	AAATTTG	3.45918	1	48	0	0	0	0	0	0	0
ddi_can_469		23.7132	16.7	GACCAAAA	2.01316	59	ATATGGG	0	104	-45	0	0	0	0	0	0	0
ddi_can_468		23.6737	16.7	ACCCACAA	11.9737	76	AGAAGTG	0	31	45	0	0	0	0	0	0	0
ddi_can_496		23.5132	16	TACCATAA	12.5132	101	AATTGGG	0	91	10	0	0	0	0	0	0	0
ddi_can_347		23.3053	17.7	AACCACAA	10.6053	14	AAATATG	3.45918	51	-37	0	0	0	0	0	0	0
ddi_can_514		23.2132	15.7	TACCATAA	12.5132	75	ACATGAG	0	118	-43	0	0	0	0	0	0	0
ddi_can_409		22.8237	20.1	TACCAAAA	7.72368	88	AAAGGTG	3.7449	69	19	0	0	0	0	0	0	0
ddi_can_166		22.7921	15.2	TTCCAAAA	2.59211	56	N/A	0	0	56	0	0	0	0	0	0	0
ddi_can_353		22.7132	15.7	AACCATAA	12.0132	86	N/A	0	0	86	0	0	0	0	0	0	0
ddi_can_519		22.5737	15.6	ACCCACAA	11.9737	41	N/A	0	0	41	0	0	0	0	0	0	0
ddi_can_284		22.4132	15.4	AACCATAA	12.0132	106	AAACGTG	3.7449	52	54	0	0	0	0	0	0	0
ddi_can_285		22.4132	15.4	AACCATAA	12.0132	108	AAACGTG	3.7449	54	54	0	0	0	0	0	0	0
ddi_can_194		22.3237	20.1	AACCAAAA	7.22368	141	N/A	0	0	141	0	0	0	0	0	0	0
ddi_can_2		22.2842	27.1	TCCTACAA	0.184211	89	AAATTTG	3.45918	43	46	0	0	0	0	0	0	0
ddi_can_475		22.1053	16.5	AACCACAA	10.6053	83	N/A	0	0	83	0	0	0	0	0	0	0
ddi_can_272		21.6237	18.9	TACCAAAA	7.72368	36	AAAGGTG	3.7449	101	-65	0	0	0	0	0	0	0
ddi_can_535		21.5053	15.4	TACCACAA	11.1053	93	N/A	0	0	93	0	0	0	0	0	0	0
ddi_can_513		21.3053	15.7	AACCACAA	10.6053	86	GAAAGTG	0	53	33	0	0	0	0	0	0	0
ddi_can_295		20.9605	17	ACCCATAT	8.96053	141	N/A	0	0	141	0	0	0	0	0	0	0
ddi_can_296		20.9605	17	ACCCATAT	8.96053	139	N/A	0	0	139	0	0	0	0	0	0	0
ddi_can_419		20.9237	18.7	AACCAAAA	7.22368	125	AATTGTG	3.7449	72	53	0	0	0	2	0	0	0
ddi_can_465		20.8605	16.9	ACCCATAT	8.96053	116	AAATGTA	3.45918	99	17	0	0	0	0	0	0	0
ddi_can_444		20.8158	17.5	AACAACAA	-1.68421	62	AAAAGAG	0	34	28	0	0	0	0	0	0	0
ddi_can_96		20.6026	15.3	CACCATCA	0.302632	59	ACAAGTG	0	110	-51	0	0	0	0	0	0	0
ddi_can_503		20.3605	15.9	TCCCATAT	9.46053	41	ATAAGTG	0	83	-42	0	0	0	0	0	0	0
ddi_can_435		20.2921	17.7	AACCATAT	7.59211	133	AAAGGTG	3.7449	88	45	0	0	0	0	0	0	0
ddi_can_317		20.2921	17.2	TACCATAT	8.09211	102	AATGGTG	0	34	68	0	0	0	0	0	0	0
ddi_can_313		20.2053	20.6	TACCACCA	4.60526	38	AAATGGG	3.7449	75	-37	0	0	0	0	0	0	0
ddi_can_438		19.9816	17.6	TTCCATAA	7.38158	18	AAAGGTG	3.7449	133	-115	0	0	0	0	0	0	0
ddi_can_439		19.8237	17.6	AACCAAAA	7.22368	16	N/A	0	0	16	0	0	0	0	0	0	0
ddi_can_473		19.5921	16.5	TACCATAT	8.09211	55	N/A	0	0	55	0	0	0	0	0	0	0
ddi_can_539		19.4921	15.4	TCCCAAAA	9.09211	117	AATTGTG	3.7449	112	5	0	0	0	0	0	0	0
ddi_can_407		19.3711	20.2	ACCCAAAT	4.17105	124	TAATGAG	0	111	13	0	0	0	0	0	0	0
ddi_can_209		19.3132	18.8	AACCATCA	5.51316	115	N/A	0	0	115	0	0	0	0	0	0	0
ddi_can_533		19.2158	15.4	TACTACAA	-1.18421	56	N/A	0	0	56	0	0	0	0	0	0	0
ddi_can_472		18.7237	16.5	AACCAAAA	7.22368	76	N/A	0	0	76	0	0	0	0	0	0	0
ddi_can_492		18.6921	16.1	AACCATAT	7.59211	140	AAATGTA	3.45918	17	123	0	0	0	0	0	0	0
ddi_can_155		18.6605	21.2	ATCCATAT	2.46053	70	N/A	0	0	70	0	0	0	0	0	0	0
ddi_can_104		18.5237	23.8	AATCATAA	-0.276316	102	AAAAGAG	0	83	19	0	0	0	0	0	0	0
ddi_can_3		18.5237	23.8	AAACATAA	-0.276316	81	N/A	0	0	81	0	0	0	0	0	0	0
ddi_can_400		18.4711	21.8	GTCCATAA	1.67105	136	CAATGGG	0	17	119	0	0	0	0	0	0	0
ddi_can_508		18.3921	15.8	AACCATAT	7.59211	141	CATTGTG	0	68	73	0	0	0	0	0	0	0
ddi_can_553		18.0237	15.3	TACCAAAA	7.72368	40	N/A	0	0	40	0	0	0	0	0	0	0
ddi_can_359		17.9026	20.1	AACCAAAT	2.80263	44	N/A	0	0	44	0	0	0	0	0	0	0
ddi_can_223		17.5132	16.5	TACCATCA	6.01316	95	AATTGTG	3.7449	68	27	0	0	0	0	0	0	0
ddi_can_366		17.5053	17.9	TACCACCA	4.60526	89	CATTGTG	0	41	48	0	0	0	0	0	0	0
ddi_can_426		17.4711	18.3	AACCACAG	4.17105	88	N/A	0	0	88	2	0	1	1	7	0	0
ddi_can_83		17.3895	21.6	AACCAAAG	0.789474	119	AACAGTG	0	74	45	0	0	0	0	0	0	0
ddi_can_458		17.3237	17.1	AACCAATA	-4.77632	64	AAAAGTG	3.7449	9	55	0	0	0	0	0	0	0
ddi_can_404		17.2921	20.7	TCCAATAA	1.59211	4	N/A	0	0	4	0	0	0	1	0	0	0
ddi_can_236		17.271	18.1	ACCCAAAT	4.17105	105	N/A	0	0	105	0	0	0	0	0	0	0
ddi_can_391		17.1816	15.3	ATCCATAA	6.88158	70	AAATTTG	3.45918	34	36	0	0	0	0	0	0	0
ddi_can_392		17.1816	15.3	ATCCATAA	6.88158	72	AAATTTG	3.45918	36	36	0	0	0	0	0	0	0
ddi_can_406		17.1711	20.5	CTCCATAA	1.67105	116	N/A	0	0	116	0	0	0	0	0	0	0
ddi_can_394		17.0816	15.2	ATCCATAA	6.88158	103	AAATTTG	3.45918	112	-9	0	0	0	0	0	0	0
ddi_can_501		16.9132	15.9	TACCATCA	6.01316	123	TAAAGTG	0	43	80	0	0	0	0	0	0	0
ddi_can_498		16.9132	15.9	TACCATCA	6.01316	134	AAATGAG	3.7449	103	31	0	0	0	0	0	0	0
ddi_can_340		16.9026	15.1	CACCATAA	6.80263	14	N/A	0	0	14	0	0	0	0	0	0	0
ddi_can_229		16.7237	22	AACAATAA	-0.276316	6	N/A	0	0	6	0	0	0	0	0	0	0
ddi_can_249		16.7132	19.7	CACCAAAA	2.01316	141	AAATGTG	13.5714	21	120	0	1	0	0	1	0	0
ddi_can_512		16.7132	15.7	TACCATCA	6.01316	49	GATTGTG	0	76	-27	0	0	0	0	0	0	0
ddi_can_328		16.7132	15.7	TACCATCA	6.01316	130	ATATGTG	3.7449	19	111	0	0	0	0	0	0	0
ddi_can_361		16.5921	19.5	ATCCAAAA	2.09211	121	N/A	0	0	121	0	0	0	0	0	0	0
ddi_can_308		16.5237	21.3	TATCATAA	0.223684	98	AAATTTG	3.45918	46	52	0	0	0	0	0	0	0
ddi_can_378		16.5053	16.9	TACCACCA	4.60526	76	AAATTTG	3.45918	24	52	0	0	0	0	0	0	0
ddi_can_502		16.3737	15.9	ATCCACAA	5.47368	117	TAATGGG	0	82	35	0	0	0	0	0	0	0
ddi_can_274		16.3053	16.7	TACCACCA	4.60526	94	GATTGTG	0	123	-29	0	0	0	0	0	0	0
ddi_can_594		16.1842	15	AACCACAT	6.18421	78	AAATATG	3.45918	23	55	0	0	0	0	0	0	0
ddi_can_418		16.0816	18.7	CACCATAT	2.38158	34	AATTGTG	3.7449	96	-62	0	0	0	0	0	0	0
ddi_can_463		16.0053	16.9	AACCACCA	4.10526	39	AAATGTA	3.45918	91	-52	0	0	0	1	0	0	0
ddi_can_464		16.0053	16.9	AACCACCA	4.10526	97	CAATGGG	0	48	49	0	0	0	0	6	0	0
ddi_can_277		15.8921	16.3	ATTCATAA	-5.40789	61	AGATGAG	0	141	-80	0	0	0	0	0	0	0
ddi_can_583		15.6132	15.1	AACCATCA	5.51316	121	N/A	0	0	121	0	0	0	0	0	0	0
ddi_can_491		15.6132	16.1	CATCATAA	-5.48684	84	ATTTGTG	0	21	63	0	0	0	0	0	0	0
ddi_can_432		15.6026	17.8	AACCAAAT	2.80263	115	AAATGGG	3.7449	2	113	0	0	0	0	0	0	0
ddi_can_311		15.4921	19.4	ACGCATAA	1.09211	96	N/A	0	0	96	0	0	0	0	0	0	0
ddi_can_425		15.4921	18.4	ACCCAACA	2.09211	83	AAAGGTG	3.7449	113	-30	0	0	0	0	0	0	0
ddi_can_363		15.2711	18.6	GTCCATAA	1.67105	11	ACATGGG	0	132	-121	0	0	0	0	0	0	0
ddi_can_388		15.0053	15.4	TACCACCA	4.60526	131	N/A	0	0	131	0	0	0	0	0	0	0
ddi_can_372		15.0026	17.2	AACCAAAT	2.80263	102	N/A	0	0	102	0	0	0	0	0	0	0
ddi_can_523		14.9737	15.5	CACCACCT	-5.52632	86	CAAGGTG	0	28	58	0	0	0	0	0	0	0
ddi_can_401		14.9158	21.6	AACAACAA	-1.68421	54	N/A	0	0	54	0	0	0	0	0	0	0
ddi_can_358		14.9158	21.1	TACAACAA	-1.18421	74	AAATGTT	3.45918	108	-34	0	0	0	0	0	0	0
ddi_can_370		14.8921	17.8	ATCCAAAA	2.09211	88	GAATGGG	0	138	-50	0	0	0	0	0	0	0
ddi_can_396		14.7711	15.1	TCCCAAAT	4.67105	66	N/A	0	0	66	0	0	0	0	0	0	0
ddi_can_577		14.7053	15.1	TACCACCA	4.60526	89	N/A	0	0	89	0	0	0	0	0	0	0
ddi_can_422		14.5921	18.5	AACCATCT	1.09211	19	CAATGTG	3.7449	0	19	0	0	0	0	0	0	0
ddi_can_228		14.5237	19.8	AACTATAA	-0.276316	75	N/A	0	0	75	0	0	0	0	0	0	0
ddi_can_356		14.4789	15.4	TACCATTG	-5.92105	57	N/A	0	0	57	0	0	0	0	0	0	0
ddi_can_321		14.4053	15.3	AACCACCA	4.10526	27	AATGGTG	0	5	22	0	0	0	0	0	0	0
ddi_can_271		14.3921	18.3	ACTCATAA	1.09211	98	N/A	0	0	98	0	0	0	0	0	0	0
ddi_can_251		14.3026	16.5	AACCAAAT	2.80263	98	AAATGTA	3.45918	139	-41	0	0	0	0	0	0	0
ddi_can_427		14.2237	18	TACCAACA	1.22368	23	N/A	0	0	23	0	0	0	0	0	0	0
ddi_can_289		14.2026	15.9	TACCAAAT	3.30263	41	AAGTGAG	0	52	-11	0	0	0	0	0	0	0
ddi_can_349		14.1684	18.8	CACCATAG	0.368421	101	N/A	0	0	101	0	0	0	0	0	0	0
ddi_can_282		14.1526	18.1	ATCCACAT	1.05263	47	N/A	0	0	47	0	0	0	0	0	0	0
ddi_can_424		14	18.5	TACCTTAA	0.5	133	N/A	0	0	133	0	0	0	0	0	0	0
ddi_can_232		13.7921	16.2	TTCCAAAA	2.59211	68	AAATCTG	3.45918	43	25	0	0	0	0	0	0	0
ddi_can_307		13.6816	23.3	TTCCATGA	-4.61842	2	N/A	0	0	2	0	0	0	0	0	0	0
ddi_can_515		13.6605	15.7	TTCCATAT	2.96053	112	AAATGGG	3.7449	92	20	0	0	0	0	0	0	0
ddi_can_346		13.6158	20.3	AACAACAA	-1.68421	6	N/A	0	0	6	0	0	2	1	0	0	0
ddi_can_350		13.5816	16.2	CACCATAT	2.38158	14	AAATGTA	3.45918	136	-122	0	0	0	0	0	0	0
ddi_can_351		13.5816	16.2	CACCATAT	2.38158	12	AAATGTA	3.45918	134	-122	0	0	0	0	0	0	0
ddi_can_474		13.5132	16.5	CACCAAAA	2.01316	8	N/A	0	0	8	0	1	0	0	0	0	0
ddi_can_566		13.5026	15.2	TACCAAAT	3.30263	74	N/A	0	0	74	0	0	0	0	0	0	0
ddi_can_573		13.5026	15.2	TACCAAAT	3.30263	0	N/A	0	0	0	0	0	0	0	0	0	0
ddi_can_147		13.4816	18.1	ATCCATCA	0.381579	140	N/A	0	0	140	0	0	0	0	0	0	0
ddi_can_119		13.4237	18.7	AACTATAA	-0.276316	93	N/A	0	0	93	0	0	0	0	0	0	0
ddi_can_403		13.3921	20.8	CACCAAAT	-2.40789	3	N/A	0	0	3	0	0	0	0	0	0	0
ddi_can_455		13.3237	17.1	TACCAACA	1.22368	131	ATATGAG	0	97	34	0	0	1	0	0	1	0
ddi_can_327		13.3132	17.8	TACCATTA	0.513158	71	AAATGTA	3.45918	40	31	0	0	0	0	0	0	0
ddi_can_591		13.3026	15	TACCAAAT	3.30263	65	AAATTTG	3.45918	75	-10	0	0	0	0	0	0	0
ddi_can_315		13.2605	19.3	CACCACAG	-1.03947	15	N/A	0	0	15	0	0	0	0	0	0	0
ddi_can_367		13.1842	18	TCCAACAA	0.184211	115	AAATTTG	3.45918	93	22	0	0	0	0	0	0	0
ddi_can_479		13.071	16.4	CTCCATAA	1.67105	132	N/A	0	0	132	0	0	0	0	0	0	0
ddi_can_440		13.0605	17.6	TCCCTCAA	0.460526	25	AAATGTA	3.45918	88	-63	0	0	0	0	0	0	0
ddi_can_437		13.0342	17.6	AACCAGAA	0.434211	89	N/A	0	0	89	0	0	0	0	0	0	0
ddi_can_365		13.0237	18.3	AACGATAA	-0.276316	88	N/A	0	0	88	0	0	0	0	1	0	0
ddi_can_364		13.0237	18.3	AACGATAA	-0.276316	90	N/A	0	0	90	0	0	0	0	0	0	0
ddi_can_238		13.0026	15.2	AACCAAAT	2.80263	105	N/A	0	0	105	0	0	0	0	0	0	0
ddi_can_279		13.0026	15.2	AACCAAAT	2.80263	44	N/A	0	0	44	0	0	0	0	0	0	0
ddi_can_354		12.9921	15.4	TTCCAAAA	2.59211	92	AATTGTG	3.7449	19	73	0	0	0	0	0	0	0
ddi_can_579		12.9026	15.1	AACCAAAT	2.80263	140	AAGTGAG	0	104	36	0	0	0	0	0	2	0
ddi_can_389		12.8921	15.3	TTCCAAAA	2.59211	66	N/A	0	0	66	0	0	0	0	0	0	0
ddi_can_442		12.8684	17.5	GACCATAG	0.368421	103	N/A	0	0	103	0	0	0	0	0	0	0
ddi_can_504		12.8132	15.8	GACCAAAA	2.01316	42	AAATGTC	3.45918	143	-101	0	0	1	0	0	0	0
ddi_can_571		12.7921	15.2	TTCCAAAA	2.59211	50	AAATGTT	3.45918	46	4	0	0	0	0	0	0	0
ddi_can_572		12.7921	15.2	TTCCAAAA	2.59211	48	AAATGTT	3.45918	44	4	0	0	0	0	0	0	0
ddi_can_556		12.7605	15.3	ATCCATAT	2.46053	92	ACATGTG	3.7449	64	28	0	0	0	0	0	0	0
ddi_can_250		12.7237	16.5	TACCAACA	1.22368	85	N/A	0	0	85	0	0	0	0	0	0	0
ddi_can_545		12.6816	15.3	CACCATAT	2.38158	50	AAATGTA	3.45918	112	-62	0	0	0	0	0	0	0
ddi_can_517		12.6132	15.6	CACCAAAA	2.01316	5	N/A	0	0	5	0	0	0	0	0	0	0
ddi_can_483		12.5895	16.3	TACCAAAG	1.28947	122	AAATGTA	3.45918	89	33	0	0	0	0	0	0	0
ddi_can_431		12.5237	17.8	AACAATAA	-0.276316	76	N/A	0	0	76	0	0	0	0	0	0	0
ddi_can_430		12.5237	17.8	AACAATAA	-0.276316	74	N/A	0	0	74	0	0	0	0	0	0	0
ddi_can_486		12.4895	16.2	TACCAAAG	1.28947	36	AATTGAG	0	117	-81	0	0	0	0	0	0	0
ddi_can_436		12.4237	17.7	AAACATAA	-0.276316	73	TAAAGTG	0	97	-24	0	1	0	2	2	0	0
ddi_can_164		12.4132	15.4	CACCAAAA	2.01316	134	N/A	0	0	134	0	0	0	0	0	0	0
ddi_can_557		12.3132	15.3	CACCAAAA	2.01316	13	N/A	0	0	13	0	0	0	0	0	0	0
ddi_can_377		12.3026	17	CACCATCA	0.302632	44	AACGGTG	0	119	-75	0	0	0	0	0	0	0
ddi_can_536		12.2816	15.4	TCCCATTA	1.88158	92	N/A	0	0	92	0	0	0	0	0	0	0
ddi_can_529		12.0921	15.5	TCCAATAA	1.59211	43	AATGGTG	0	38	5	0	0	0	0	1	0	0
ddi_can_593		12.0132	15	CACCAAAA	2.01316	142	N/A	0	0	142	0	0	0	0	0	0	0
ddi_can_306		12.0026	21.7	AACAATAT	-4.69737	38	N/A	0	0	38	0	0	0	0	0	0	0
ddi_can_500		11.9921	15.9	ACCAATAA	1.09211	71	N/A	0	0	71	0	0	0	0	0	0	0
ddi_can_310		11.9737	22.5	GCCAACAA	-5.52632	53	N/A	0	0	53	0	0	0	0	0	0	0
ddi_can_450		11.9237	17.2	AATCATAA	-0.276316	24	AATGGTG	0	32	-8	0	0	0	0	0	0	0
ddi_can_326		11.8947	18	GACCACCA	-1.10526	86	CAATGAG	0	3	83	0	1	0	1	0	0	0
ddi_can_575		11.8711	15.2	GTCCATAA	1.67105	95	N/A	0	0	95	0	0	0	0	0	0	0
ddi_can_457		11.8237	17.1	AACTATAA	-0.276316	35	AATTGTG	3.7449	20	15	0	0	0	0	0	0	0
ddi_can_25		11.7947	17.9	CACCACCA	-1.10526	68	ATATGTG	3.7449	1	67	0	0	0	0	0	0	0
ddi_can_505		11.7737	15.8	CACCACAT	0.973684	54	AAAAGAG	0	37	17	0	0	0	1	0	0	0
ddi_can_309		11.7158	17.9	TATCACAA	-1.18421	128	N/A	0	0	128	0	0	0	0	0	0	0
ddi_can_537		11.6237	15.4	TACCAACA	1.22368	50	N/A	0	0	50	0	0	0	0	0	0	0
ddi_can_99		11.5947	17.7	CACCACCA	-1.10526	41	N/A	0	0	41	0	0	0	0	0	0	0
ddi_can_265		11.471	19.3	TCCGATAT	-2.82895	47	N/A	0	0	47	0	0	0	0	0	0	0
ddi_can_487		11.4237	16.2	TATCATAA	0.223684	102	AAGAGTG	0	119	-17	0	0	0	0	0	0	0
ddi_can_443		11.3947	17.5	CACCACCA	-1.10526	129	AAATTTG	3.45918	1	128	0	0	0	0	0	0	0
ddi_can_554		11.3921	15.3	ACCAATAA	1.09211	15	N/A	0	0	15	0	0	0	0	0	0	0
ddi_can_390		11.3526	15.3	ATCCACAT	1.05263	7	N/A	0	0	7	0	0	0	0	0	0	0
ddi_can_382		11.3237	16.6	AACAATAA	-0.276316	20	N/A	0	0	20	0	0	0	0	0	0	0
ddi_can_471		11.2237	16.5	AACTATAA	-0.276316	135	AAATGTC	3.45918	121	14	0	0	0	0	0	0	0
ddi_can_588		11.0921	15	ACCAATAA	1.09211	40	N/A	0	0	40	0	0	0	0	0	0	0
ddi_can_320		11.0395	16	ACCCACAC	0.0394737	39	AATTGGG	0	81	-42	0	0	0	0	0	0	0
ddi_can_552		11.0237	15.3	AACCAACA	0.723684	26	AAGAGTG	0	90	-64	0	0	0	0	0	0	0
ddi_can_550		11.0237	15.3	AACCAACA	0.723684	26	AAGAGTG	0	90	-64	0	0	0	0	0	0	0
ddi_can_481		11.0237	16.3	AAACATAA	-0.276316	40	AAATTTG	3.45918	122	-82	0	0	0	0	0	0	0
ddi_can_482		11.0237	16.3	AAACATAA	-0.276316	38	AAATTTG	3.45918	120	-82	0	0	0	0	0	0	0
ddi_can_456		10.9947	17.1	CACCACCA	-1.10526	79	N/A	0	0	79	0	0	0	0	0	0	0
ddi_can_11		10.8237	15.6	TACTATAA	0.223684	104	N/A	0	0	104	0	0	0	0	0	0	0
ddi_can_445		10.8158	17.5	AACAACAA	-1.68421	121	N/A	0	0	121	0	0	0	0	0	0	0
ddi_can_371		10.8158	17.5	AACAACAA	-1.68421	116	N/A	0	0	116	0	0	0	0	0	0	0
ddi_can_528		10.8026	15.5	CACCATCA	0.302632	19	N/A	0	0	19	0	0	0	0	0	0	0
ddi_can_494		10.7237	16	AAACATAA	-0.276316	103	ATATGAG	0	91	12	0	0	0	0	0	0	0
ddi_can_531		10.6842	15.5	TCCAACAA	0.184211	33	AAATGTC	3.45918	77	-44	1	0	0	1	0	0	0
ddi_can_453		10.5158	17.2	AACTACAA	-1.68421	3	N/A	0	0	3	0	0	0	0	0	0	0
ddi_can_368		10.4921	17.9	CACCAAAT	-2.40789	100	AAATCTG	3.45918	135	-35	0	0	0	0	0	0	0
ddi_can_428		10.4605	18	TCCCATTT	-2.53947	91	AAATGTT	3.45918	48	43	0	0	0	0	0	0	0
ddi_can_480		10.4053	16.3	TACCACTA	-0.894737	82	GAATGGG	0	106	-24	0	0	0	0	0	0	0
ddi_can_278		10.1053	16	TACCACTA	-0.894737	35	AAATGTA	3.45918	25	10	0	0	0	0	0	0	0
ddi_can_543		10.0237	15.3	AACAATAA	-0.276316	38	N/A	0	0	38	0	0	0	1	0	0	0
ddi_can_546		10.0237	15.3	AACTATAA	-0.276316	14	N/A	0	0	14	0	0	0	0	0	0	0
ddi_can_374		10.0158	16.7	AATCACAA	-1.68421	87	N/A	0	0	87	0	0	0	0	0	0	0
ddi_can_244		9.91579	16.6	AATCACAA	-1.68421	99	AAATGTG	13.5714	56	43	0	0	0	0	0	0	0
ddi_can_243		9.91579	16.6	AATCACAA	-1.68421	99	AAATGTG	13.5714	56	43	0	0	0	0	0	0	0
ddi_can_581		9.82368	15.1	AACAATAA	-0.276316	80	N/A	0	0	80	0	0	0	0	0	0	0
ddi_can_446		9.76842	17.4	TGCCAAAA	-2.63158	80	AAATTTG	3.45918	43	37	0	0	0	0	0	0	0
ddi_can_592		9.72368	15	AAACATAA	-0.276316	27	N/A	0	0	27	0	0	0	0	0	0	0
ddi_can_476		9.71579	16.4	AACTACAA	-1.68421	103	N/A	0	0	103	0	0	0	0	0	0	0
ddi_can_497		9.71579	15.9	TACAACAA	-1.18421	87	N/A	0	0	87	0	0	0	0	0	0	0
ddi_can_304		9.59211	18.5	TACCATTT	-3.90789	2	N/A	0	0	2	0	0	0	0	0	0	0
ddi_can_322		9.57105	16.9	ATCCAAAT	-2.32895	80	AAATTTG	3.45918	43	37	0	0	0	0	0	0	0
ddi_can_509		9.51579	15.7	TACAACAA	-1.18421	92	AAATTTG	3.45918	20	72	0	0	0	0	0	0	0
ddi_can_518		9.27105	15.6	AACCACAC	-1.32895	80	N/A	0	0	80	0	0	0	0	0	0	0
ddi_can_538		9.21579	15.4	TACGACAA	-1.18421	93	N/A	0	0	93	0	0	0	0	0	0	0
ddi_can_495		9.17105	16	TTCCAAAT	-1.82895	54	N/A	0	0	54	0	0	0	0	0	0	0
ddi_can_412		9.13421	19.2	AATCAAAA	-5.06579	135	AAAGGTG	3.7449	53	82	0	0	0	0	0	0	0
ddi_can_268		9.03421	19.1	AACTAAAA	-5.06579	87	N/A	0	0	87	0	0	0	0	0	0	0
ddi_can_584		8.91579	15.1	TAACACAA	-1.18421	119	N/A	0	0	119	0	0	0	0	0	0	0
ddi_can_524		8.81579	15.5	AATCACAA	-1.68421	80	N/A	0	0	80	0	0	0	0	0	0	0
ddi_can_477		8.78158	16.4	ACCCAGAT	-2.61842	115	TAATGGG	0	125	-10	0	0	0	0	0	0	0
ddi_can_433		8.71316	17.7	AACCAGAT	-3.98684	54	AAATGTA	3.45918	117	-63	0	0	0	0	0	0	0
ddi_can_414		8.61316	19.1	GACTATAA	-5.48684	69	N/A	0	0	69	0	0	0	0	0	0	0
ddi_can_569		8.51579	15.2	AATCACAA	-1.68421	35	AAATATG	3.45918	79	-44	0	0	0	0	0	0	0
ddi_can_416		8.41316	18.9	GATCATAA	-5.48684	103	AATGGTG	0	141	-38	0	0	0	0	0	0	0
ddi_can_362		8.39211	18.8	ATCTATAA	-5.40789	34	N/A	0	0	34	0	0	0	0	0	0	0
ddi_can_386		8.37105	15.7	ATCCAAAT	-2.32895	135	N/A	0	0	135	0	1	0	1	1	0	0
ddi_can_294		8.35789	16.7	ACCCAAAC	-3.34211	72	GAATGTG	3.7449	100	-28	0	0	0	0	0	0	0
ddi_can_421		8.09211	18.5	ATTCATAA	-5.40789	44	AAATATG	3.45918	117	-73	0	0	0	0	0	0	0
ddi_can_488		8.08158	16.2	GTCCAAAA	-3.11842	121	AAATTTG	3.45918	75	46	0	0	0	0	0	0	0
ddi_can_570		7.87105	15.2	ATCCAAAT	-2.32895	83	AAAAGTG	3.7449	28	55	0	0	0	0	0	0	0
ddi_can_4		7.7	22.7	N/A	-10	0	AAATGTG	13.5714	19	-19	0	0	0	0	0	0	0
ddi_can_376		7.53421	17.1	TACGAAAA	-4.56579	99	AATTGTG	3.7449	78	21	0	0	0	0	0	0	0
ddi_can_447		7.49211	17.4	TTTCATAA	-4.90789	142	N/A	0	0	142	0	0	0	0	0	0	0
ddi_can_318		7.48158	17.6	ATCCATTA	-5.11842	12	TATTGTG	0	125	-113	0	0	0	0	0	0	0
ddi_can_225		7.43421	17.5	AATCAAAA	-5.06579	142	TAATGTG	3.7449	98	44	0	0	0	0	0	0	0
ddi_can_460		7.43421	17	TACTAAAA	-4.56579	38	N/A	0	0	38	0	0	0	0	0	0	0
ddi_can_451		7.29211	17.2	TCCGATCA	-4.90789	26	AAATGTT	3.45918	97	-71	0	0	0	0	0	0	0
ddi_can_319		7.19211	17.6	ATCAATAA	-5.40789	15	AAATGTC	3.45918	139	-124	0	0	0	0	0	0	0
ddi_can_397		7.17105	15	TCACATAT	-2.82895	71	N/A	0	0	71	0	0	0	0	0	0	0
ddi_can_448		7.14737	17.2	ACCCATGG	-5.05263	1	AAATGTT	3.45918	12	-11	0	0	0	0	0	0	0
ddi_can_555		7.10263	15.3	TCACAAAA	-3.19737	25	N/A	0	0	25	0	0	0	0	0	0	0
ddi_can_489		7.08158	16.2	CCCGATAA	-4.11842	12	N/A	0	0	12	0	0	0	0	0	0	0
ddi_can_490		7.04211	16.2	GCCCACCT	-4.15789	21	ATATGGG	0	44	-23	0	0	0	0	0	0	0
ddi_can_516		7.00263	15.7	ACCTAAAA	-3.69737	14	N/A	0	0	14	0	0	0	0	0	0	0
ddi_can_323		6.79211	15.7	TACCATTT	-3.90789	15	N/A	0	0	15	0	0	0	0	0	0	0
ddi_can_385		6.79211	15.7	TACCATTT	-3.90789	122	AAATGTT	3.45918	43	79	0	0	0	0	0	0	0
ddi_can_383		6.77895	16.2	AACCGTAT	-4.42105	15	AAATATG	3.45918	97	-82	0	0	0	0	0	0	0
ddi_can_324		6.73421	16.3	TATCAAAA	-4.56579	19	GAAGGTG	0	143	-124	0	0	0	0	0	0	0
ddi_can_146		6.66316	15.9	TCACACAT	-4.23684	2	N/A	0	0	2	0	0	0	0	0	0	0
ddi_can_331		6.59211	16	AACCATTT	-4.40789	79	AGAAGTG	0	142	-63	0	0	0	0	0	0	0
ddi_can_507		6.52368	15.8	TACCAATA	-4.27632	109	N/A	0	0	109	0	0	0	0	0	0	0
ddi_can_576		6.50263	15.2	ACCTAAAA	-3.69737	114	AATGGTG	0	63	51	0	0	0	0	0	0	0
ddi_can_462		6.49211	16.9	ATCAATAA	-5.40789	67	GATTGTG	0	52	15	0	0	0	0	0	0	0
ddi_can_466		6.39211	16.8	ATCAATAA	-5.40789	126	AATTGGG	0	19	107	0	0	0	0	0	0	0
ddi_can_499		6.33421	15.9	TAACAAAA	-4.56579	87	AAATGTG	13.5714	98	-11	0	0	0	0	0	0	0
ddi_can_291		6.30263	16	AAACATAT	-4.69737	52	N/A	0	0	52	0	0	0	0	0	0	0
ddi_can_511		6.13421	15.7	TACAAAAA	-4.56579	73	N/A	0	0	73	0	0	0	0	0	0	0
ddi_can_574		6.00263	15.2	TTCCAGAA	-4.19737	105	AAAAGTG	3.7449	128	-23	0	0	0	0	0	0	0
ddi_can_493		5.93421	16	AAACAAAA	-5.06579	51	N/A	0	0	51	0	0	0	0	0	0	0
ddi_can_521		5.90263	15.6	AACGATAT	-4.69737	115	N/A	0	0	115	0	0	0	0	0	0	0
ddi_can_402		5.9	20.9	N/A	-10	0	TAATGTG	3.7449	91	-91	0	0	0	0	0	0	0
ddi_can_384		5.64737	15.7	ATCCATAC	-5.05263	101	ATAGGTG	0	52	49	0	0	0	0	0	0	0
ddi_can_510		5.63421	15.7	AAACAAAA	-5.06579	101	N/A	0	0	101	0	0	0	0	0	0	0
ddi_can_547		5.60263	15.3	AAGCATAT	-4.69737	17	AAATCTG	3.45918	127	-110	0	0	0	0	0	0	0
ddi_can_530		5.43421	15.5	AAACAAAA	-5.06579	95	N/A	0	0	95	0	0	0	0	0	0	0
ddi_can_585		5.32368	15.1	CACCAGAA	-4.77632	76	AGAAGTG	0	118	-42	0	0	0	0	0	0	0
ddi_can_567		5.29211	15.2	TCTCATCA	-4.90789	2	N/A	0	0	2	0	0	0	0	0	0	0
ddi_can_408		5.2	20.2	N/A	-10	0	N/A	0	0	0	0	0	0	0	0	0	0
ddi_can_587		5.19211	15.1	TTCTATAA	-4.90789	97	N/A	0	0	97	0	0	0	0	0	0	0
ddi_can_343		5.13421	15.2	AACAAAAA	-5.06579	29	N/A	0	0	29	2	3	3	2	1	4	0
ddi_can_85		5.09211	15	TTACATAA	-4.90789	69	AAATGTT	3.45918	36	33	0	0	0	0	0	0	0
ddi_can_526		5.09211	15.5	ACCAATCA	-5.40789	113	AACAGTG	0	101	12	0	0	0	0	0	0	0
ddi_can_582		5.03421	15.1	AAGCAAAA	-5.06579	97	N/A	0	0	97	0	0	0	0	0	0	0
ddi_can_580		4.90263	15.1	GACCATTA	-5.19737	2	N/A	0	0	2	0	0	0	0	0	0	0
ddi_can_393		4.89211	15.3	ACCAATCA	-5.40789	112	AAATCTG	3.45918	102	10	0	0	0	0	0	0	0
ddi_can_314		4.8	19.8	N/A	-10	0	AATAGTG	0	67	-67	0	0	0	0	0	0	0
ddi_can_360		4.7	19.7	N/A	-10	0	N/A	0	0	0	0	0	0	0	0	0	0
ddi_can_276		4.69211	15.1	ATTCATAA	-5.40789	130	AAATTTG	3.45918	63	67	0	0	0	0	0	0	0
ddi_can_410		4.6	19.6	N/A	-10	0	AATAGTG	0	107	-107	0	0	0	0	0	0	0
ddi_can_411		4.4	19.4	N/A	-10	0	TAAAGTG	0	104	-104	0	0	0	0	0	0	0
ddi_can_413		4.1	19.1	N/A	-10	0	N/A	0	0	0	0	0	0	0	0	0	0
ddi_can_270		4	19	N/A	-10	0	AATTGGG	0	66	-66	0	0	0	0	0	0	0
ddi_can_415		4	19	N/A	-10	0	N/A	0	0	0	0	0	0	0	0	0	0
ddi_can_417		3.8	18.8	N/A	-10	0	N/A	0	0	0	0	0	0	0	0	0	0
ddi_can_423		3.5	18.5	N/A	-10	0	N/A	0	0	0	0	0	0	0	0	0	0
ddi_can_312		3.3	18.3	N/A	-10	0	N/A	0	0	0	0	0	0	0	0	0	0
ddi_can_6		2.9	17.9	N/A	-10	0	N/A	0	0	0	0	0	0	0	0	0	0
ddi_can_369		2.9	17.9	N/A	-10	0	N/A	0	0	0	0	0	0	0	0	0	0
ddi_can_434		2.7	17.7	N/A	-10	0	N/A	0	0	0	0	0	0	0	0	0	0
ddi_can_441		2.6	17.6	N/A	-10	0	AATAGTG	0	67	-67	0	0	0	0	0	0	0
ddi_can_133		2.5	17.5	N/A	-10	0	N/A	0	0	0	0	0	0	0	1	0	0
ddi_can_316		2.5	17.5	N/A	-10	0	AAAAGTG	3.7449	1	-1	0	0	0	0	0	0	0
ddi_can_373		2.3	17.3	N/A	-10	0	AAATCTG	3.45918	51	-51	0	0	0	0	0	0	0
ddi_can_449		2.2	17.2	N/A	-10	0	N/A	0	0	0	0	0	0	0	0	0	0
ddi_can_452		2.2	17.2	N/A	-10	0	N/A	0	0	0	0	0	0	0	0	0	0
ddi_can_454		2.2	17.2	N/A	-10	0	AATTGTG	3.7449	11	-11	0	0	0	0	0	0	0
ddi_can_375		2.1	17.1	N/A	-10	0	N/A	0	0	0	0	0	0	0	0	0	0
ddi_can_288		2.1	17.1	N/A	-10	0	AAATATG	3.45918	3	-3	0	0	0	0	0	0	0
ddi_can_461		2	17	N/A	-10	0	TAGTGTG	0	57	-57	0	0	0	0	0	0	0
ddi_can_467		1.8	16.8	N/A	-10	0	N/A	0	0	0	0	0	0	0	0	0	0
ddi_can_470		1.7	16.7	N/A	-10	0	N/A	0	0	0	0	0	0	0	0	0	0
ddi_can_379		1.7	16.7	N/A	-10	0	N/A	0	0	0	0	0	0	0	0	0	0
ddi_can_292		1.6	16.6	N/A	-10	0	N/A	0	0	0	0	0	0	0	0	0	0
ddi_can_381		1.6	16.6	N/A	-10	0	TAATGAG	0	98	-98	0	0	0	0	0	0	0
ddi_can_380		1.6	16.6	N/A	-10	0	TAATGAG	0	100	-100	0	0	0	0	0	0	0
ddi_can_159		1.5	16.5	N/A	-10	0	CAATGAG	0	135	-135	0	0	0	0	0	0	0
ddi_can_478		1.4	16.4	N/A	-10	0	N/A	0	0	0	0	0	0	0	0	0	0
ddi_can_484		1.3	16.3	N/A	-10	0	N/A	0	0	0	0	0	0	0	0	0	0
ddi_can_485		1.3	16.3	N/A	-10	0	AATTGTG	3.7449	96	-96	0	0	0	0	0	0	0
ddi_can_135		1	16	N/A	-10	0	GAATGAG	0	102	-102	0	0	0	0	0	0	0
ddi_can_275		0.9	15.9	N/A	-10	0	N/A	0	0	0	0	0	0	0	1	0	0
ddi_can_286		0.9	15.9	N/A	-10	0	ATATGAG	0	119	-119	0	0	0	0	0	0	0
ddi_can_57		0.9	15.9	N/A	-10	0	AAATTTG	3.45918	28	-28	0	0	0	0	0	0	0
ddi_can_506		0.8	15.8	N/A	-10	0	N/A	0	0	0	0	0	0	0	0	0	0
ddi_can_325		0.8	15.8	N/A	-10	0	N/A	0	0	0	0	0	0	0	0	0	0
ddi_can_522		0.6	15.6	N/A	-10	0	CAATGTG	3.7449	51	-51	0	0	0	0	0	0	0
ddi_can_520		0.6	15.6	N/A	-10	0	GAATGAG	0	75	-75	0	0	0	0	0	0	0
ddi_can_387		0.5	15.5	N/A	-10	0	ATATGAG	0	35	-35	0	1	0	0	0	1	0
ddi_can_527		0.5	15.5	N/A	-10	0	AATTGGG	0	27	-27	0	0	0	0	0	0	0
ddi_can_525		0.5	15.5	N/A	-10	0	AAAAGAG	0	112	-112	0	0	0	0	0	0	0
ddi_can_541		0.4	15.4	N/A	-10	0	N/A	0	0	0	1	3	0	0	0	0	0
ddi_can_532		0.4	15.4	N/A	-10	0	N/A	0	0	0	0	0	0	0	0	0	0
ddi_can_534		0.4	15.4	N/A	-10	0	N/A	0	0	0	0	0	0	0	0	0	0
ddi_can_540		0.4	15.4	N/A	-10	0	AAAAGTG	3.7449	87	-87	0	0	0	0	0	0	0
ddi_can_273		0.3	15.3	N/A	-10	0	AATTGAG	0	73	-73	0	0	0	0	0	0	0
ddi_can_542		0.3	15.3	N/A	-10	0	AAATTTG	3.45918	16	-16	0	0	0	0	0	0	0
ddi_can_549		0.3	15.3	N/A	-10	0	AAGAGTG	0	90	-90	0	0	0	0	0	0	0
ddi_can_548		0.3	15.3	N/A	-10	0	N/A	0	0	0	0	0	0	0	0	0	0
ddi_can_544		0.3	15.3	N/A	-10	0	N/A	0	0	0	0	0	0	0	0	0	0
ddi_can_213		0.3	15.3	N/A	-10	0	N/A	0	0	0	0	0	0	0	0	0	0
ddi_can_551		0.3	15.3	N/A	-10	0	AAGAGTG	0	90	-90	0	0	0	0	0	0	0
ddi_can_568		0.2	15.2	N/A	-10	0	CAATGAG	0	15	-15	0	0	0	0	0	0	0
ddi_can_565		0.2	15.2	N/A	-10	0	GAATGAG	0	138	-138	0	0	0	0	0	0	0
ddi_can_564		0.2	15.2	N/A	-10	0	GAATGAG	0	138	-138	0	0	0	0	0	0	0
ddi_can_563		0.2	15.2	N/A	-10	0	GAATGAG	0	140	-140	0	0	0	0	0	0	0
ddi_can_562		0.2	15.2	N/A	-10	0	GAATGAG	0	138	-138	0	0	0	0	0	0	0
ddi_can_561		0.2	15.2	N/A	-10	0	GAATGAG	0	140	-140	0	0	0	0	0	0	0
ddi_can_560		0.2	15.2	N/A	-10	0	GAATGAG	0	138	-138	0	0	0	0	0	0	0
ddi_can_558		0.2	15.2	N/A	-10	0	GAATGTG	3.7449	51	-51	0	0	0	0	0	0	0
ddi_can_395		0.2	15.2	N/A	-10	0	AATTGGG	0	7	-7	0	0	0	0	0	0	0
ddi_can_559		0.2	15.2	N/A	-10	0	GAATGAG	0	138	-138	0	0	0	0	0	0	0
ddi_can_586		0.1	15.1	N/A	-10	0	N/A	0	0	0	0	0	0	0	0	0	0
ddi_can_578		0.1	15.1	N/A	-10	0	AAATTTG	3.45918	69	-69	0	0	0	0	0	0	0
ddi_can_589		0	15	N/A	-10	0	N/A	0	0	0	0	0	0	0	0	0	0
ddi_can_590		0	15	N/A	-10	0	N/A	0	0	0	0	0	0	0	0	0	0
ddi_can_595		0	15	N/A	-10	0	N/A	0	0	0	0	0	0	0	0	0	0

## Sheet: D. purpureum
		Classifier summary									Read counts	Expression validation
Class I RNA candidate	Name	classifier score	CM score	DUSE_seq	duse_score	duse_dist	TGTG-box_seq	TGTG-box_score	TGTG-box_dist	inter_dist		Read coverage	Northern blot
dpu_can_1	DpuR-8	71.8816	53	TCCCATAA	13.8816	60	N/A	0	0	60	N/A	N/A	DpuR-Y
dpu_can_116	DpuR-12	71.2816	52.4	TCCCATAA	13.8816	61	AAATTTG	3.45918	115	-54	N/A	N/A	DpuR-Y
dpu_can_117	DpuR-14	71.0816	52.2	TCCCATAA	13.8816	58	AATTGAG	0	91	-33	N/A	N/A	DpuR-Y
dpu_can_119	DpuR-11	67.2816	48.4	TCCCATAA	13.8816	57	N/A	0	0	57	N/A	N/A	DpuR-Y
dpu_can_122	DpuR-24	64.9816	46.6	ACCCATAA	13.3816	59	AAATTTG	3.45918	7	52	N/A	N/A	DpuR-Y
dpu_can_121	DpuR-20	62.3737	44.9	TCCCACAA	12.4737	59	AAATTTG	3.45918	72	-13	N/A	N/A	DpuR-Y
dpu_can_115	DpuR-23	62.1816	43.8	ACCCATAA	13.3816	58	AAATGTT	3.45918	45	13	N/A	N/A	DpuR-Y
dpu_can_120	DpuR-17	61.4816	42.6	TCCCATAA	13.8816	57	N/A	0	0	57	N/A	N/A	DpuR-Y
dpu_can_118	DpuR-7	61.1816	42.8	ACCCATAA	13.3816	57	AAATGTT	3.45918	44	13	N/A	N/A	DpuR-7, DpuR-Y
dpu_can_127	DpuR-3	60.6816	41.8	TCCCATAA	13.8816	56	ATTTGTG	0	123	-67	N/A	N/A	DpuR-Y
dpu_can_2	DpuR-4	60.2816	41.9	ACCCATAA	13.3816	61	N/A	0	0	61	N/A	N/A	DpuR-Y
dpu_can_124	DpuR-10	58.7737	41.3	TCCCACAA	12.4737	58	N/A	0	0	58	N/A	N/A	DpuR-Y
dpu_can_239	DpuR-16	58.6816	39.8	TCCCATAA	13.8816	58	N/A	0	0	58	N/A	N/A	DpuR-X, DpuR-Y
dpu_can_240	DpuR-13	58.3816	39.5	TCCCATAA	13.8816	57	GATTGTG	0	80	-23	N/A	N/A	DpuR-X, DpuR-Y	Identical sequence to DpuR-21
dpu_can_241	DpuR-21	58.3816	39.5	TCCCATAA	13.8816	60	GATTGTG	0	85	-25	N/A	N/A	DpuR-X, DpuR-Y	Identical sequence to DpuR-13
dpu_can_242	DpuR-26	58.3816	39.5	TCCCATAA	13.8816	58	GATTGTG	0	83	-25	N/A	N/A	DpuR-X, DpuR-Y
dpu_can_123	DpuR-18	58.0737	40.6	TCCCACAA	12.4737	59	N/A	0	0	59	N/A	N/A	DpuR-Y
dpu_can_11	DpuR-2	57.9816	39.6	ACCCATAA	13.3816	59	N/A	0	0	59	N/A	N/A	DpuR-Y
dpu_can_237	DpuR-25	57.3816	38.5	TCCCATAA	13.8816	58	AAATATG	3.45918	119	-61	N/A	N/A	DpuR-Y
dpu_can_347	DpuR-22	57.0816	38.7	ACCCATAA	13.3816	57	N/A	0	0	57	N/A	N/A
dpu_can_302	DpuR-1	56.7816	37.9	TCCCATAA	13.8816	60	AATTGAG	0	101	-41	N/A	N/A	DpuR-Y
dpu_can_304	DpuR-5	56.7816	37.9	TCCCATAA	13.8816	57	N/A	0	0	57	N/A	N/A	DpuR-X, DpuR-Y	Identical sequence to DpuR-6
dpu_can_305	DpuR-6	56.7816	37.9	TCCCATAA	13.8816	60	N/A	0	0	60	N/A	N/A	DpuR-X, DpuR-Y	Identical sequence to DpuR-5
dpu_can_131	DpuR-9	50.2816	31.9	ACCCATAA	13.3816	56	N/A	0	0	56	N/A	N/A	DpuR-Y
dpu_can_591	DpuR-19	49.9816	31.1	TCCCATAA	13.8816	58	N/A	0	0	58	N/A	N/A	DpuR-Y
dpu_can_303	DpuR-15	45.7816	36.9	TCCCATAA	13.8816	43	AATTGGG	0	94	-51	N/A	N/A
dpu_can_592	DpuR-27	41.5816	22.7	TCCCATAA	13.8816	59	N/A	0	0	59	N/A	N/A
dpu_can_594	DpuR-28	39.0132	21.5	TACCATAA	12.5132	56	N/A	0	0	56	N/A	N/A
dpu_can_597	DpuR-29	36.8132	19.3	TACCATAA	12.5132	58	N/A	0	0	58	N/A	N/A		Identical sequence to DpuR-30
dpu_can_598	DpuR-30	36.8132	19.3	TACCATAA	12.5132	58	N/A	0	0	58	N/A	N/A		Identical sequence to DpuR-29
dpu_can_149		27.4026	20.1	TCCCAGAA	2.30263	59	AAATCTG	3.45918	76	-17	N/A	N/A
dpu_can_166		27.3737	16.4	TTCCACAA	5.97368	104	AATTGGG	0	48	56	N/A	N/A
dpu_can_128		27.0053	17.9	AACCACCA	4.10526	57	N/A	0	0	57	N/A	N/A
dpu_can_427		26.9816	18.6	CCCCAAAA	3.38158	61	AAAAGAG	0	58	3	N/A	N/A
dpu_can_468		26.6711	17.5	ACCCAAAT	4.17105	56	AAATGTG	13.5714	112	-56	N/A	N/A
dpu_can_354		26.5816	18.2	ACCCATAA	13.3816	103	AATTGTG	3.7449	52	51	N/A	N/A
dpu_can_126		26.5053	20.4	TACCACAA	11.1053	113	N/A	0	0	113	N/A	N/A
dpu_can_136		23.8921	17.3	TCCAATAA	1.59211	123	AAATGGG	3.7449	60	63	N/A	N/A
dpu_can_311		23.771	20.6	GCCCATAA	8.17105	137	N/A	0	0	137	N/A	N/A
dpu_can_58		23.6026	15.8	AACCAAAT	2.80263	60	AAATGGG	3.7449	108	-48	N/A	N/A
dpu_can_356		23.4237	21.2	AACCAAAA	7.22368	114	N/A	0	0	114	N/A	N/A
dpu_can_426		23.1921	19.6	ACCCAAAA	8.59211	97	AAATGTT	3.45918	26	71	N/A	N/A
dpu_can_543		23.1921	15.6	TTCCAAAA	2.59211	57	ATATGTG	3.7449	100	-43	N/A	N/A
dpu_can_469		23.0053	17.4	AACCACAA	10.6053	38	AAAAGAG	0	32	6	N/A	N/A
dpu_can_580		22.6921	15.1	TTCCAAAA	2.59211	58	N/A	0	0	58	N/A	N/A
dpu_can_478		22.6053	17	AACCACAA	10.6053	66	AATGGTG	0	18	48	N/A	N/A
dpu_can_351		21.8605	17.9	ACCCATAT	8.96053	90	N/A	0	0	90	N/A	N/A
dpu_can_494		21.8342	16.4	AACCAGAA	0.434211	56	AACTGTG	3.7449	49	7	N/A	N/A
dpu_can_429		21.5921	18	ACCCAAAA	8.59211	12	AAATGTT	3.45918	44	-32	N/A	N/A
dpu_can_596		21.5237	19.3	AACCAAAA	7.22368	90	N/A	0	0	90	N/A	N/A
dpu_can_570		21.2921	15.2	ACTCATAA	1.09211	60	AAAAGAG	0	126	-66	N/A	N/A
dpu_can_563		20.9053	15.3	AACCACAA	10.6053	65	TAATGCG	0	98	-33	N/A	N/A
dpu_can_519		20.4605	16	TCCCATAT	9.46053	21	N/A	0	0	21	N/A	N/A
dpu_can_575		20.4237	15.2	TATCATAA	0.223684	115	AAATTTG	3.45918	57	58	N/A	N/A
dpu_can_545		20.0605	15.6	TCCCATAT	9.46053	133	AATAGTG	0	83	50	N/A	N/A
dpu_can_298		19.7237	15	AAACATAA	-0.276316	57	N/A	0	0	57	N/A	N/A
dpu_can_473		19.6921	17.1	AACCATAT	7.59211	12	N/A	0	0	12	N/A	N/A
dpu_can_483		19.6816	16.8	TCCCAGAT	-2.11842	60	AAATGTT	3.45918	86	-26	N/A	N/A
dpu_can_436		19.4711	16.3	GCCCATAA	8.17105	51	TATTGTG	0	90	-39	N/A	N/A
dpu_can_307		19.3053	19.7	TACCACCA	4.60526	36	AAATTTG	3.45918	25	11	N/A	N/A
dpu_can_379		19.2737	18.3	TTCCACAA	5.97368	82	N/A	0	0	82	N/A	N/A
dpu_can_309		19.0237	16.8	AACCAAAA	7.22368	118	N/A	0	0	118	N/A	N/A
dpu_can_359		18.6921	16.1	AACCATAT	7.59211	105	AAAAGTG	3.7449	136	-31	N/A	N/A
dpu_can_493		18.6237	16.4	AACCAAAA	7.22368	19	N/A	0	0	19	N/A	N/A
dpu_can_515		18.5921	16	AACCATAT	7.59211	136	N/A	0	0	136	N/A	N/A
dpu_can_340		18.4237	16.2	AACCAAAA	7.22368	136	N/A	0	0	136	N/A	N/A
dpu_can_453		18.4053	18.8	TACCACCA	4.60526	109	GAAGGTG	0	100	9	N/A	N/A
dpu_can_406		18.1526	15.6	ACCCACAT	7.55263	140	ACCTGTG	0	132	8	N/A	N/A
dpu_can_477		18.0789	17	TACCATAG	6.07895	10	AATTGAG	0	18	-8	N/A	N/A
dpu_can_555		18.0237	15.3	TACCAAAA	7.72368	85	AAATTTG	3.45918	112	-27	N/A	N/A
dpu_can_125		17.8921	26.8	TACCATTT	-3.90789	90	N/A	0	0	90	N/A	N/A
dpu_can_130		17.6816	21.8	TTCCATCA	0.881579	140	GAAGGTG	0	49	91	N/A	N/A
dpu_can_350		17.4132	20.4	CACCAAAA	2.01316	141	N/A	0	0	141	N/A	N/A
dpu_can_479		17.2026	16.9	AACAATAT	-4.69737	61	N/A	0	0	61	N/A	N/A
dpu_can_428		16.8816	18.5	CCCCAAAA	3.38158	115	AAAAGTG	3.7449	86	29	N/A	N/A
dpu_can_348		16.8	31.8	N/A	-10	0	N/A	0	0	0	N/A	N/A
dpu_can_247		16.6237	21.9	AACAATAA	-0.276316	76	N/A	0	0	76	N/A	N/A
dpu_can_430		16.6053	17.5	AACCACCA	4.10526	20	AAAAGTG	3.7449	111	-91	N/A	N/A
dpu_can_425		16.5368	19.8	CCCCATAG	1.73684	76	AGAAGTG	0	35	41	N/A	N/A
dpu_can_595		16.4816	20.6	TTCCATCA	0.881579	137	AACTGAG	0	59	78	N/A	N/A
dpu_can_553		16.479	15.4	TACCTTAT	-3.92105	117	AAATATG	3.45918	55	62	N/A	N/A
dpu_can_548		16.0789	15.5	AACCATAG	5.57895	121	N/A	0	0	121	N/A	N/A
dpu_can_407		15.9947	15.6	CACCACAA	5.39474	99	AAAAGGG	0	119	-20	N/A	N/A
dpu_can_503		15.9053	16.3	TACCACCA	4.60526	89	AAATGTT	3.45918	77	12	N/A	N/A
dpu_can_244		15.8237	21.1	AAACATAA	-0.276316	126	AATTGTG	3.7449	105	21	N/A	N/A
dpu_can_572		15.7132	15.2	AACCATCA	5.51316	78	AATTGGG	0	95	-17	N/A	N/A
dpu_can_558		15.6947	15.3	CACCACAA	5.39474	8	AATGGTG	0	34	-26	N/A	N/A
dpu_can_53		15.5737	15.1	ATCCACAA	5.47368	3	AAAAGAG	0	120	-117	N/A	N/A
dpu_can_472		15.5026	17.2	TACCAAAT	3.30263	92	CAAAGTG	0	64	28	N/A	N/A
dpu_can_437		15.4053	16.3	AACCACCA	4.10526	119	N/A	0	0	119	N/A	N/A
dpu_can_375		15.4026	18.6	ACCCAGAA	1.80263	51	TAATGTG	3.7449	118	-67	N/A	N/A
dpu_can_230		15.35	23.1	GTCCATAT	-2.75	131	N/A	0	0	131	N/A	N/A
dpu_can_452		14.9921	18.9	ACCAATAA	1.09211	38	N/A	0	0	38	N/A	N/A
dpu_can_196		14.9237	20.2	AACGATAA	-0.276316	101	N/A	0	0	101	N/A	N/A
dpu_can_418		14.7842	15.1	TACCACGT	-5.31579	61	AAAAGAG	0	120	-59	N/A	N/A
dpu_can_411		14.571	15.4	ACCCAAAT	4.17105	131	N/A	0	0	131	N/A	N/A
dpu_can_557		14.471	15.3	ACCCAAAT	4.17105	11	AATAGTG	0	53	-42	N/A	N/A
dpu_can_257		14.2711	22.6	ACTCATAT	-3.32895	133	N/A	0	0	133	N/A	N/A
dpu_can_349		14.0711	19.9	TACCACAC	-0.828947	100	AATGGTG	0	109	-9	N/A	N/A
dpu_can_507		14.0605	16.1	TTCCATAT	2.96053	44	N/A	0	0	44	N/A	N/A
dpu_can_508		14.0605	16.1	TTCCATAT	2.96053	44	N/A	0	0	44	N/A	N/A
dpu_can_496		13.9921	16.4	TTCCAAAA	2.59211	21	TTATGTG	0	74	-53	N/A	N/A
dpu_can_432		13.9132	16.9	CACCAAAA	2.01316	15	ATAAGTG	0	93	-78	N/A	N/A
dpu_can_140		13.9026	15.6	TACCAAAT	3.30263	97	N/A	0	0	97	N/A	N/A
dpu_can_322		13.6895	17.9	AACCAAAG	0.789474	50	ATATGTG	3.7449	19	31	N/A	N/A
dpu_can_538		13.6605	15.7	TTCCATAT	2.96053	68	TAATGAG	0	85	-17	N/A	N/A
dpu_can_370		13.6026	15.3	TACCAAAT	3.30263	108	AAATTTG	3.45918	43	65	N/A	N/A
dpu_can_363		13.5921	16.5	ACCCAACA	2.09211	86	N/A	0	0	86	N/A	N/A
dpu_can_490		13.5921	16.5	ACCCAACA	2.09211	119	N/A	0	0	119	N/A	N/A
dpu_can_573		13.5816	15.2	CCCCAAAA	3.38158	129	N/A	0	0	129	N/A	N/A
dpu_can_50		13.5026	15.2	TACCAAAT	3.30263	43	AAATGTT	3.45918	69	-26	N/A	N/A
dpu_can_569		13.5026	15.2	TACCAAAT	3.30263	135	AAATATG	3.45918	57	78	N/A	N/A
dpu_can_5		13.471	20.8	ATCCAAAT	-2.32895	94	N/A	0	0	94	N/A	N/A
dpu_can_458		13.4632	18.2	CCCCACCA	0.263158	114	ACTTGTG	0	26	88	N/A	N/A
dpu_can_513		13.4605	16	ATCCATAT	2.46053	68	AAAAGTG	3.7449	106	-38	N/A	N/A
dpu_can_402		13.1605	15.7	ATCCATAT	2.46053	99	AAATGTT	3.45918	15	84	N/A	N/A
dpu_can_365		13.0237	18.3	AACAATAA	-0.276316	92	AAATCTG	3.45918	39	53	N/A	N/A
dpu_can_394		12.9605	17.5	TCCCTCAA	0.460526	74	N/A	0	0	74	N/A	N/A
dpu_can_353		12.9	17.9	AACCTTAA	0	97	AAATGTT	3.45918	45	52	N/A	N/A
dpu_can_362		12.8921	16.8	AACCATCT	1.09211	69	N/A	0	0	69	N/A	N/A
dpu_can_412		12.8605	15.4	ACCCATCT	2.46053	100	AAAGGGG	0	7	93	N/A	N/A
dpu_can_465		12.8237	17.6	TATCATAA	0.223684	48	N/A	0	0	48	N/A	N/A
dpu_can_4		12.7026	21.9	TACGATAT	-4.19737	124	N/A	0	0	124	N/A	N/A
dpu_can_243		12.6053	19	AACCACTA	-1.39474	55	N/A	0	0	55	N/A	N/A
dpu_can_283		12.5921	16.5	ACCAATAA	1.09211	85	N/A	0	0	85	N/A	N/A
dpu_can_358		12.5132	15.5	CACCAAAA	2.01316	33	ATAAGTG	0	90	-57	N/A	N/A
dpu_can_590		12.4605	15	ATCCATAT	2.46053	105	N/A	0	0	105	N/A	N/A
dpu_can_564		12.3921	15.3	ATCCAAAA	2.09211	142	ACAAGTG	0	48	94	N/A	N/A
dpu_can_480		12.2816	16.9	ATCCATCA	0.381579	122	GAAAGTG	0	76	46	N/A	N/A
dpu_can_415		12.2132	15.2	CACCAAAA	2.01316	113	AAATATG	3.45918	34	79	N/A	N/A
dpu_can_308		12.15	19.9	GTCCATAT	-2.75	131	AAATGAG	3.7449	138	-7	N/A	N/A
dpu_can_434		12.1395	16.6	TCCCACAC	0.539474	45	AAATATG	3.45918	126	-81	N/A	N/A
dpu_can_445		12.0237	15.8	TACCAACA	1.22368	39	ACAAGTG	0	35	4	N/A	N/A
dpu_can_431		11.8842	17.2	ACCAACAA	-0.315789	120	AAATGTA	3.45918	42	78	N/A	N/A
dpu_can_147		11.8711	18.7	TTCCAAAT	-1.82895	43	N/A	0	0	43	N/A	N/A
dpu_can_277		11.7947	17.9	CACCACCA	-1.10526	80	AAAGGTG	3.7449	88	-8	N/A	N/A
dpu_can_568		11.7921	15.2	TCCAATAA	1.59211	34	GAATGAG	0	138	-104	N/A	N/A
dpu_can_582		11.7711	15.1	CTCCATAA	1.67105	137	N/A	0	0	137	N/A	N/A
dpu_can_475		11.7237	17	AAACATAA	-0.276316	42	N/A	0	0	42	N/A	N/A
dpu_can_443		11.6816	15.8	TTCCATCA	0.881579	115	GAAAGTG	0	48	67	N/A	N/A
dpu_can_486		11.6737	16.7	ACCCACTA	-0.0263158	9	AATGGTG	0	57	-48	N/A	N/A
dpu_can_539		11.6737	15.7	CACCACAT	0.973684	16	AAATTTG	3.45918	32	-16	N/A	N/A
dpu_can_534		11.6342	15.7	TACCAGAA	0.934211	128	GATTGTG	0	24	104	N/A	N/A
dpu_can_318		11.5842	16.4	TCTCACAA	0.184211	131	GAATGGG	0	0	131	N/A	N/A
dpu_can_552		11.4921	15.4	ACCAATAA	1.09211	130	N/A	0	0	130	N/A	N/A
dpu_can_510		11.4026	16.1	CACCATCA	0.302632	110	N/A	0	0	110	N/A	N/A
dpu_can_335		11.4026	20.6	TACAATAT	-4.19737	13	N/A	0	0	13	N/A	N/A
dpu_can_310		11.3789	16.8	TACCATCG	-0.421053	27	AAATATG	3.45918	106	-79	N/A	N/A
dpu_can_518		11.3026	16	CACCATCA	0.302632	110	GAATGAG	0	119	-9	N/A	N/A
dpu_can_574		11.2526	15.2	ATCCACAT	1.05263	77	TAATGGG	0	92	-15	N/A	N/A
dpu_can_523		11.2342	15.8	AACCAGAA	0.434211	51	N/A	0	0	51	N/A	N/A
dpu_can_313		11.2026	19.9	AACCAACT	-3.69737	138	ACAAGTG	0	98	40	N/A	N/A
dpu_can_521		11.1237	15.9	TAACATAA	0.223684	122	N/A	0	0	122	N/A	N/A
dpu_can_542		11.0605	15.6	TCCCTCAA	0.460526	67	AAAAGTG	3.7449	112	-45	N/A	N/A
dpu_can_549		11.0132	15.5	TACCATTA	0.513158	89	N/A	0	0	89	N/A	N/A
dpu_can_355		10.9816	15.6	ATCCATCA	0.381579	70	ACAAGTG	0	61	9	N/A	N/A
dpu_can_505		10.9237	16.2	AACAATAA	-0.276316	24	N/A	0	0	24	N/A	N/A
dpu_can_398		10.9237	20.7	AACCAATA	-4.77632	81	N/A	0	0	81	N/A	N/A
dpu_can_371		10.9026	15.6	CACCATCA	0.302632	95	AATGGTG	0	61	34	N/A	N/A
dpu_can_380		10.9026	15.6	GACCATCA	0.302632	14	AAAAGTG	3.7449	22	-8	N/A	N/A
dpu_can_404		10.8237	15.6	TACTATAA	0.223684	37	N/A	0	0	37	N/A	N/A
dpu_can_476		10.8158	17	TACAACAA	-1.18421	33	N/A	0	0	33	N/A	N/A
dpu_can_410		10.7816	15.4	ATCCATCA	0.381579	106	N/A	0	0	106	N/A	N/A
dpu_can_214		10.7711	17.6	TTCCAAAT	-1.82895	24	N/A	0	0	24	N/A	N/A
dpu_can_522		10.6237	15.9	AATCATAA	-0.276316	128	N/A	0	0	128	N/A	N/A
dpu_can_578		10.5342	15.1	AACCAGAA	0.434211	73	N/A	0	0	73	N/A	N/A
dpu_can_556		10.5237	15.3	TATCATAA	0.223684	4	N/A	0	0	4	N/A	N/A
dpu_can_403		10.4237	15.7	AACTATAA	-0.276316	65	AAATGTT	3.45918	113	-48	N/A	N/A
dpu_can_438		10.2921	16.2	TACCCCAA	-0.907895	131	AAATATG	3.45918	77	54	N/A	N/A
dpu_can_408		10.2237	15.5	AAACATAA	-0.276316	136	AAATGTA	3.45918	15	121	N/A	N/A
dpu_can_495		10.2158	16.4	TATCACAA	-1.18421	35	N/A	0	0	35	N/A	N/A
dpu_can_439		10.1605	16.2	GCCCAAAT	-1.03947	83	AAATCTG	3.45918	80	3	N/A	N/A
dpu_can_504		10.1158	16.3	TAGCACAA	-1.18421	50	N/A	0	0	50	N/A	N/A
dpu_can_413		10.0237	15.3	AAACATAA	-0.276316	137	AAATGTA	3.45918	13	124	N/A	N/A
dpu_can_562		10.0237	15.3	AACAATAA	-0.276316	2	N/A	0	0	2	N/A	N/A
dpu_can_470		9.97105	17.3	ATCCAAAT	-2.32895	50	AAATGTT	3.45918	67	-17	N/A	N/A
dpu_can_417		9.92368	15.2	AAACATAA	-0.276316	139	AAATGTA	3.45918	15	124	N/A	N/A
dpu_can_512		9.91579	16.1	TAGCACAA	-1.18421	93	AAATGTA	3.45918	24	69	N/A	N/A
dpu_can_421		9.82368	15.1	AAACATAA	-0.276316	139	AAATGTA	3.45918	15	124	N/A	N/A
dpu_can_316		9.77105	17.1	ACCCAACT	-2.32895	29	AAAGGAG	0	124	-95	N/A	N/A
dpu_can_297		9.72368	15	AACAATAA	-0.276316	126	N/A	0	0	126	N/A	N/A
dpu_can_451		9.53421	19.1	TAACAAAA	-4.56579	89	N/A	0	0	89	N/A	N/A
dpu_can_535		9.51579	15.7	TACAACAA	-1.18421	101	N/A	0	0	101	N/A	N/A
dpu_can_462		9.50263	17.7	TCACAAAA	-3.19737	13	AAATATG	3.45918	29	-16	N/A	N/A
dpu_can_319		9.17368	15.2	ATCCACCA	-1.02632	78	AGATGTG	3.7449	72	6	N/A	N/A
dpu_can_364		9.17105	17.5	ACCTATAT	-3.32895	0	N/A	0	0	0	N/A	N/A
dpu_can_440		9.17105	16	TTCCAAAT	-1.82895	50	N/A	0	0	50	N/A	N/A
dpu_can_448		9.01579	15.7	AACAACAA	-1.68421	137	N/A	0	0	137	N/A	N/A
dpu_can_585		8.99474	15.1	CACCACCA	-1.10526	80	N/A	0	0	80	N/A	N/A
dpu_can_369		8.91579	15.6	AACAACAA	-1.68421	96	AAAAGAG	0	136	-40	N/A	N/A
dpu_can_546		8.91579	15.6	AACAACAA	-1.68421	12	N/A	0	0	12	N/A	N/A
dpu_can_583		8.77105	15.1	AACCACAC	-1.32895	28	N/A	0	0	28	N/A	N/A
dpu_can_454		8.73421	18.3	TACTAAAA	-4.56579	78	ATATGGG	0	88	-10	N/A	N/A
dpu_can_441		8.67105	16	ATCCAAAT	-2.32895	53	N/A	0	0	53	N/A	N/A
dpu_can_464		8.40263	17.6	TAACATAT	-4.19737	18	AAATGTC	3.45918	66	-48	N/A	N/A
dpu_can_113		8.36316	18.1	ACCTACAT	-4.73684	29	TAAGGTG	0	132	-103	N/A	N/A
dpu_can_400		8.27895	17.2	TACCGTAT	-3.92105	98	GATTGTG	0	141	-43	N/A	N/A
dpu_can_460		8.20263	17.9	AACTATAT	-4.69737	130	N/A	0	0	130	N/A	N/A
dpu_can_517		8.17105	16	TCCAATAT	-2.82895	131	ACAAGTG	0	107	24	N/A	N/A
dpu_can_324		8.13684	15.9	AGCCATAT	-2.76316	99	N/A	0	0	99	N/A	N/A
dpu_can_456		8.06842	18.2	ATCCGTAA	-5.13158	72	AAATTTG	3.45918	90	-18	N/A	N/A
dpu_can_551		7.99211	15.4	GACCAAAT	-2.40789	66	N/A	0	0	66	N/A	N/A
dpu_can_499		7.97105	16.3	ACACATAT	-3.32895	76	AAATCTG	3.45918	129	-53	N/A	N/A
dpu_can_388		7.97105	15.8	TCCAATAT	-2.82895	23	N/A	0	0	23	N/A	N/A
dpu_can_526		7.97105	15.8	TCCAATAT	-2.82895	118	N/A	0	0	118	N/A	N/A
dpu_can_528		7.97105	15.8	TCCAATAT	-2.82895	23	N/A	0	0	23	N/A	N/A
dpu_can_529		7.97105	15.8	TCCAATAT	-2.82895	23	N/A	0	0	23	N/A	N/A
dpu_can_530		7.97105	15.8	TCCAATAT	-2.82895	23	AAATTTG	3.45918	133	-110	N/A	N/A
dpu_can_531		7.97105	15.8	TCCAATAT	-2.82895	23	N/A	0	0	23	N/A	N/A
dpu_can_532		7.97105	15.8	TCCAATAT	-2.82895	23	N/A	0	0	23	N/A	N/A
dpu_can_533		7.97105	15.8	TCCAATAT	-2.82895	23	N/A	0	0	23	N/A	N/A
dpu_can_246		7.90263	17.6	AACTATAT	-4.69737	125	N/A	0	0	125	N/A	N/A
dpu_can_566		7.89211	15.3	GACCAAAT	-2.40789	51	AAATGTT	3.45918	99	-48	N/A	N/A
dpu_can_387		7.87105	15.7	TCCAATAT	-2.82895	23	N/A	0	0	23	N/A	N/A
dpu_can_471		7.73421	17.3	TATCAAAA	-4.56579	5	TAAAGTG	0	74	-69	N/A	N/A
dpu_can_481		7.60263	16.8	TAACATAT	-4.19737	13	N/A	0	0	13	N/A	N/A
dpu_can_317		7.53421	17.6	AAACAAAA	-5.06579	7	AAATATG	3.45918	3	4	N/A	N/A
dpu_can_378		7.50263	16.2	AACCAACT	-3.69737	133	AACGGTG	0	88	45	N/A	N/A
dpu_can_593		7.5	22.5	N/A	-10	0	ATATGTG	3.7449	130	-130	N/A	N/A
dpu_can_565		7.47105	15.3	TCACATAT	-2.82895	103	N/A	0	0	103	N/A	N/A
dpu_can_509		7.40263	16.1	ACCTAAAA	-3.69737	75	N/A	0	0	75	N/A	N/A
dpu_can_450		7.37105	15.7	ACGCATAT	-3.32895	6	N/A	0	0	6	N/A	N/A
dpu_can_487		7.29211	16.7	AACCATTT	-4.40789	68	N/A	0	0	68	N/A	N/A
dpu_can_576		7.16053	15.2	ACCCATGT	-3.03947	114	N/A	0	0	114	N/A	N/A
dpu_can_360		7.11316	16.1	AACCAGAT	-3.98684	17	N/A	0	0	17	N/A	N/A
dpu_can_238		7.1	22.1	N/A	-10	0	AAATTTG	3.45918	31	-31	N/A	N/A
dpu_can_424		7.1	22.1	N/A	-10	0	AGATGTG	3.7449	114	-114	N/A	N/A
dpu_can_581		7.06053	15.1	ACCCATTT	-3.03947	83	N/A	0	0	83	N/A	N/A
dpu_can_251		7.01316	16	AACCAGAT	-3.98684	81	N/A	0	0	81	N/A	N/A
dpu_can_144		6.95789	16.8	AGCCATCA	-4.84211	134	AATTGTG	3.7449	25	109	N/A	N/A
dpu_can_329		6.93421	17	AACTAAAA	-5.06579	19	AAATGAG	3.7449	135	-116	N/A	N/A
dpu_can_49		6.92368	16.7	CACCAGAA	-4.77632	68	CATTGTG	0	2	66	N/A	N/A
dpu_can_444		6.89211	15.8	TTCCAACA	-3.90789	24	N/A	0	0	24	N/A	N/A
dpu_can_498		6.83421	16.4	TACAAAAA	-4.56579	71	TAATGAG	0	118	-47	N/A	N/A
dpu_can_537		6.79211	15.7	TACCATTT	-3.90789	114	N/A	0	0	114	N/A	N/A
dpu_can_377		6.77105	15.1	ACGCATAT	-3.32895	13	N/A	0	0	13	N/A	N/A
dpu_can_389		6.73421	16.3	TATCAAAA	-4.56579	140	N/A	0	0	140	N/A	N/A
dpu_can_435		6.71053	16.5	AACCTAAA	-4.78947	141	AAATGTA	3.45918	12	129	N/A	N/A
dpu_can_527		6.60263	15.8	TACAATAT	-4.19737	21	N/A	0	0	21	N/A	N/A
dpu_can_554		6.60263	15.3	AACCAACT	-3.69737	112	ATATGTG	3.7449	46	66	N/A	N/A
dpu_can_482		6.55	16.8	GCCCTCAA	-5.25	40	N/A	0	0	40	N/A	N/A
dpu_can_357		6.53421	16.6	AATCAAAA	-5.06579	40	N/A	0	0	40	N/A	N/A
dpu_can_320		6.50263	15.7	TAACATAT	-4.19737	121	N/A	0	0	121	N/A	N/A
dpu_can_541		6.50263	15.7	TATCATAT	-4.19737	23	N/A	0	0	23	N/A	N/A
dpu_can_511		6.40263	16.1	AACAATAT	-4.69737	107	ATATGGG	0	93	14	N/A	N/A
dpu_can_506		6.35789	16.2	TCCAATAG	-4.84211	97	GAGTGTG	0	29	68	N/A	N/A
dpu_can_571		6.29211	15.2	TACCATGT	-3.90789	88	CCATGTG	0	87	1	N/A	N/A
dpu_can_164		6.23421	16.3	AACTAAAA	-5.06579	72	AAATATG	3.45918	68	4	N/A	N/A
dpu_can_489		6.19211	16.6	ATCTATAA	-5.40789	141	AAATGTA	3.45918	115	26	N/A	N/A
dpu_can_500		6.18158	16.3	ATCCATGA	-5.11842	6	TGATGTG	0	114	-108	N/A	N/A
dpu_can_449		6.13421	15.7	TATCAAAA	-4.56579	139	N/A	0	0	139	N/A	N/A
dpu_can_488		6.03421	16.6	TACCAGCA	-5.56579	55	N/A	0	0	55	N/A	N/A
dpu_can_382		6.00263	15.7	AACAATAT	-4.69737	3	AATGGTG	0	123	-120	N/A	N/A
dpu_can_447		6.00263	15.7	AACTATAT	-4.69737	19	GATTGTG	0	111	-92	N/A	N/A
dpu_can_567		6.00263	15.2	TACTATAT	-4.19737	107	ATCTGTG	0	37	70	N/A	N/A
dpu_can_187		5.99211	15.9	TTCTATAA	-4.90789	90	N/A	0	0	90	N/A	N/A
dpu_can_139		5.99211	15.4	AACCATGT	-4.40789	43	GAATGTG	3.7449	60	-17	N/A	N/A
dpu_can_514		5.93421	16	AATCAAAA	-5.06579	111	AATTGTG	3.7449	56	55	N/A	N/A
dpu_can_245		5.85263	15.3	ACCCACTT	-4.44737	141	N/A	0	0	141	N/A	N/A
dpu_can_442		5.80263	16	CACCATTA	-5.19737	48	AATTGTG	3.7449	105	-57	N/A	N/A
dpu_can_385		5.73421	15.8	AATCAAAA	-5.06579	5	N/A	0	0	5	N/A	N/A
dpu_can_536		5.63421	15.7	AAACAAAA	-5.06579	106	N/A	0	0	106	N/A	N/A
dpu_can_366		5.53421	15.1	TACTAAAA	-4.56579	74	N/A	0	0	74	N/A	N/A
dpu_can_383		5.49211	15.4	TTACATAA	-4.90789	92	N/A	0	0	92	N/A	N/A
dpu_can_588		5.44737	15	TTCCATAC	-4.55263	33	N/A	0	0	33	N/A	N/A
dpu_can_589		5.44737	15	TTCCATAC	-4.55263	31	N/A	0	0	31	N/A	N/A
dpu_can_312		5.4	20.4	N/A	-10	0	TAATGTG	3.7449	82	-82	N/A	N/A
dpu_can_422		5.31053	15.1	AACCTAAA	-4.78947	141	AAATGTA	3.45918	13	128	N/A	N/A
dpu_can_560		5.23421	15.3	AAACAAAA	-5.06579	92	N/A	0	0	92	N/A	N/A
dpu_can_423		5.21053	15	AACCTAAA	-4.78947	14	N/A	0	0	14	N/A	N/A
dpu_can_544		5.19211	15.6	ATGCATAA	-5.40789	38	AAATGAG	3.7449	85	-47	N/A	N/A
dpu_can_416		5.06842	15.2	GACCATAC	-5.13158	19	N/A	0	0	19	N/A	N/A
dpu_can_579		4.69211	15.1	ATCAATAA	-5.40789	13	N/A	0	0	13	N/A	N/A
dpu_can_306		4.6	19.6	N/A	-10	0	N/A	0	0	0	N/A	N/A
dpu_can_414		4.37105	15.2	AACCTCAT	-5.82895	81	AATGGTG	0	111	-30	N/A	N/A
dpu_can_315		4.3	19.3	N/A	-10	0	N/A	0	0	0	N/A	N/A
dpu_can_161		4	19	N/A	-10	0	N/A	0	0	0	N/A	N/A
dpu_can_455		3.2	18.2	N/A	-10	0	TATTGTG	0	87	-87	N/A	N/A
dpu_can_457		3.2	18.2	N/A	-10	0	AGAAGTG	0	39	-39	N/A	N/A
dpu_can_459		3.1	18.1	N/A	-10	0	N/A	0	0	0	N/A	N/A
dpu_can_461		2.8	17.8	N/A	-10	0	ATAAGTG	0	87	-87	N/A	N/A
dpu_can_262		2.7	17.7	N/A	-10	0	TAATGTG	3.7449	52	-52	N/A	N/A
dpu_can_463		2.7	17.7	N/A	-10	0	TTATGTG	0	56	-56	N/A	N/A
dpu_can_314		2.6	17.6	N/A	-10	0	N/A	0	0	0	N/A	N/A
dpu_can_352		2.6	17.6	N/A	-10	0	CAATGGG	0	96	-96	N/A	N/A
dpu_can_249		2.5	17.5	N/A	-10	0	N/A	0	0	0	N/A	N/A
dpu_can_466		2.5	17.5	N/A	-10	0	TAATGGG	0	130	-130	N/A	N/A
dpu_can_467		2.5	17.5	N/A	-10	0	AACTGTG	3.7449	47	-47	N/A	N/A
dpu_can_433		2.1	17.1	N/A	-10	0	N/A	0	0	0	N/A	N/A
dpu_can_474		2.1	17.1	N/A	-10	0	ATAAGTG	0	106	-106	N/A	N/A
dpu_can_361		2	17	N/A	-10	0	N/A	0	0	0	N/A	N/A
dpu_can_484		1.8	16.8	N/A	-10	0	N/A	0	0	0	N/A	N/A
dpu_can_485		1.7	16.7	N/A	-10	0	N/A	0	0	0	N/A	N/A
dpu_can_333		1.5	16.5	N/A	-10	0	N/A	0	0	0	N/A	N/A
dpu_can_491		1.5	16.5	N/A	-10	0	N/A	0	0	0	N/A	N/A
dpu_can_492		1.5	16.5	N/A	-10	0	TAATGGG	0	75	-75	N/A	N/A
dpu_can_497		1.4	16.4	N/A	-10	0	AAGGGTG	0	6	-6	N/A	N/A
dpu_can_368		1.3	16.3	N/A	-10	0	N/A	0	0	0	N/A	N/A
dpu_can_501		1.3	16.3	N/A	-10	0	N/A	0	0	0	N/A	N/A
dpu_can_502		1.3	16.3	N/A	-10	0	AAATATG	3.45918	26	-26	N/A	N/A
dpu_can_516		1	16	N/A	-10	0	AAATGAG	3.7449	119	-119	N/A	N/A
dpu_can_520		1	16	N/A	-10	0	AAAGGAG	0	101	-101	N/A	N/A
dpu_can_524		0.8	15.8	N/A	-10	0	AATTGTG	3.7449	25	-25	N/A	N/A
dpu_can_525		0.8	15.8	N/A	-10	0	N/A	0	0	0	N/A	N/A
dpu_can_336		0.7	15.7	N/A	-10	0	N/A	0	0	0	N/A	N/A
dpu_can_446		0.7	15.7	N/A	-10	0	GAAGGTG	0	124	-124	N/A	N/A
dpu_can_540		0.7	15.7	N/A	-10	0	AAATGTG	13.5714	8	-8	N/A	N/A
dpu_can_405		0.6	15.6	N/A	-10	0	N/A	0	0	0	N/A	N/A
dpu_can_547		0.6	15.6	N/A	-10	0	AAAAGTG	3.7449	115	-115	N/A	N/A
dpu_can_376		0.5	15.5	N/A	-10	0	AAATGTC	3.45918	4	-4	N/A	N/A
dpu_can_550		0.5	15.5	N/A	-10	0	ACAAGTG	0	83	-83	N/A	N/A
dpu_can_330		0.4	15.4	N/A	-10	0	AATAGTG	0	4	-4	N/A	N/A
dpu_can_337		0.4	15.4	N/A	-10	0	N/A	0	0	0	N/A	N/A
dpu_can_409		0.4	15.4	N/A	-10	0	TATTGTG	0	112	-112	N/A	N/A
dpu_can_559		0.3	15.3	N/A	-10	0	TAATGAG	0	62	-62	N/A	N/A
dpu_can_561		0.3	15.3	N/A	-10	0	AAATGTT	3.45918	21	-21	N/A	N/A
dpu_can_132		0.2	15.2	N/A	-10	0	N/A	0	0	0	N/A	N/A
dpu_can_419		0.1	15.1	N/A	-10	0	AAATGTA	3.45918	15	-15	N/A	N/A
dpu_can_420		0.1	15.1	N/A	-10	0	AAATGTA	3.45918	15	-15	N/A	N/A
dpu_can_577		0.1	15.1	N/A	-10	0	AATTGTG	3.7449	2	-2	N/A	N/A
dpu_can_584		0.1	15.1	N/A	-10	0	N/A	0	0	0	N/A	N/A
dpu_can_586		0.1	15.1	N/A	-10	0	TAATGTG	3.7449	116	-116	N/A	N/A
dpu_can_587		0	15	N/A	-10	0	N/A	0	0	0	N/A	N/A

## Sheet: D. lacteum
		Classifier summary									Read counts			Expression validation
Class I RNA candidate	Name	classifier score	CM score	DUSE_seq	duse_score	duse_dist	TGTG-box_seq	TGTG-box_score	TGTG-box_dist	inter_dist	Dla_0h_A	Dla_12h_A	Dla_16h_A	Read coverage	Northern blot
dla_can_1	DlaR-1	67.7132	50.7	AACCATAA	12.0132	58	N/A	0	0	58	28957	57445	38734	1	DlaR-1
dla_can_4	DlaR-2	66.2132	49.2	AACCATAA	12.0132	62	N/A	0	0	62	43596	56337	46067	1
dla_can_2	DlaR-3	64.5132	47.5	AACCATAA	12.0132	62	AAATTTG	3.45918	70	-8	3966	8263	6816	1
dla_can_5	DlaR-4	64.3132	47.3	AACCATAA	12.0132	60	N/A	0	0	60	11729	12131	7124	1
dla_can_3	DlaR-5	62.0816	43.7	ACCCATAA	13.3816	58	AATTGAG	0	85	-27	35737	51300	40819	1	DlaR-5
dla_can_6	DlaR-6	59.8132	42.8	AACCATAA	12.0132	60	AAATGTG	13.5714	12	48	32454	46952	53388	1
dla_can_7	DlaR-7	59.2132	42.2	AACCATAA	12.0132	60	AAATTTG	3.45918	27	33	6961	12143	13885	1
dla_can_11	DlaR-8	58.9132	41.9	AACCATAA	12.0132	61	AACTGAG	0	87	-26	848	946	764	1
dla_can_9	DlaR-9	58.9132	41.9	AACCATAA	12.0132	61	N/A	0	0	61	33590	51749	34762	1
dla_can_87	DlaR-10	58.8132	41.8	AACCATAA	12.0132	59	AAATGTT	3.45918	74	-15	467	576	319	1
dla_can_85	DlaR-11	58.3132	41.3	AACCATAA	12.0132	58	N/A	0	0	58	175384	230310	190526	1
dla_can_27	DlaR-12	56.1132	39.1	AACCATAA	12.0132	60	TAATGTG	3.7449	56	4	1989	2136	1817	1
dla_can_26	DlaR-13	53.3132	36.3	AACCATAA	12.0132	61	TAATGTG	3.7449	57	4	26026	34811	29468	1
dla_can_88	DlaR-14	50.1132	32.6	TACCATAA	12.5132	60	CACTGTG	0	121	-61	1160	1933	1229	1
dla_can_46	DlaR-15	46.8605	32.4	TCCCATAT	9.46053	58	N/A	0	0	58	15820	10002	4786	1
dla_can_405	DlaR-16	37.8816	19	TCCCATAA	13.8816	63	AAGTGAG	0	0	63	48	58	52	1
dla_can_190	DlaR-17	35.9132	18.9	AACCATAA	12.0132	58	N/A	0	0	58	5253	33144	20968	1
dla_can_418	DlaR-18	34.9816	16.6	ACCCATAA	13.3816	116	AAATTTG	3.45918	55	61	0	0	0	0
dla_can_199	DlaR-19	32.9816	20.6	TTCCATAA	7.38158	59	N/A	0	0	59	882	1314	826	1
dla_can_156	DlaR-20	32.3816	20	TTCCATAA	7.38158	62	AAAAGTG	3.7449	17	45	675	862	517	1
dla_can_463		31.9053	15.8	TACCACAA	11.1053	61	CAAGGTG	0	57	4	0	0	0	0
dla_can_113		28.5237	16.3	AACCAAAA	7.22368	60	N/A	0	0	60	0	0	0	0
dla_can_481		27.5237	15.3	AACCAAAA	7.22368	57	N/A	0	0	57	1	0	0	0
dla_can_473		26.479	15.4	TACCATAG	6.07895	56	AGATGGG	0	126	-70	0	0	0	0
dla_can_404		26.2053	20.1	TACCACAA	11.1053	9	AGTTGTG	0	21	-12	0	0	0	0
dla_can_176		25.9132	24.9	TACCATCA	6.01316	93	AATGGTG	0	117	-24	1	1	0	0
dla_can_273		25.6132	15.1	AACCATCA	5.51316	135	AAATGTA	3.45918	73	62	0	0	0	0
dla_can_498		25.0053	18.9	TACCACAA	11.1053	50	AATTGTG	3.7449	45	5	1	0	0	0
dla_can_442		24.9816	16.6	ACCCATAA	13.3816	40	N/A	0	0	40	0	0	0	0
dla_can_432		24.6132	17.6	AACCATAA	12.0132	41	N/A	0	0	41	0	0	0	0
dla_can_407		24.5053	18.4	TACCACAA	11.1053	91	N/A	0	0	91	0	0	0	0
dla_can_204		24.2237	22	AACCAAAA	7.22368	126	N/A	0	0	126	0	0	0	0
dla_can_454		23.1132	16.1	AACCATAA	12.0132	88	AAATATG	3.45918	77	11	0	0	0	0
dla_can_253		23.1053	17	TACCACAA	11.1053	65	N/A	0	0	65	0	0	0	0
dla_can_266		22.8605	18.9	ACCCATAT	8.96053	125	GAAGGTG	0	94	31	0	0	1	0
dla_can_171		22.5789	22	AACCATAG	5.57895	102	N/A	0	0	102	0	0	0	0
dla_can_374		21.9237	17.2	AAACATAA	-0.276316	59	N/A	0	0	59	1	0	0	0
dla_can_381		21.8053	15.7	TACCACAA	11.1053	66	N/A	0	0	66	5	0	0	0
dla_can_172		21.7526	25.7	ATCCACAT	1.05263	65	AAATGTT	3.45918	129	-64	0	0	0	0
dla_can_251		21.6842	20	TACCACAT	6.68421	28	AATTGTG	3.7449	142	-114	0	0	0	0
dla_can_276		21.6816	19.3	TTCCATAA	7.38158	53	N/A	0	0	53	0	0	0	0
dla_can_362		21.6158	18.3	AACAACAA	-1.68421	63	N/A	0	0	63	2	0	0	0
dla_can_376		21.5053	15.9	AACCACAA	10.6053	132	AAACGTG	3.7449	45	87	0	0	0	0
dla_can_328		21.3842	16.2	TCACACAA	0.184211	57	N/A	0	0	57	0	1	0	0
dla_can_346		21.1053	15.5	AACCACAA	10.6053	30	CAAAGTG	0	102	-72	0	0	0	0
dla_can_86		21.1	36.1	N/A	-10	0	AAATGTT	3.45918	2	-2	0	0	0	0
dla_can_321		20.1237	17.9	AACCAAAA	7.22368	15	N/A	0	0	15	2	0	0	0
dla_can_438		20.0921	17	TACCATAT	8.09211	18	GAATGTG	3.7449	106	-88	0	0	0	0
dla_can_290		20.0237	17.3	TACCAAAA	7.72368	24	N/A	0	0	24	0	0	0	0
dla_can_312		19.8711	20.7	AACCACAG	4.17105	8	N/A	0	0	8	5	1	2	0
dla_can_349		19.7921	16.2	ACCCAAAA	8.59211	140	N/A	0	0	140	0	0	0	0
dla_can_258		19.7737	18.8	TTCCACAA	5.97368	65	N/A	0	0	65	5	0	0	0
dla_can_379		19.7605	15.8	ACCCATAT	8.96053	89	N/A	0	0	89	0	0	1	0
dla_can_355		19.5921	16.5	TACCATAT	8.09211	16	AAATCTG	3.45918	96	-80	0	0	0	0
dla_can_296		19.4237	16.7	TACCAAAA	7.72368	119	N/A	0	0	119	3	0	0	0
dla_can_441		19.1921	16.6	AACCATAT	7.59211	71	AAATGTA	3.45918	29	42	0	0	0	0
dla_can_94		19.1237	22.9	TACCAACA	1.22368	73	TAAAGTG	0	135	-62	0	0	0	0
dla_can_420		18.9921	16.4	AACCATAT	7.59211	117	N/A	0	0	117	0	0	0	0
dla_can_313		18.9026	21.1	AACCAAAT	2.80263	115	N/A	0	0	115	0	0	0	0
dla_can_249		18.8921	21.8	ATCCAAAA	2.09211	117	AAATCTG	3.45918	129	-12	0	0	0	0
dla_can_335		18.7816	16.4	TTCCATAA	7.38158	88	N/A	0	0	88	0	0	0	0
dla_can_286		18.6026	17.3	ACCTAAAA	-3.69737	56	N/A	0	0	56	0	0	0	0
dla_can_272		18.5921	15.5	TACCATAT	8.09211	142	AATTGAG	0	130	12	0	0	0	0
dla_can_314		18.2921	21.7	TCCAATAA	1.59211	26	N/A	0	0	26	6	2	0	0
dla_can_315		18.2921	21.7	TCCAATAA	1.59211	26	AAATGTT	3.45918	118	-92	3	1	0	0
dla_can_252		18.2605	20.3	TTCCATAT	2.96053	102	AAATGTA	3.45918	139	-37	0	0	0	0
dla_can_470		18.2237	15.5	TACCAAAA	7.72368	14	AAATGTA	3.45918	9	5	0	0	0	0
dla_can_472		18.2237	15.5	TACCAAAA	7.72368	133	N/A	0	0	133	0	0	0	0
dla_can_303		18.1237	15.9	AACCAAAA	7.22368	103	N/A	0	0	103	0	0	0	0
dla_can_179		18.0921	20.5	TTCCAAAA	2.59211	1	AAATGTA	3.45918	20	-19	0	0	0	0
dla_can_459		18.0237	15.8	AACCAAAA	7.22368	22	AATGGTG	0	82	-60	0	0	0	0
dla_can_408		17.4711	17.8	TCCCAAAT	4.67105	25	N/A	0	0	25	0	0	0	0
dla_can_333		17.4237	16.7	TACCAAGA	-4.27632	61	N/A	0	0	61	0	0	0	0
dla_can_109		17.2737	21.3	CACCACAT	0.973684	124	N/A	0	0	124	0	0	0	0
dla_can_260		17.2132	16.7	AACCATCA	5.51316	50	AATTGCG	0	122	-72	1	0	0	0
dla_can_422		17.1132	16.1	TACCATCA	6.01316	30	AAATCTG	3.45918	42	-12	0	0	0	0
dla_can_248		17.071	25.4	ACCAATAT	-3.32895	139	N/A	0	0	139	0	0	0	0
dla_can_430		16.9132	15.9	TACCATCA	6.01316	28	AAACGTG	3.7449	20	8	1	0	0	0
dla_can_457		16.8132	15.8	TACCATCA	6.01316	4	N/A	0	0	4	0	0	0	0
dla_can_449		16.7947	16.4	CACCACAA	5.39474	99	GCATGTG	0	141	-42	0	0	0	0
dla_can_274		16.55	17.8	GCCCATAT	3.75	106	TAATGGG	0	88	18	1	0	0	0
dla_can_275		16.3921	18.8	TTCCAAAA	2.59211	44	TAATGAG	0	62	-18	1	0	0	0
dla_can_339		16.3026	19	TCCCAGAA	2.30263	54	AAATGTC	3.45918	112	-58	0	0	0	0
dla_can_452		16.2921	16.2	TTTCATAA	-4.90789	101	AAAAGAG	0	40	61	2	0	0	0
dla_can_235		16.0921	19	ATCCAAAA	2.09211	41	AAATATG	3.45918	74	-33	0	0	0	0
dla_can_371		16.0132	15.5	AACCATCA	5.51316	5	AAGCGTG	0	131	-126	0	1	0	0
dla_can_387		15.8947	15.5	CACCACAA	5.39474	23	AAATGTT	3.45918	93	-70	0	0	0	0
dla_can_393		15.6737	15.2	ATCCACAA	5.47368	132	N/A	0	0	132	0	0	0	0
dla_can_484		15.6342	15.2	TACAAAAA	-4.56579	125	AGGTGTG	0	67	58	0	0	0	0
dla_can_174		15.5237	20.8	AAACATAA	-0.276316	83	AACTGTG	3.7449	78	5	0	0	0	0
dla_can_412		15.4026	17.6	AACCAAAT	2.80263	39	N/A	0	0	39	4	2	1	0
dla_can_108		15.1632	19.9	CCCCACCA	0.263158	54	AGAGGTG	0	0	54	0	0	0	0
dla_can_212		15.0921	18.5	TCCAATAA	1.59211	15	AAATGAG	3.7449	137	-122	0	0	0	0
dla_can_414		15.0605	17.1	TTCCATAT	2.96053	103	GAATGTG	3.7449	116	-13	0	0	0	0
dla_can_486		15.0342	15.1	AATCAAAA	-5.06579	141	AAATGTT	3.45918	80	61	0	0	0	0
dla_can_458		14.971	15.8	AACCACAG	4.17105	48	ACAGGTG	0	39	9	0	0	0	0
dla_can_468		14.8711	15.7	AACCACAG	4.17105	142	ACAGGTG	0	37	105	0	0	0	0
dla_can_494		14.671	15	TACCCCAT	-5.32895	59	GAATGAG	0	140	-81	0	0	0	0
dla_can_257		14.5816	18.7	TTCCATCA	0.881579	108	AAACGAG	0	101	7	0	0	0	0
dla_can_65		14.4816	18.6	TTCCATCA	0.881579	52	GACTGTG	0	135	-83	0	0	0	0
dla_can_476		14.4053	15.3	AACCACCA	4.10526	54	N/A	0	0	54	0	0	0	0
dla_can_277		14.0921	17	ATCCAAAA	2.09211	110	AAATCTG	3.45918	106	4	1	0	0	0
dla_can_409		13.9921	17.9	ACCAATAA	1.09211	90	AAATGAG	3.7449	124	-34	2	3	1	0
dla_can_431		13.9237	17.7	TACCAACA	1.22368	119	N/A	0	0	119	0	0	0	0
dla_can_433		13.8816	17.5	ACCCATTA	1.38158	78	N/A	0	0	78	0	0	0	0
dla_can_210		13.7842	18.6	TCTCACAA	0.184211	18	AATTGTG	3.7449	13	5	0	0	0	0
dla_can_197		13.7026	15.9	AACCAAAT	2.80263	24	N/A	0	0	24	3	1	0	0
dla_can_497		13.6237	18.9	AACAATAA	-0.276316	133	N/A	0	0	133	0	0	0	0
dla_can_363		13.5921	16	TTCCAAAA	2.59211	130	N/A	0	0	130	0	0	0	0
dla_can_499		13.3132	17.8	TACCATTA	0.513158	134	AAATGTA	3.45918	110	24	3	0	0	0
dla_can_255		13.1816	22.3	GCCAATAA	-4.11842	125	N/A	0	0	125	0	0	0	0
dla_can_466		13.1605	15.7	ATCCATAT	2.46053	120	GAAGGTG	0	80	40	5	1	0	0
dla_can_329		13.1158	19.3	TACAACAA	-1.18421	94	N/A	0	0	94	19	5	1	0
dla_can_219		13.0158	19.2	TATCACAA	-1.18421	117	AATTGGG	0	102	15	0	0	0	0
dla_can_325		12.8816	16.5	ACCCATTA	1.38158	15	N/A	0	0	15	0	0	0	0
dla_can_327		12.7921	16.7	ACACATAA	1.09211	101	AAAAGTG	3.7449	74	27	0	0	0	0
dla_can_445		12.6921	16.6	ACACATAA	1.09211	2	AAATGTA	3.45918	88	-86	0	0	0	0
dla_can_332		12.6816	15.3	GACCATAT	2.38158	140	N/A	0	0	140	1	0	0	0
dla_can_439		12.65	16.9	TGCCACAA	0.75	66	N/A	0	0	66	0	0	0	0
dla_can_307		12.5921	15.5	ATCCAAAA	2.09211	28	AAATATG	3.45918	24	4	2	0	0	0
dla_can_403		12.5921	15	TTCCAAAA	2.59211	33	AAATTTG	3.45918	96	-63	0	0	0	0
dla_can_386		12.5132	15.5	CACCAAAA	2.01316	43	N/A	0	0	43	2	0	0	0
dla_can_444		12.4816	16.6	TTCCATCA	0.881579	4	AAATGGG	3.7449	110	-106	2	0	0	0
dla_can_396		12.4605	15	ATCCATAT	2.46053	122	N/A	0	0	122	3	2	0	0
dla_can_318		12.3158	18.5	TACAACAA	-1.18421	133	N/A	0	0	133	0	0	0	0
dla_can_269		12.3132	17.3	AACCATTA	0.0131579	115	ATCTGTG	0	1	114	0	0	0	0
dla_can_320		12.2395	17.2	ACCCACAC	0.0394737	95	TAATGAG	0	11	84	1	1	0	0
dla_can_211		12.1237	16.9	TACAATAA	0.223684	129	TAATGGG	0	111	18	0	0	0	0
dla_can_341		12.0526	16	ATCCACAT	1.05263	69	N/A	0	0	69	0	0	0	0
dla_can_382		12.0237	15.8	TACCAACA	1.22368	70	N/A	0	0	70	4	0	0	0
dla_can_353		11.8395	16.3	TCCCACAC	0.539474	39	AAATGTT	3.45918	117	-78	0	0	0	0
dla_can_435		11.8237	17.1	AATCATAA	-0.276316	134	TGATGTG	0	96	38	0	0	0	0
dla_can_395		11.7921	15.2	TCCAATAA	1.59211	134	N/A	0	0	134	0	0	0	0
dla_can_488		11.7711	15.1	CCCCATCA	1.67105	107	N/A	0	0	107	0	0	0	0
dla_can_311		11.7474	21.8	ACCCATCC	-5.05263	124	AAATGTT	3.45918	98	26	1	0	0	0
dla_can_265		11.7158	18.4	AATCACAA	-1.68421	75	TAATGTG	3.7449	136	-61	0	0	0	0
dla_can_336		11.6921	15.1	TCCAATAA	1.59211	80	N/A	0	0	80	0	0	0	0
dla_can_450		11.6237	16.4	TATCATAA	0.223684	108	N/A	0	0	108	0	0	0	0
dla_can_19		11.6237	16.4	TACAATAA	0.223684	39	AATTGTG	3.7449	54	-15	0	0	0	0
dla_can_460		11.5237	15.8	AACCAACA	0.723684	72	N/A	0	0	72	0	0	0	0
dla_can_477		11.3921	15.3	ACCAATAA	1.09211	23	N/A	0	0	23	0	0	0	0
dla_can_351		11.3132	15.8	TACCATTA	0.513158	43	N/A	0	0	43	1	0	0	0
dla_can_344		11.2842	16.1	TCCAACAA	0.184211	89	N/A	0	0	89	2	0	0	0
dla_can_443		11.2842	16.6	ACACACAA	-0.315789	54	AAATTTG	3.45918	119	-65	0	0	0	0
dla_can_413		11.2158	17.4	TATCACAA	-1.18421	74	AAATGGG	3.7449	126	-52	0	0	0	0
dla_can_348		11.2132	16.2	AACCATGA	0.0131579	130	TAATGGG	0	109	21	0	0	0	0
dla_can_372		11.1237	15.4	AACCAACA	0.723684	68	AAATGTG	13.5714	79	-11	0	0	0	0
dla_can_447		11.0395	16.5	TTCCACAG	-0.460526	136	N/A	0	0	136	7	2	1	0
dla_can_338		11.0237	16.3	AAACATAA	-0.276316	37	TAATGTG	3.7449	117	-80	1	0	0	0
dla_can_464		10.8842	15.7	TCTCACAA	0.184211	46	AAATGTG	13.5714	65	-19	0	0	0	0
dla_can_453		10.8237	16.1	AACAATAA	-0.276316	136	N/A	0	0	136	0	0	0	0
dla_can_361		10.8237	15.6	TAGCATAA	0.223684	6	N/A	0	0	6	0	0	0	0
dla_can_469		10.8237	15.6	TACGATAA	0.223684	16	N/A	0	0	16	4	0	0	0
dla_can_461		10.8132	15.8	AACCATGA	0.0131579	36	AAAAGAG	0	50	-14	2	0	0	0
dla_can_392		10.8	15.3	TACCCTAA	0.5	33	AATTGTG	3.7449	43	-10	0	0	0	0
dla_can_192		10.7842	16.1	ACACACAA	-0.315789	55	AAAAGAG	0	49	6	0	0	0	0
dla_can_358		10.7237	15	AACCAACA	0.723684	67	N/A	0	0	67	0	0	0	0
dla_can_316		10.7026	19.9	TATCATAT	-4.19737	79	N/A	0	0	79	0	0	0	0
dla_can_398		10.6132	15.1	TACCATGA	0.513158	92	ACATGTG	3.7449	125	-33	0	0	0	0
dla_can_421		10.4789	16.4	AACCATCG	-0.921053	107	ACTTGTG	0	58	49	0	0	0	0
dla_can_345		10.471	18.8	ACACATAT	-3.32895	16	AAAAGAG	0	32	-16	0	0	0	0
dla_can_436		10.4158	17.1	AACAACAA	-1.68421	13	AAAAGAG	0	2	11	0	0	0	0
dla_can_446		10.3158	16.5	TACTACAA	-1.18421	140	ATAAGTG	0	89	51	0	0	0	0
dla_can_185		10.3026	19.5	TACTATAT	-4.19737	73	N/A	0	0	73	1	0	0	0
dla_can_319		10.2158	16.9	AACAACAA	-1.68421	96	AAATATG	3.45918	114	-18	0	0	0	0
dla_can_146		10.171	16.5	AACCACAC	-1.32895	29	AAATGAG	3.7449	111	-82	0	0	0	0
dla_can_180		10.1237	15.4	AATCATAA	-0.276316	119	AAAAGTG	3.7449	96	23	0	0	0	0
dla_can_390		10.1237	15.4	AAACATAA	-0.276316	16	N/A	0	0	16	0	0	0	0
dla_can_217		10.0237	15.3	AAACATAA	-0.276316	90	AAATTTG	3.45918	128	-38	0	0	0	0
dla_can_391		10.0237	15.3	AACAATAA	-0.276316	86	AAATGTT	3.45918	33	53	0	0	0	0
dla_can_406		9.96053	18.5	TTCCATCT	-3.53947	49	N/A	0	0	49	0	0	0	0
dla_can_483		9.92368	15.2	AACAATAA	-0.276316	127	N/A	0	0	127	0	0	0	0
dla_can_334		9.91579	16.6	AACTACAA	-1.68421	10	AACTGTG	3.7449	81	-71	1	0	0	0
dla_can_487		9.82368	15.1	AACAATAA	-0.276316	129	CAATGCG	0	33	96	0	0	0	0
dla_can_400		9.78421	15.1	AACCACCT	-0.315789	32	AAAAGGG	0	53	-21	0	0	0	0
dla_can_110		9.69211	20.1	ACTCATCA	-5.40789	70	N/A	0	0	70	0	0	0	0
dla_can_186		9.67105	17	ACCCAACT	-2.32895	120	ACATGTG	3.7449	39	81	0	0	0	0
dla_can_474		9.57105	15.4	TACCACAC	-0.828947	113	N/A	0	0	113	1	0	0	0
dla_can_188		9.21579	15.4	TACTACAA	-1.18421	34	AATTGAG	0	28	6	0	0	0	0
dla_can_223		9.20263	17.9	ACACAAAA	-3.69737	71	ACAGGTG	0	111	-40	0	0	0	0
dla_can_337		9.11579	15.8	AACAACAA	-1.68421	29	AAATCTG	3.45918	130	-101	0	0	0	0
dla_can_377		9.11579	15.8	AAGCACAA	-1.68421	93	GAATGTG	3.7449	45	48	0	0	0	0
dla_can_259		9.02368	18.3	TACCAAGA	-4.27632	100	AAAGGAG	0	126	-26	14	0	0	0
dla_can_380		9.01579	15.7	AATCACAA	-1.68421	48	AAATTTG	3.45918	114	-66	0	0	0	0
dla_can_465		9.01579	15.7	AATCACAA	-1.68421	129	ATATGAG	0	79	50	1	0	0	0
dla_can_373		9.00526	15.4	AACCACTA	-1.39474	107	CAAAGTG	0	57	50	0	0	0	0
dla_can_378		8.97105	15.8	TTCCAAAT	-1.82895	9	AAATGTT	3.45918	67	-58	1	0	0	0
dla_can_173		8.93421	19	AAACAAAA	-5.06579	43	AAATTTG	3.45918	72	-29	0	0	0	0
dla_can_317		8.92368	18.7	AACCAATA	-4.77632	135	GAAGGTG	0	88	47	2	1	1	0
dla_can_437		8.88158	17	CTCCAAAA	-3.11842	42	AAATGTT	3.45918	38	4	0	0	0	0
dla_can_368		8.84737	16.4	TCCCCTAT	-2.55263	22	AAATGTC	3.45918	82	-60	1	0	0	0
dla_can_471		8.67105	15.5	TTCCAAAT	-1.82895	49	AAAGGTG	3.7449	85	-36	0	0	0	0
dla_can_267		8.60263	17.8	TACAATAT	-4.19737	65	N/A	0	0	65	2	0	0	0
dla_can_149		8.57105	15.9	ATCCAAAT	-2.32895	37	AAATGTC	3.45918	6	31	0	0	1	0
dla_can_203		8.41579	15.1	AACTACAA	-1.68421	104	N/A	0	0	104	0	0	0	0
dla_can_402		8.31579	15	AACTACAA	-1.68421	78	ACCTGTG	0	89	-11	0	0	0	0
dla_can_230		8.15789	17.5	ATCCAAAG	-4.34211	0	N/A	0	0	0	0	0	0	0
dla_can_416		8.07105	16.4	ACCAATAT	-3.32895	3	N/A	0	0	3	0	0	0	0
dla_can_326		8.00263	17.2	TATCATAT	-4.19737	88	ATCTGTG	0	15	73	0	0	0	0
dla_can_215		7.93421	17.5	TATCAAAA	-4.56579	141	N/A	0	0	141	0	0	0	0
dla_can_347		7.90263	17.6	AAACATAT	-4.69737	18	AAAAGAG	0	5	13	0	0	0	0
dla_can_287		7.70263	16.4	ACCTAAAA	-3.69737	38	ATAAGTG	0	74	-36	0	0	0	0
dla_can_417		7.69211	16.6	TACCATTT	-3.90789	126	N/A	0	0	126	0	0	0	0
dla_can_411		7.69211	17.6	TTACATAA	-4.90789	20	N/A	0	0	20	1	0	0	0
dla_can_410		7.63421	17.7	ACCCCTAG	-5.06579	67	AATAGTG	0	104	-37	3	1	3	0
dla_can_97		7.60263	16.3	ACTCAAAA	-3.69737	2	N/A	0	0	2	2	0	0	0
dla_can_91		7.5	22.5	N/A	-10	0	N/A	0	0	0	0	0	0	0
dla_can_193		7.27105	17.6	TACCCCAT	-5.32895	73	AAATTTG	3.45918	81	-8	0	0	0	0
dla_can_479		7.10263	15.3	TCACAAAA	-3.19737	12	AAATGTC	3.45918	21	-9	1	0	0	0
dla_can_375		7.09211	16	TACCATTT	-3.90789	71	N/A	0	0	71	0	0	0	0
dla_can_250		7	22	N/A	-10	0	AATTGTG	3.7449	59	-59	0	0	0	0
dla_can_434		6.99211	17.4	ATCAATAA	-5.40789	134	ATACGTG	0	65	69	0	0	0	0
dla_can_429		6.96842	16.1	TCCCAGAG	-4.13158	53	AAATGTT	3.45918	75	-22	1	0	2	0
dla_can_262		6.90263	16.6	AACTATAT	-4.69737	116	AAAAGAG	0	28	88	0	0	0	0
dla_can_388		6.80263	15.5	AACCAACT	-3.69737	76	AATTGGG	0	10	66	0	0	0	0
dla_can_491		6.80263	15	TACCAACT	-3.19737	82	N/A	0	0	82	4	1	0	0
dla_can_456		6.68947	15.9	TACCAAAC	-4.21053	109	N/A	0	0	109	0	0	0	0
dla_can_455		6.68947	15.9	TACCAAAC	-4.21053	21	N/A	0	0	21	0	0	0	0
dla_can_331		6.60263	15.8	TTCCAGAA	-4.19737	54	N/A	0	0	54	0	0	0	0
dla_can_478		6.60263	15.3	ACACAAAA	-3.69737	113	TAAAGTG	0	124	-11	0	0	0	0
dla_can_462		6.56316	15.8	TCCGACAT	-4.23684	26	N/A	0	0	26	0	0	0	0
dla_can_428		6.40263	16.1	AAACATAT	-4.69737	16	AAAAGAG	0	3	13	0	0	0	0
dla_can_451		6.35789	16.2	TCCAATAG	-4.84211	36	CTATGTG	0	70	-34	0	0	0	0
dla_can_254		6.3	21.3	N/A	-10	0	N/A	0	0	0	0	0	0	0
dla_can_268		6.14737	16.2	ACCCATTG	-5.05263	80	AAAAGAG	0	140	-60	0	0	0	0
dla_can_448		6.09211	16.5	ATTCATAA	-5.40789	98	N/A	0	0	98	1	0	0	0
dla_can_492		6.09211	15	TACCATTT	-3.90789	89	CAATGTG	3.7449	12	77	0	0	1	0
dla_can_17		6.02368	15.3	TACCAAGA	-4.27632	74	CAATGTG	3.7449	108	-34	8	0	0	0
dla_can_399		5.86316	15.1	TCCTACAT	-4.23684	93	AACAGTG	0	78	15	4	0	0	0
dla_can_389		5.80263	15.5	AACAATAT	-4.69737	36	AAAAGAG	0	58	-22	0	0	0	0
dla_can_426		5.79211	16.2	ATCTATAA	-5.40789	99	AATCGTG	0	56	43	0	0	0	0
dla_can_401		5.75789	15.1	ATCCAAAG	-4.34211	49	AATTGTG	3.7449	42	7	0	0	0	0
dla_can_350		5.69211	16.1	ATCTATAA	-5.40789	125	N/A	0	0	125	0	0	0	0
dla_can_385		5.64737	15.7	ACCCATTG	-5.05263	48	TAAAGTG	0	73	-25	0	0	0	0
dla_can_397		5.53421	15.1	TACAAAAA	-4.56579	121	AAAAGAG	0	69	52	0	0	0	0
dla_can_482		5.29211	15.2	TTTCATAA	-4.90789	115	AAATGTA	3.45918	62	53	0	0	0	0
dla_can_323		5.2	20.2	N/A	-10	0	GAAAGTG	0	89	-89	0	0	0	0
dla_can_485		5.19211	15.1	TTACATAA	-4.90789	99	AATTGTG	3.7449	25	74	0	0	0	0
dla_can_495		4.8	19.8	N/A	-10	0	AAATGTG	13.5714	107	-107	0	0	0	0
dla_can_116		4.78421	15.1	TACCACGT	-5.31579	134	N/A	0	0	134	0	0	0	0
dla_can_102		4.7	19.7	N/A	-10	0	AATTGAG	0	7	-7	0	0	0	0
dla_can_496		4.1	19.1	N/A	-10	0	TAAAGTG	0	118	-118	0	0	0	0
dla_can_263		3.8	18.8	N/A	-10	0	N/A	0	0	0	0	0	0	0
dla_can_184		3.6	18.6	N/A	-10	0	N/A	0	0	0	0	0	0	0
dla_can_322		3	18	N/A	-10	0	N/A	0	0	0	21	1	0	0
dla_can_342		2.7	17.7	N/A	-10	0	N/A	0	0	0	0	0	0	0
dla_can_324		2.4	17.4	N/A	-10	0	N/A	0	0	0	0	0	0	0
dla_can_101		2.3	17.3	N/A	-10	0	N/A	0	0	0	0	0	0	0
dla_can_37		2.1	17.1	N/A	-10	0	N/A	0	0	0	0	0	0	0
dla_can_440		1.9	16.9	N/A	-10	0	AAATGTT	3.45918	131	-131	0	0	0	0
dla_can_370		1.9	16.9	N/A	-10	0	AAGTGAG	0	51	-51	0	0	0	0
dla_can_280		1.8	16.8	N/A	-10	0	N/A	0	0	0	8	2	5	0
dla_can_415		1.6	16.6	N/A	-10	0	AAAAGGG	0	11	-11	1	0	0	0
dla_can_419		1.5	16.5	N/A	-10	0	AAATTTG	3.45918	126	-126	0	0	0	0
dla_can_330		1.4	16.4	N/A	-10	0	AAATGAG	3.7449	49	-49	0	0	0	0
dla_can_278		1.3	16.3	N/A	-10	0	N/A	0	0	0	0	0	0	0
dla_can_424		1.2	16.2	N/A	-10	0	N/A	0	0	0	0	0	0	0
dla_can_425		1.2	16.2	N/A	-10	0	CATTGTG	0	87	-87	0	0	0	0
dla_can_423		1.2	16.2	N/A	-10	0	AAATTTG	3.45918	41	-41	2	0	0	0
dla_can_293		1.2	16.2	N/A	-10	0	AAATTTG	3.45918	86	-86	0	0	0	0
dla_can_427		1.1	16.1	N/A	-10	0	AAAAGAG	0	5	-5	0	0	0	0
dla_can_300		1.1	16.1	N/A	-10	0	AATAGTG	0	136	-136	0	0	0	0
dla_can_297		1	16	N/A	-10	0	AAATGCG	3.7449	65	-65	0	0	0	0
dla_can_29		0.7	15.7	N/A	-10	0	N/A	0	0	0	0	0	0	0
dla_can_383		0.7	15.7	N/A	-10	0	N/A	0	0	0	0	0	0	0
dla_can_384		0.7	15.7	N/A	-10	0	AATTGTG	3.7449	92	-92	0	0	0	0
dla_can_467		0.7	15.7	N/A	-10	0	N/A	0	0	0	0	0	0	0
dla_can_261		0.6	15.6	N/A	-10	0	N/A	0	0	0	0	0	0	0
dla_can_475		0.4	15.4	N/A	-10	0	AAATGTA	3.45918	87	-87	0	0	0	0
dla_can_256		0.4	15.4	N/A	-10	0	AAATGTA	3.45918	42	-42	0	0	0	0
dla_can_295		0.3	15.3	N/A	-10	0	AAAGGTG	3.7449	10	-10	0	1	0	0
dla_can_291		0.3	15.3	N/A	-10	0	CAATGAG	0	97	-97	0	0	0	0
dla_can_480		0.3	15.3	N/A	-10	0	AAAGGTG	3.7449	50	-50	0	0	0	0
dla_can_394		0.2	15.2	N/A	-10	0	AAAGGAG	0	28	-28	0	0	0	0
dla_can_489		0.1	15.1	N/A	-10	0	N/A	0	0	0	0	0	0	0
dla_can_493		0	15	N/A	-10	0	AAATCTG	3.45918	48	-48	0	0	0	0
dla_can_490		0	15	N/A	-10	0	AATTGTG	3.7449	140	-140	2	1	0	0

## Sheet: P. pallidum
		Classifier summary									Read counts						Expression validation
Class I RNA candidate	Name	classifier score	CM score	DUSE_seq	duse_score	duse_dist	TGTG-box_seq	TGTG-box_score	TGTG-box_dist	inter_dist	Ppa_0h_A	Ppa_0h_B	Ppa_4h_A	Ppa_4h_B	Ppa_14h_A	Ppa_14h_B	Read coverage	Northern blot	Note
ppa_can_4	PpaR-1	71.7132	54.7	AACCATAA	12.0132	59	CAATGAG	0	87	-28	963	956	1915	1053	1008	1137	1	PpaR-1/2
ppa_can_2	PpaR-2	70.9132	53.9	AACCATAA	12.0132	62	N/A	0	0	62	1549	1495	3489	1766	1187	1514	1	PpaR-1/2
ppa_can_9	PpaR-3	69.4132	52.4	AACCATAA	12.0132	62	AAATTTG	3.45918	115	-53	316	311	627	398	210	250	1
ppa_can_3	PpaR-5	65.7132	48.7	AACCATAA	12.0132	61	N/A	0	0	61	766	589	962	514	422	635	1
ppa_can_5	PpaR-4	65.7132	48.7	AACCATAA	12.0132	60	AAATGTT	3.45918	108	-48	1185	885	1677	760	555	696	1
ppa_can_6	PpaR-6	64.8132	47.8	AACCATAA	12.0132	59	AAATGAG	3.7449	106	-47	55	44	76	41	36	41	1		Identical sequence to PpaR-10
ppa_can_96	PpaR-7	63.3132	46.3	AACCATAA	12.0132	62	N/A	0	0	62	38	53	111	75	66	49	1
ppa_can_8	PpaR-8	60.1132	43.1	AACCATAA	12.0132	58	AAATGAG	3.7449	126	-68	330	353	703	429	248	365	1
ppa_can_1	PpaR-9	59.0132	42	AACCATAA	12.0132	58	N/A	0	0	58	7670	6605	7179	4147	3257	4962	1	PpaR-9
ppa_can_7	PpaR-10	52.8	47.8	AACCGTAA	0	58	AAATGTT	3.45918	125	-67	52	54	112	39	47	31	1		Identical sequence to PpaR-6
ppa_can_98	PpaR-11	52.4132	35.4	AACCATAA	12.0132	59	N/A	0	0	59	933	749	1871	746	777	923	1
ppa_can_97	PpaR-12	52.3132	35.3	AACCATAA	12.0132	61	N/A	0	0	61	150	144	277	118	78	109	1
ppa_can_13	PpaR-13	47.8132	30.8	AACCATAA	12.0132	61	AAATTTG	3.45918	33	28	130338	107074	239306	101277	71684	92979	1
ppa_can_10	PpaR-14	43.4132	26.4	AACCATAA	12.0132	59	N/A	0	0	59	4	9	20	3	2	0	1
ppa_can_99	PpaR-15	41.3132	24.3	AACCATAA	12.0132	62	N/A	0	0	62	336	351	505	280	211	269	1
ppa_can_122	PpaR-16	38.9132	21.9	AACCATAA	12.0132	58	AAATGTG	13.5714	52	6	2051	1899	2349	1123	715	875	1
ppa_can_113	PpaR-17	38.7132	21.7	AACCATAA	12.0132	61	N/A	0	0	61	1360	1127	1983	949	602	685	1
ppa_can_104	PpaR-18	35.5132	18.5	AACCATAA	12.0132	59	AAAAGAG	0	72	-13	6277	5799	9951	4244	2176	4022	1
ppa_can_100	PpaR-19	33.9737	33	TTCCACAA	5.97368	106	ATATGAG	0	85	21	0	0	0	0	0	0	0
ppa_can_235		33.371	34.2	ACCCAAAT	4.17105	100	AAAAGTG	3.7449	70	30	0	0	0	0	0	0	0
ppa_can_61		30.4816	18.1	TCCCATCA	7.38158	131	AAATCTG	3.45918	70	61	0	0	0	0	0	0	0
ppa_can_374		28.9921	15.9	TACCATAT	8.09211	63	N/A	0	0	63	0	0	0	0	0	0	0
ppa_can_282		28.5026	16.7	CACCATAA	6.80263	62	AAATGGG	3.7449	140	-78	34	17	72	50	5	2	1
ppa_can_263		28.3237	16.1	AACCAAAA	7.22368	75	AATGGTG	0	13	62	0	0	0	0	0	0	0
ppa_can_434		25.8053	16.7	AACCACCA	4.10526	57	N/A	0	0	57	0	0	0	0	0	0	0
ppa_can_416		25.6921	18.1	TTCCAAAA	2.59211	58	N/A	0	0	58	0	0	0	0	0	0	0
ppa_can_328		25.6026	17.8	AACCAAAT	2.80263	58	AAAGGTG	3.7449	110	-52	0	0	0	0	0	0	0
ppa_can_281		25.1132	17.6	TACCATAA	12.5132	77	TCATGTG	0	119	-42	0	0	0	0	0	0	0
ppa_can_174		25.0816	22.7	TCCCATCA	7.38158	128	N/A	0	0	128	0	0	0	0	0	0	0
ppa_can_303		24.0737	17.1	ACCCACAA	11.9737	22	N/A	0	0	22	0	0	0	0	0	0	0
ppa_can_195		23.7132	16.2	TACCATAA	12.5132	28	AACGGTG	0	66	-38	0	0	0	0	0	0	0
ppa_can_26		22.4816	25.1	CACCATAT	2.38158	100	N/A	0	0	100	0	0	0	0	0	0	0
ppa_can_368		21.6053	16	AACCACAA	10.6053	18	N/A	0	0	18	0	0	0	0	0	0	0
ppa_can_333		21.4737	17	TTCCACCA	-0.526316	56	N/A	0	0	56	0	0	0	0	0	0	0
ppa_can_240		21.1737	20.2	TTCCACAA	5.97368	89	N/A	0	0	89	0	0	0	0	0	0	0
ppa_can_180		20.9816	19.1	ACCCATCA	6.88158	40	N/A	0	0	40	1	0	0	0	0	1	0
ppa_can_443		20.5605	16.1	TCCCATAT	9.46053	98	CATTGTG	0	64	34	0	0	0	0	1	0	0
ppa_can_103		20.5237	15.3	TATCATAA	0.223684	56	N/A	0	0	56	0	0	0	0	0	0	0
ppa_can_373		20.3605	15.9	TCCCATAT	9.46053	98	CATTGTG	0	64	34	0	0	0	0	1	0	0
ppa_can_370		20.3605	15.9	TCCCATAT	9.46053	100	CATTGTG	0	66	34	0	0	0	0	0	0	0
ppa_can_403		20.2	15.2	AACCTTAA	0	57	N/A	0	0	57	0	0	0	0	0	0	0
ppa_can_284		19.4816	17.6	CTCCAAAA	-3.11842	96	AAATGAG	3.7449	37	59	0	0	0	0	0	0	0
ppa_can_307		19.3921	15.8	ACCCAAAA	8.59211	32	N/A	0	0	32	0	0	0	0	0	0	0
ppa_can_201		19.3237	16.6	TACCAAAA	7.72368	112	N/A	0	0	112	0	0	0	0	0	0	0
ppa_can_432		19.071	16.9	TCCGATAT	-2.82895	71	CACTGTG	0	8	63	0	0	0	0	0	0	0
ppa_can_286		18.9237	16.7	AACCAAAA	7.22368	111	N/A	0	0	111	0	0	0	0	0	0	0
ppa_can_260		18.5026	17.2	ACACAAAA	-3.69737	62	CAATGAG	0	31	31	0	0	0	0	0	0	0
ppa_can_348		18.3237	15.6	TACCAAAA	7.72368	17	N/A	0	0	17	0	0	0	0	0	0	0
ppa_can_358		17.7921	15.2	AACCATAT	7.59211	42	N/A	0	0	42	0	0	0	0	0	0	0
ppa_can_220		17.7921	18.2	ACCAATCA	-5.40789	138	AAGTGAG	0	79	59	0	0	0	0	0	0	0
ppa_can_181		17.6026	15.8	CACCATAA	6.80263	66	ATATGTG	3.7449	76	-10	0	0	0	0	0	0	0
ppa_can_405		16.9816	15.1	ATCCATAA	6.88158	81	N/A	0	0	81	0	0	0	0	0	0	0
ppa_can_406		16.9026	15.1	CACCATAA	6.80263	122	N/A	0	0	122	0	0	0	0	0	0	0
ppa_can_188		16.8237	21.6	TATCATAA	0.223684	5	AATTGTG	3.7449	23	-18	0	0	0	0	0	0	0
ppa_can_330		16.7921	17.2	ACCAATCA	-5.40789	56	AAATATG	3.45918	77	-21	0	0	0	0	0	0	0
ppa_can_344		16.1947	15.8	CACCACAA	5.39474	3	N/A	0	0	3	0	0	0	0	0	0	0
ppa_can_356		16.0395	15	TCCCACAG	6.03947	46	AAGCGTG	0	62	-16	0	0	0	0	0	0	0
ppa_can_102		16.0158	22.2	TATCACAA	-1.18421	107	N/A	0	0	107	5	4	3	3	3	4	0
ppa_can_388		15.9132	15.4	AACCATCA	5.51316	82	N/A	0	0	82	0	0	0	0	0	0	0
ppa_can_179		15.8605	17.9	TTCCATAT	2.96053	108	AAATGTA	3.45918	11	97	0	0	0	0	0	0	0
ppa_can_420		15.6605	17.7	TTCCATAT	2.96053	88	GAAGGTG	0	140	-52	0	0	0	0	0	0	0
ppa_can_311		15.6342	15.7	AAACAAAA	-5.06579	60	N/A	0	0	60	0	0	0	0	0	0	0
ppa_can_350		15.5342	15.6	AACTAAAA	-5.06579	59	AAATCTG	3.45918	0	59	0	0	0	0	0	0	0
ppa_can_208		15.5132	18.5	GACCAAAA	2.01316	12	AAATATG	3.45918	74	-62	0	0	0	0	0	0	0
ppa_can_292		15.2579	17.6	TCCCAAAG	2.65789	103	CAATGAG	0	1	102	0	0	0	0	0	0	0
ppa_can_288		15.1921	17.6	TTCCAAAA	2.59211	81	N/A	0	0	81	0	0	0	0	0	0	0
ppa_can_375		14.9053	15.8	AACCACCA	4.10526	73	N/A	0	0	73	0	0	0	0	0	0	0
ppa_can_234		14.9	29.9	N/A	-10	0	GAAGGTG	0	136	-136	0	0	0	0	0	0	0
ppa_can_237		14.8237	20.1	AACAATAA	-0.276316	49	N/A	0	0	49	0	0	0	0	0	0	0
ppa_can_244		14.8132	19.8	AACCATGA	0.0131579	25	N/A	0	0	25	0	0	0	0	0	0	0
ppa_can_114		14.671	21.5	TTCCAAAT	-1.82895	0	N/A	0	0	0	0	0	0	0	0	0	0
ppa_can_277		14.6158	20.8	TACAACAA	-1.18421	33	AACTGTG	3.7449	71	-38	0	0	0	0	0	1	0
ppa_can_300		14.3921	16.8	TTCCAAAA	2.59211	45	N/A	0	0	45	0	0	0	0	0	0	0
ppa_can_419		14.2526	17.7	TTCCACAT	1.55263	88	GAAGGTG	0	140	-52	0	0	0	0	0	0	0
ppa_can_412		14.2237	19.5	AACGATAA	-0.276316	111	N/A	0	0	111	0	0	0	0	0	0	0
ppa_can_283		14.0474	18.1	TTCCATAG	0.947368	108	ATATGCG	0	119	-11	1	0	0	0	0	0	0
ppa_can_221		13.5395	18.5	ACCCACAC	0.0394737	24	GAGTGTG	0	139	-115	0	0	0	0	0	0	0
ppa_can_369		13.4605	16	ATCCATAT	2.46053	27	GAATGTG	3.7449	51	-24	0	0	0	0	0	0	0
ppa_can_423		13.4237	17.7	AACCAACA	0.723684	127	N/A	0	0	127	0	0	0	0	0	0	0
ppa_can_176		13.3842	18.7	ACCAACAA	-0.315789	85	AAATGTA	3.45918	35	50	0	0	0	0	0	0	0
ppa_can_111		13.3237	18.6	AACGATAA	-0.276316	39	AAATTTG	3.45918	128	-89	0	0	0	0	0	0	0
ppa_can_442		13.2921	16.2	ATCCAAAA	2.09211	21	AAGTGTG	3.7449	76	-55	1	0	3	0	0	1	0
ppa_can_213		13.2158	19.9	AACAACAA	-1.68421	98	AAAAGTG	3.7449	122	-24	0	0	0	0	0	0	0
ppa_can_392		13.2026	15.4	AACCAAAT	2.80263	45	N/A	0	0	45	1	0	0	0	1	0	0
ppa_can_337		13.0921	16.5	TACCATCT	1.59211	7	N/A	0	0	7	0	0	0	0	0	0	0
ppa_can_438		13.0921	16.5	TCCAATAA	1.59211	81	AACAGTG	0	33	48	0	0	0	0	0	0	0
ppa_can_56		13.0605	15.6	ATCCATAT	2.46053	79	AAAAGAG	0	50	29	0	0	0	0	0	0	0
ppa_can_413		13.0158	19.2	TACTACAA	-1.18421	5	TAGTGTG	0	141	-136	0	0	0	0	0	0	0
ppa_can_197		13	18	AACCCTAA	0	77	AAATGCG	3.7449	137	-60	0	0	0	0	0	0	0
ppa_can_285		12.7237	18	AACAATAA	-0.276316	80	N/A	0	0	80	0	0	0	0	0	0	0
ppa_can_436		12.6921	16.6	ACCAATAA	1.09211	98	N/A	0	0	98	0	0	0	0	0	0	0
ppa_can_278		12.6605	18.7	GACCACAG	-1.03947	19	AATTGTG	3.7449	114	-95	0	0	0	0	0	0	0
ppa_can_144		12.6237	17.4	TACAATAA	0.223684	71	AAATATG	3.45918	141	-70	0	0	0	0	0	0	0
ppa_can_336		12.6237	16.9	AACCAACA	0.723684	37	AAAAGAG	0	131	-94	0	0	0	0	0	0	0
ppa_can_310		12.6237	16.4	TACCAACA	1.22368	46	N/A	0	0	46	0	0	0	0	0	0	0
ppa_can_426		12.6026	17.3	CACCATCA	0.302632	120	N/A	0	0	120	0	0	0	0	0	0	0
ppa_can_299		12.2474	15.8	ACCCATAC	1.44737	66	AAATTTG	3.45918	96	-30	0	0	0	0	0	0	0
ppa_can_376		12.1816	15.8	ACCCATGA	1.38158	13	N/A	0	0	13	0	0	0	0	0	0	0
ppa_can_295		12.1132	17.1	AACCATTA	0.0131579	106	N/A	0	0	106	0	0	0	0	0	0	0
ppa_can_343		12.0237	15.8	TACCAACA	1.22368	141	TATTGTG	0	16	125	0	0	0	0	0	0	0
ppa_can_185		11.8711	18.7	TCCCAACT	-1.82895	97	N/A	0	0	97	0	0	0	0	0	0	0
ppa_can_272		11.8605	19.4	TCCCATTT	-2.53947	102	N/A	0	0	102	0	0	0	0	0	1	0
ppa_can_233		11.7921	15.2	TCCAATAA	1.59211	39	TAATGAG	0	110	-71	0	0	0	0	0	0	0
ppa_can_178		11.7579	15.1	AGCCATAA	1.65789	82	AAATTTG	3.45918	57	25	0	0	0	0	0	0	0
ppa_can_194		11.5237	16.8	AATCATAA	-0.276316	110	TATTGTG	0	58	52	0	0	0	0	0	0	0
ppa_can_177		11.4816	19.6	CTCCAAAA	-3.11842	102	TAATGTG	3.7449	73	29	0	0	0	0	0	0	0
ppa_can_393		11.3921	15.3	ACCGATAA	1.09211	140	N/A	0	0	140	0	0	0	0	0	0	0
ppa_can_297		11.3842	16.2	TCTCACAA	0.184211	112	N/A	0	0	112	0	0	0	0	0	0	0
ppa_can_163		11.3026	16	CACCATCA	0.302632	68	ACTTGTG	0	122	-54	0	0	0	0	0	0	0
ppa_can_279		11.2237	16.5	AACAATAA	-0.276316	73	N/A	0	0	73	0	0	0	0	0	0	0
ppa_can_367		11.2237	16	TAACATAA	0.223684	124	N/A	0	0	124	0	0	0	0	0	0	0
ppa_can_411		11.1026	20.3	TACTATAT	-4.19737	114	ATATGTG	3.7449	16	98	0	0	0	0	0	0	0
ppa_can_409		11.0921	15	ACGCATAA	1.09211	49	N/A	0	0	49	0	0	0	0	0	0	0
ppa_can_372		11.0842	15.9	TCACACAA	0.184211	137	AAATGTA	3.45918	61	76	0	0	0	0	0	0	0
ppa_can_421		11.0158	17.7	AACAACAA	-1.68421	122	AGATGAG	0	54	68	0	0	0	0	0	0	0
ppa_can_335		10.9395	16.9	ATCCACAG	-0.960526	50	N/A	0	0	50	0	0	0	0	0	0	0
ppa_can_383		10.7842	15.6	TCCAACAA	0.184211	87	N/A	0	0	87	0	0	0	0	0	0	0
ppa_can_280		10.7342	20.8	AACGAAAA	-5.06579	133	N/A	0	0	133	0	0	0	0	0	0	0
ppa_can_341		10.6237	15.9	AACAATAA	-0.276316	16	N/A	0	0	16	0	0	0	0	0	0	0
ppa_can_355		10.5842	15.4	TCCAACAA	0.184211	95	N/A	0	0	95	0	1	1	1	1	0	0
ppa_can_378		10.5237	15.8	AACAATAA	-0.276316	90	AAATGTT	3.45918	7	83	0	0	0	0	0	0	0
ppa_can_301		10.5237	15.3	TACTATAA	0.223684	23	N/A	0	0	23	0	0	0	0	0	0	0
ppa_can_141		10.5237	15.3	TATCATAA	0.223684	1	CAATGAG	0	44	-43	0	0	0	0	0	0	0
ppa_can_427		10.5158	17.2	AACAACAA	-1.68421	136	GAACGTG	0	105	31	0	0	0	0	0	0	0
ppa_can_19		10.5026	18.7	TCACAAAA	-3.19737	138	N/A	0	0	138	0	0	0	0	0	0	0
ppa_can_387		10.5	15.5	AACCTTAA	0	137	AAATCTG	3.45918	84	53	0	0	0	0	0	0	0
ppa_can_408		10.3237	15.1	TAACATAA	0.223684	10	AAATGAG	3.7449	22	-12	0	0	0	0	0	0	0
ppa_can_386		10.1842	15.5	ACACACAA	-0.315789	136	N/A	0	0	136	0	0	0	0	0	0	0
ppa_can_354		10.1237	15.4	AACAATAA	-0.276316	7	AAATGTA	3.45918	1	6	0	0	0	0	0	0	0
ppa_can_200		9.99211	15.9	TACCTCAA	-0.907895	9	ACAGGTG	0	67	-58	0	0	0	0	0	0	0
ppa_can_417		9.80263	18	TCTCAAAA	-3.19737	117	AATAGTG	0	83	34	0	0	0	0	0	0	0
ppa_can_338		9.71579	16.4	AACAACAA	-1.68421	116	N/A	0	0	116	0	0	0	0	0	0	0
ppa_can_172		9.59474	20.2	TATCACAT	-5.60526	80	GAGTGTG	0	123	-43	0	0	0	0	0	0	0
ppa_can_112		9.57368	15.6	ATCCACCA	-1.02632	19	AAAAGCG	0	31	-12	0	0	0	0	0	0	0
ppa_can_250		9.57105	16.4	TTCCAAAT	-1.82895	72	TAGTGTG	0	100	-28	0	0	0	0	0	0	0
ppa_can_236		9.53684	16.8	TGCCATAT	-2.26316	7	AAATTTG	3.45918	87	-80	0	0	0	0	0	0	0
ppa_can_238		9.50263	19.2	AACTATAT	-4.69737	3	N/A	0	0	3	0	0	0	0	0	0	0
ppa_can_444		9.31579	16	AATCACAA	-1.68421	117	AAAAGTG	3.7449	0	117	0	0	0	0	0	0	0
ppa_can_247		9.20263	17.4	TCCGAAAA	-3.19737	19	N/A	0	0	19	0	0	0	0	0	0	0
ppa_can_415		9.19211	18.6	AACCATGT	-4.40789	128	CCATGTG	0	127	1	0	0	0	0	0	0	0
ppa_can_429		9.14737	17.2	ACCCTTAT	-3.05263	49	AGATGAG	0	79	-30	0	0	0	0	0	0	0
ppa_can_347		9.01579	15.7	AACAACAA	-1.68421	135	AAATGAG	3.7449	28	107	0	0	0	0	0	0	0
ppa_can_304		8.99211	15.4	AACCTCAA	-1.40789	54	ACATGGG	0	68	-14	0	0	0	0	0	0	0
ppa_can_365		8.41579	15.1	AACGACAA	-1.68421	113	N/A	0	0	113	0	0	0	0	0	0	0
ppa_can_401		8.37105	15.2	TTCCAAAT	-1.82895	28	N/A	0	0	28	0	0	0	0	0	0	0
ppa_can_287		8.36842	16	TGCCAAAA	-2.63158	36	AATTGGG	0	139	-103	0	0	0	0	0	0	0
ppa_can_275		8.25789	17.6	ATCCAAAG	-4.34211	36	TAATGAG	0	27	9	0	0	0	0	0	0	0
ppa_can_209		8.19211	15.6	CACCAAAT	-2.40789	8	AATTGTG	3.7449	88	-80	0	0	0	0	0	0	0
ppa_can_296		8.13421	18.2	AACAAAAA	-5.06579	69	N/A	0	0	69	0	0	0	0	0	0	0
ppa_can_270		8.09211	15.5	CACCAAAT	-2.40789	124	AAATTTG	3.45918	121	3	0	0	0	0	0	0	0
ppa_can_334		8.09211	17	TACCATTT	-3.90789	69	N/A	0	0	69	0	0	0	0	0	0	0
ppa_can_317		8.06316	17.8	ACCGACAT	-4.73684	92	AAATATG	3.45918	66	26	0	0	0	0	0	0	0
ppa_can_139		8.03684	15.3	TGCCATAT	-2.26316	51	CAATGAG	0	44	7	0	0	0	0	0	0	0
ppa_can_140		8.03684	15.3	TGCCATAT	-2.26316	51	CAATGAG	0	44	7	0	0	0	0	0	0	0
ppa_can_241		8.03421	18.1	AACTAAAA	-5.06579	99	N/A	0	0	99	0	0	0	0	0	0	0
ppa_can_424		7.80263	17.5	AACAATAT	-4.69737	89	AAATGTT	3.45918	53	36	0	0	0	0	0	0	0
ppa_can_319		7.78158	15.9	GTCCAAAA	-3.11842	45	AAATGGG	3.7449	86	-41	0	0	0	0	0	0	0
ppa_can_382		7.77105	15.6	TCCTATAT	-2.82895	113	N/A	0	0	113	0	0	0	0	0	0	0
ppa_can_253		7.68421	18.5	AACCACTT	-5.81579	37	AAATGTT	3.45918	18	19	0	0	0	0	0	0	0
ppa_can_252		7.68421	18.5	AACCACTT	-5.81579	35	AAATGTT	3.45918	16	19	0	0	0	0	0	0	0
ppa_can_254		7.68421	18.5	AACCACTT	-5.81579	37	AAATGTT	3.45918	18	19	0	0	0	0	0	0	0
ppa_can_290		7.68158	16.8	CACCATCT	-4.11842	120	GATTGTG	0	10	110	0	0	0	0	0	0	0
ppa_can_189		7.65	15.4	CTCCATAT	-2.75	46	TAATGAG	0	59	-13	0	0	0	0	0	0	0
ppa_can_248		7.38158	15.5	CTCCAAAA	-3.11842	131	AAATGTA	3.45918	126	5	0	0	0	0	0	0	0
ppa_can_32		7.13421	16.7	TACGAAAA	-4.56579	87	AGATGTG	3.7449	68	19	0	0	0	0	0	0	0
ppa_can_431		7.12368	16.9	AACCAATA	-4.77632	73	AAATTTG	3.45918	85	-12	0	0	0	0	0	0	0
ppa_can_422		7.09474	17.7	TACAACAT	-5.60526	130	N/A	0	0	130	0	0	0	0	0	0	0
ppa_can_291		7.09211	16.5	AACCATTT	-4.40789	103	N/A	0	0	103	0	0	0	0	0	0	0
ppa_can_246		7.03421	17.1	AAACAAAA	-5.06579	78	ATAAGTG	0	72	6	0	0	0	0	0	0	0
ppa_can_433		7.00263	16.7	AACTATAT	-4.69737	6	N/A	0	0	6	0	0	0	0	0	1	0
ppa_can_184		7	22	N/A	-10	0	AAGCGTG	0	130	-130	0	0	0	0	0	0	0
ppa_can_437		6.90263	16.6	AACTATAT	-4.69737	30	ATATGAG	0	98	-68	0	0	0	0	0	0	0
ppa_can_149		6.89211	15.8	TACCATTT	-3.90789	68	TAATGAG	0	26	42	0	0	0	0	0	0	0
ppa_can_150		6.89211	15.8	TACCATTT	-3.90789	70	TAATGAG	0	28	42	0	0	0	0	0	0	0
ppa_can_400		6.87105	15.2	ACCAATAT	-3.32895	137	N/A	0	0	137	0	0	1	0	0	0	0
ppa_can_316		6.72368	16	TACCAAGA	-4.27632	113	AAATGAG	3.7449	105	8	0	0	0	0	0	0	0
ppa_can_430		6.69211	17.1	ATCGATAA	-5.40789	33	N/A	0	0	33	0	0	0	0	0	0	0
ppa_can_349		6.69211	15.6	TACCATTT	-3.90789	83	AAATGTC	3.45918	142	-59	0	0	0	0	1	0	0
ppa_can_294		6.60263	16.3	AACTATAT	-4.69737	128	AAATTTG	3.45918	77	51	0	0	0	0	0	0	0
ppa_can_396		6.47105	15.3	CCCCATGA	-3.82895	50	N/A	0	0	50	0	0	0	0	0	0	0
ppa_can_404		6.35789	15.2	TTCCAAAG	-3.84211	55	N/A	0	0	55	0	0	0	0	0	0	0
ppa_can_384		6.30263	15.5	TATCATAT	-4.19737	126	N/A	0	0	126	0	0	0	0	0	0	0
ppa_can_264		6.28421	17.1	AACCACTT	-5.81579	37	AAATGTT	3.45918	18	19	0	0	0	0	0	0	0
ppa_can_265		6.28421	17.1	AACCACTT	-5.81579	35	AAATGTT	3.45918	16	19	0	0	0	0	0	0	0
ppa_can_362		6.25789	15.1	TTCCAAAG	-3.84211	73	N/A	0	0	73	0	0	0	0	0	0	0
ppa_can_359		6.25789	15.1	TTCCAAAG	-3.84211	71	N/A	0	0	71	0	0	0	0	0	0	0
ppa_can_361		6.25789	15.1	TTCCAAAG	-3.84211	73	N/A	0	0	73	0	0	0	0	0	0	0
ppa_can_360		6.25789	15.1	TTCCAAAG	-3.84211	71	N/A	0	0	71	0	0	0	0	0	0	0
ppa_can_363		6.25789	15.1	TTCCAAAG	-3.84211	73	N/A	0	0	73	0	0	0	0	0	0	0
ppa_can_364		6.25789	15.1	TTCCAAAG	-3.84211	73	N/A	0	0	73	0	0	0	0	0	0	0
ppa_can_377		6.23421	15.8	TATCAAAA	-4.56579	98	AAATCTG	3.45918	138	-40	0	0	0	0	0	0	0
ppa_can_381		6.21316	15.7	CACCAACA	-4.48684	120	N/A	0	0	120	0	0	0	0	0	0	0
ppa_can_371		6.18947	15.9	AACCAAAC	-4.71053	44	N/A	0	0	44	0	0	0	0	0	0	0
ppa_can_243		6.18158	15.3	GCCAATAA	-4.11842	96	AAATATG	3.45918	91	5	0	0	0	0	0	0	0
ppa_can_394		6.10263	15.3	TACTATAT	-4.19737	92	N/A	0	0	92	0	0	0	0	0	0	0
ppa_can_395		6.10263	15.3	TATCATAT	-4.19737	13	N/A	0	0	13	0	0	0	0	0	0	0
ppa_can_187		5.80263	15.5	AAACATAT	-4.69737	80	AAATGTT	3.45918	119	-39	0	0	0	0	0	0	0
ppa_can_435		5.77895	16.7	TACCATGG	-5.92105	120	N/A	0	0	120	0	0	0	0	0	0	0
ppa_can_385		5.72368	15.5	AGCCATAG	-4.77632	34	GATTGTG	0	67	-33	1	0	0	0	0	0	0
ppa_can_306		5.70263	15.4	AACTATAT	-4.69737	114	GAATGTG	3.7449	61	53	0	0	0	0	0	0	0
ppa_can_391		5.70263	15.4	AACTATAT	-4.69737	137	TAATGTG	3.7449	28	109	0	0	0	0	0	0	0
ppa_can_323		5.70263	15.4	AACTATAT	-4.69737	137	TAATGTG	3.7449	28	109	0	0	0	0	0	0	0
ppa_can_345		5.63421	15.7	AATCAAAA	-5.06579	122	ATTTGTG	0	23	99	0	0	0	0	0	0	0
ppa_can_342		5.56842	15.7	ATCCTTAA	-5.13158	37	N/A	0	0	37	0	0	0	0	0	0	0
ppa_can_353		5.49211	15.4	TTTCATAA	-4.90789	110	AAAAGTG	3.7449	3	107	0	0	0	0	0	0	0
ppa_can_109		5.41316	15.9	GACAATAA	-5.48684	25	N/A	0	0	25	0	0	0	0	0	0	0
ppa_can_268		5.3	20.3	N/A	-10	0	AAAGGAG	0	125	-125	0	0	0	0	0	0	0
ppa_can_266		5.3	20.3	N/A	-10	0	AAAGGAG	0	127	-127	0	0	0	0	0	0	0
ppa_can_267		5.3	20.3	N/A	-10	0	AAAGGAG	0	125	-125	0	0	0	0	0	0	0
ppa_can_402		5.29211	15.2	TCCAATCA	-4.90789	19	AATAGTG	0	110	-91	0	0	0	0	0	0	0
ppa_can_314		5.13421	15.2	AAACAAAA	-5.06579	86	TATTGTG	0	124	-38	0	0	0	0	0	0	0
ppa_can_407		5.03421	15.1	AACTAAAA	-5.06579	7	AAGTGAG	0	34	-27	0	0	0	0	0	0	0
ppa_can_380		4.77895	15.7	TACCATGG	-5.92105	17	AAATGAG	3.7449	114	-97	0	0	0	0	0	0	0
ppa_can_173		4.71316	15.2	GATCATAA	-5.48684	86	AAATATG	3.45918	67	19	0	0	0	0	0	0	0
ppa_can_410		4.59211	15	ATCGATAA	-5.40789	66	N/A	0	0	66	0	0	0	0	0	0	0
ppa_can_414		4.1	19.1	N/A	-10	0	AAATATG	3.45918	86	-86	0	0	0	0	0	0	0
ppa_can_418		2.8	17.8	N/A	-10	0	N/A	0	0	0	0	0	0	0	0	0	0
ppa_can_190		2.7	17.7	N/A	-10	0	AAATGTA	3.45918	48	-48	0	0	0	0	0	0	0
ppa_can_329		2.3	17.3	N/A	-10	0	N/A	0	0	0	0	0	0	0	0	0	0
ppa_can_425		2.3	17.3	N/A	-10	0	CAATGGG	0	41	-41	0	0	0	0	0	0	0
ppa_can_331		2.2	17.2	N/A	-10	0	CAATGTG	3.7449	52	-52	0	0	0	0	0	0	0
ppa_can_428		2.2	17.2	N/A	-10	0	N/A	0	0	0	0	0	0	0	0	0	0
ppa_can_332		2.1	17.1	N/A	-10	0	N/A	0	0	0	0	0	0	0	0	0	0
ppa_can_269		1.9	16.9	N/A	-10	0	N/A	0	0	0	0	0	0	0	0	0	0
ppa_can_261		1.8	16.8	N/A	-10	0	AGTTGTG	0	11	-11	0	0	0	0	0	0	0
ppa_can_308		1.6	16.6	N/A	-10	0	N/A	0	0	0	0	0	0	0	0	0	0
ppa_can_202		1.6	16.6	N/A	-10	0	N/A	0	0	0	0	0	0	0	0	0	0
ppa_can_293		1.5	16.5	N/A	-10	0	ACATGGG	0	135	-135	0	0	0	0	0	0	0
ppa_can_339		1.4	16.4	N/A	-10	0	N/A	0	0	0	0	0	0	0	0	0	0
ppa_can_439		1.4	16.4	N/A	-10	0	AATTGAG	0	7	-7	0	0	0	0	0	0	0
ppa_can_440		1.4	16.4	N/A	-10	0	AGCTGTG	0	103	-103	0	0	0	0	0	0	0
ppa_can_441		1.2	16.2	N/A	-10	0	N/A	0	0	0	0	0	0	0	0	0	0
ppa_can_340		1.1	16.1	N/A	-10	0	GAATGAG	0	32	-32	0	0	0	0	0	0	0
ppa_can_313		1	16	N/A	-10	0	N/A	0	0	0	0	0	0	0	0	0	0
ppa_can_446		1	16	N/A	-10	0	GAAAGTG	0	109	-109	0	0	0	0	0	0	0
ppa_can_445		1	16	N/A	-10	0	GAAAGTG	0	112	-112	0	0	0	0	0	0	0
ppa_can_379		0.7	15.7	N/A	-10	0	TATTGTG	0	143	-143	0	0	0	0	0	0	0
ppa_can_315		0.7	15.7	N/A	-10	0	N/A	0	0	0	0	0	0	0	0	0	0
ppa_can_346		0.7	15.7	N/A	-10	0	N/A	0	0	0	0	0	0	0	0	0	0
ppa_can_351		0.6	15.6	N/A	-10	0	N/A	0	0	0	0	0	0	0	0	0	0
ppa_can_352		0.5	15.5	N/A	-10	0	AATGGTG	0	66	-66	0	0	0	0	0	0	0
ppa_can_389		0.4	15.4	N/A	-10	0	N/A	0	0	0	1	0	0	0	0	0	0
ppa_can_390		0.4	15.4	N/A	-10	0	N/A	0	0	0	0	0	0	0	0	0	0
ppa_can_397		0.3	15.3	N/A	-10	0	AAGAGTG	0	117	-117	0	0	0	0	0	0	0
ppa_can_357		0.3	15.3	N/A	-10	0	AAAGGTG	3.7449	83	-83	0	0	0	0	0	0	0
ppa_can_398		0.2	15.2	N/A	-10	0	AATTGCG	0	137	-137	0	0	0	0	0	0	0
ppa_can_399		0.2	15.2	N/A	-10	0	GGATGTG	0	93	-93	0	0	0	0	0	0	0
ppa_can_242		0.2	15.2	N/A	-10	0	N/A	0	0	0	0	0	0	0	0	0	0
ppa_can_366		0	15	N/A	-10	0	CATTGTG	0	83	-83	0	0	0	0	0	0	0

## Sheet: A. subglobosum
		Classifier summary									Read counts	Expression validation
Class I RNA candidate	Name	classifier score	CM score	DUSE_seq	duse_score	duse_dist	TGTG-box_seq	TGTG-box_score	TGTG-box_dist	inter_dist		Read coverage	Northern blot
asu_can_1	AsuR-1	62.6605	48.2	TCCCATAT	9.46053	61	N/A	0	0	61	N/A	N/A
asu_can_3	AsuR-2	61.0816	42.2	TCCCATAA	13.8816	58	AATTGTG	3.7449	120	-62	N/A	N/A
asu_can_18	AsuR-3	60.3816	41.5	TCCCATAA	13.8816	60	N/A	0	0	60	N/A	N/A
asu_can_19	AsuR-4	55.6816	36.8	TCCCATAA	13.8816	59	GAATGTG	3.7449	86	-27	N/A	N/A
asu_can_2	AsuR-5	54.0816	35.7	ACCCATAA	13.3816	59	AAACGTG	3.7449	123	-64	N/A	N/A
asu_can_37	AsuR-6	53.9816	35.6	ACCCATAA	13.3816	59	N/A	0	0	59	N/A	N/A
asu_can_17	AsuR-7	53.4816	44.6	TCCCATAA	13.8816	53	AAATATG	3.45918	11	42	N/A	N/A
asu_can_39	AsuR-8	51.9132	34.9	AACCATAA	12.0132	59	N/A	0	0	59	N/A	N/A
asu_can_20	AsuR-9	50.5816	31.7	TCCCATAA	13.8816	59	AACAGTG	0	73	-14	N/A	N/A
asu_can_36	AsuR-10	47.1026	35.3	CACCATAA	6.80263	61	N/A	0	0	61	N/A	N/A	AsuR-10
asu_can_40	AsuR-11	46.8132	29.8	AACCATAA	12.0132	59	GAACGTG	0	107	-48	N/A	N/A
asu_can_26	AsuR-12	44.5132	27.5	AACCATAA	12.0132	59	AATTGTG	3.7449	72	-13	N/A	N/A
asu_can_5	AsuR-13	44.3816	26	ACCCATAA	13.3816	60	AAATGTG	13.5714	55	5	N/A	N/A	AsuR-13/14
asu_can_4	AsuR-14	43.0132	26	AACCATAA	12.0132	61	N/A	0	0	61	N/A	N/A	AsuR-13/14
asu_can_21	AsuR-15	40.1026	28.3	GACCATAA	6.80263	59	GAGTGTG	0	117	-58	N/A	N/A
asu_can_86	AsuR-16	36.4132	19.4	AACCATAA	12.0132	58	GAATGAG	0	133	-75	N/A	N/A
asu_can_58	AsuR-17	34.7816	16.4	ACCCATAA	13.3816	58	TATTGTG	0	47	11	N/A	N/A
asu_can_59	AsuR-18	32.9132	15.9	AACCATAA	12.0132	60	N/A	0	0	60	N/A	N/A
asu_can_133		29.1132	21.6	TACCATAA	12.5132	118	CAATGAG	0	90	28	N/A	N/A
asu_can_121		27.1816	18.3	TCCCATAA	13.8816	119	AATTGAG	0	21	98	N/A	N/A
asu_can_199		25.3921	18.8	TCACATAA	1.59211	61	N/A	0	0	61	N/A	N/A
asu_can_102		23.9816	17.1	TCCCATTA	1.88158	58	N/A	0	0	58	N/A	N/A
asu_can_42		23.9816	21.6	TCCCATCA	7.38158	82	N/A	0	0	82	N/A	N/A
asu_can_216		23.6816	16.8	TCCCATGA	1.88158	64	N/A	0	0	64	N/A	N/A
asu_can_52		23.2921	19.7	ACCCAAAA	8.59211	89	N/A	0	0	89	N/A	N/A
asu_can_123		23.1237	16.9	TACCAACA	1.22368	56	AGAGGTG	0	64	-8	N/A	N/A
asu_can_144		22.9684	17.6	CACCATAG	0.368421	60	ATAAGTG	0	44	16	N/A	N/A
asu_can_128		22.4816	20.6	ACCCATCA	6.88158	138	CAAGGTG	0	105	33	N/A	N/A
asu_can_125		22.3026	22	AACTATAT	-4.69737	61	TATTGTG	0	57	4	N/A	N/A
asu_can_45		21.8921	18.3	ACCCAAAA	8.59211	12	GTATGTG	0	133	-121	N/A	N/A
asu_can_38		21.8	36.8	N/A	-10	0	N/A	0	0	0	N/A	N/A
asu_can_218		21.7842	16.6	TCCAACAA	0.184211	58	ACAAGTG	0	25	33	N/A	N/A
asu_can_169		20.9395	20.4	ACCCACAG	5.53947	84	N/A	0	0	84	N/A	N/A
asu_can_215		20.7158	16.9	TACAACAA	-1.18421	58	AAATGTC	3.45918	46	12	N/A	N/A
asu_can_172		20.6816	18.3	TCCCATCA	7.38158	32	CAATGTG	3.7449	74	-42	N/A	N/A
asu_can_116		20.3947	20	GACCACAA	5.39474	16	AAAGGAG	0	119	-103	N/A	N/A
asu_can_191		19.6026	22.8	ACCCAGAA	1.80263	51	N/A	0	0	51	N/A	N/A
asu_can_213		19.4474	17	TCCCATAG	7.44737	34	ACAAGTG	0	59	-25	N/A	N/A
asu_can_90		19.4237	17.2	AACCAAAA	7.22368	24	N/A	0	0	24	N/A	N/A
asu_can_242		17.7816	15.4	TTCCATAA	7.38158	94	N/A	0	0	94	N/A	N/A
asu_can_192		17.4842	22.8	ACTCACAA	-0.315789	69	CAAAGTG	0	42	27	N/A	N/A
asu_can_163		17.4132	16.4	TACCATCA	6.01316	136	ATATGAG	0	45	91	N/A	N/A
asu_can_129		17.3921	21.3	ACCTATAA	1.09211	31	TAATGTG	3.7449	76	-45	N/A	N/A
asu_can_118		17.2816	15.4	ACCCATCA	6.88158	136	N/A	0	0	136	N/A	N/A
asu_can_122		17.2816	21.9	ATCCATCA	0.381579	8	N/A	0	0	8	N/A	N/A
asu_can_127		17.2237	21.5	AACCAACA	0.723684	97	AAATGAG	3.7449	122	-25	N/A	N/A
asu_can_33		17.1816	15.3	ATCCATAA	6.88158	13	AAGGGTG	0	60	-47	N/A	N/A
asu_can_219		16.8947	16.5	CACCACAA	5.39474	13	N/A	0	0	13	N/A	N/A
asu_can_150		16.7737	16.3	ATCCACAA	5.47368	49	AGAGGTG	0	103	-54	N/A	N/A
asu_can_252		16.7632	15	CCCCACAA	6.76316	29	ATTTGTG	0	76	-47	N/A	N/A
asu_can_183		16.7132	15.7	TACCATCA	6.01316	72	TATTGTG	0	61	11	N/A	N/A
asu_can_108		16.2737	15.8	ACCCACCA	5.47368	25	N/A	0	0	25	N/A	N/A
asu_can_228		15.8816	16	ATCCATTA	-5.11842	59	N/A	0	0	59	N/A	N/A
asu_can_132		15.6921	18.1	TCCCAACA	2.59211	34	N/A	0	0	34	N/A	N/A
asu_can_198		15.4684	19.1	ACCCCTAA	1.36842	29	N/A	0	0	29	N/A	N/A
asu_can_196		14.9632	19.7	CCCCACCA	0.263158	51	AAAGGTG	3.7449	137	-86	N/A	N/A
asu_can_210		14.8605	17.4	ACCCATCT	2.46053	120	N/A	0	0	120	N/A	N/A
asu_can_136		14.8342	19.4	AACCAGAA	0.434211	74	GGATGTG	0	120	-46	N/A	N/A
asu_can_203		14.7711	18.1	GTCCATAA	1.67105	54	CAATGTG	3.7449	127	-73	N/A	N/A
asu_can_170		14.5737	20.1	TTCCACCA	-0.526316	26	N/A	0	0	26	N/A	N/A
asu_can_171		14.35	18.6	TGCCACAA	0.75	109	N/A	0	0	109	N/A	N/A
asu_can_185		14.3053	15.2	AACCACCA	4.10526	90	AGATGTG	3.7449	110	-20	N/A	N/A
asu_can_205		14.0921	18	ACCAATAA	1.09211	108	ATTTGTG	0	97	11	N/A	N/A
asu_can_113		13.6132	16.6	CACCAAAA	2.01316	4	AAATGTG	13.5714	16	-12	N/A	N/A
asu_can_62		13.4132	17.9	TACCATGA	0.513158	86	TATTGTG	0	143	-57	N/A	N/A
asu_can_135		13.3921	15.8	TCCCAACA	2.59211	52	TCATGTG	0	90	-38	N/A	N/A
asu_can_202		13.3842	18.2	TCCAACAA	0.184211	78	N/A	0	0	78	N/A	N/A
asu_can_130		13.3237	18.6	AACAATAA	-0.276316	134	CAATGAG	0	50	84	N/A	N/A
asu_can_60		13.2605	15.3	TTCCATAT	2.96053	66	N/A	0	0	66	N/A	N/A
asu_can_44		13.179	22.6	AACCTTAT	-4.42105	131	N/A	0	0	131	N/A	N/A
asu_can_208		12.9632	17.7	GTCCACAA	0.263158	72	TAGTGTG	0	64	8	N/A	N/A
asu_can_201		12.6921	18.6	TACCGCAA	-0.907895	15	N/A	0	0	15	N/A	N/A
asu_can_158		12.6895	16.4	TACCAAAG	1.28947	103	GACTGTG	0	124	-21	N/A	N/A
asu_can_28		12.5632	22.3	ACACACAT	-4.73684	49	N/A	0	0	49	N/A	N/A
asu_can_189		12.0921	15	ACCCAACA	2.09211	1	AACTGAG	0	69	-68	N/A	N/A
asu_can_137		12.0842	17.4	ACACACAA	-0.315789	85	TAATGTG	3.7449	72	13	N/A	N/A
asu_can_48		11.971	18.8	TTCCAAAT	-1.82895	129	N/A	0	0	129	N/A	N/A
asu_can_245		11.8526	15.3	TCCCACCT	1.55263	108	N/A	0	0	108	N/A	N/A
asu_can_56		11.8132	16.3	TACCATTA	0.513158	54	GAATGAG	0	142	-88	N/A	N/A
asu_can_181		11.7921	15.7	ACCTATAA	1.09211	21	N/A	0	0	21	N/A	N/A
asu_can_184		11.7237	15.5	TACCAACA	1.22368	115	N/A	0	0	115	N/A	N/A
asu_can_217		11.7	16.7	AACCTTAA	0	5	N/A	0	0	5	N/A	N/A
asu_can_111		11.6921	15.1	TCCAATAA	1.59211	81	N/A	0	0	81	N/A	N/A
asu_can_240		11.5474	15.6	TTCCATAG	0.947368	67	N/A	0	0	67	N/A	N/A
asu_can_141		11.5237	16.3	TAACATAA	0.223684	49	AAGTGTG	3.7449	90	-41	N/A	N/A
asu_can_46		11.3842	16.2	TCCGACAA	0.184211	5	N/A	0	0	5	N/A	N/A
asu_can_147		11.3237	16.6	AATCATAA	-0.276316	142	AAAAGTG	3.7449	98	44	N/A	N/A
asu_can_177		11.2605	16.3	ACCCTCAA	-0.0394737	127	N/A	0	0	127	N/A	N/A
asu_can_120		11.2237	15.5	AACCAACA	0.723684	6	N/A	0	0	6	N/A	N/A
asu_can_139		11.2158	17.9	AAGCACAA	-1.68421	32	N/A	0	0	32	N/A	N/A
asu_can_134		11.2158	17.9	AACGACAA	-1.68421	112	AAAAGTG	3.7449	124	-12	N/A	N/A
asu_can_226		11.2	16.2	AACCCTAA	0	3	N/A	0	0	3	N/A	N/A
asu_can_214		11.0711	16.9	TACCACAC	-0.828947	140	CAATGTG	3.7449	42	98	N/A	N/A
asu_can_91		11.0158	17.2	TACAACAA	-1.18421	114	N/A	0	0	114	N/A	N/A
asu_can_187		10.9895	15.2	AACCAAAG	0.789474	15	N/A	0	0	15	N/A	N/A
asu_can_195		10.9789	19.9	TACCCTAT	-3.92105	38	N/A	0	0	38	N/A	N/A
asu_can_131		10.9026	20.1	TACAATAT	-4.19737	9	N/A	0	0	9	N/A	N/A
asu_can_249		10.8237	15.1	AACCAACA	0.723684	14	ACAAGTG	0	44	-30	N/A	N/A
asu_can_68		10.7132	15.2	TACCATTA	0.513158	40	N/A	0	0	40	N/A	N/A
asu_can_232		10.7132	15.7	AACCATTA	0.0131579	109	AATTGTG	3.7449	132	-23	N/A	N/A
asu_can_229		10.6842	16	AACCACCT	-0.315789	21	N/A	0	0	21	N/A	N/A
asu_can_250		10.5474	15.1	ACCCATCG	0.447368	87	N/A	0	0	87	N/A	N/A
asu_can_246		10.5026	15.2	CACCATCA	0.302632	21	AAGGGTG	0	117	-96	N/A	N/A
asu_can_87		10.4158	16.6	TACTACAA	-1.18421	13	TATTGTG	0	112	-99	N/A	N/A
asu_can_168		10.3921	20.8	ACTCATCA	-5.40789	29	AACAGTG	0	133	-104	N/A	N/A
asu_can_124		10.3842	15.7	ACTCACAA	-0.315789	54	AATGGTG	0	119	-65	N/A	N/A
asu_can_194		10.3632	20.1	ACACACAT	-4.73684	13	AAAGGTG	3.7449	100	-87	N/A	N/A
asu_can_154		10.2947	16.4	CACCACCA	-1.10526	139	CAATGCG	0	59	80	N/A	N/A
asu_can_225		10.0158	16.2	TAACACAA	-1.18421	129	N/A	0	0	129	N/A	N/A
asu_can_148		9.98158	17.1	TCCCAGAT	-2.11842	9	GAATGTG	3.7449	58	-49	N/A	N/A
asu_can_69		9.67105	16.5	TTCCAAAT	-1.82895	8	N/A	0	0	8	N/A	N/A
asu_can_234		9.66053	15.7	CACCACAG	-1.03947	97	CAATGCG	0	126	-29	N/A	N/A
asu_can_173		9.64737	17.2	TCCCTTAT	-2.55263	117	CATTGTG	0	91	26	N/A	N/A
asu_can_186		9.30526	15.2	TACCACGA	-0.894737	66	ACATGAG	0	133	-67	N/A	N/A
asu_can_149		9.19474	15.3	CACCACCA	-1.10526	87	CAATGTG	3.7449	106	-19	N/A	N/A
asu_can_161		9.19211	17.1	TCCCAATA	-2.90789	3	GAAAGTG	0	127	-124	N/A	N/A
asu_can_220		9.17105	16.5	ATCCAAAT	-2.32895	33	AAATGTT	3.45918	30	3	N/A	N/A
asu_can_211		9.10263	17.3	TCTCAAAA	-3.19737	45	AAAGGTG	3.7449	5	40	N/A	N/A
asu_can_41		9.09211	19.5	ATTCATAA	-5.40789	76	N/A	0	0	76	N/A	N/A
asu_can_197		8.87368	19.4	GCCAACAA	-5.52632	132	N/A	0	0	132	N/A	N/A
asu_can_96		8.71579	15.4	AACAACAA	-1.68421	108	ACATGTG	3.7449	141	-33	N/A	N/A
asu_can_97		8.71579	15.4	AACAACAA	-1.68421	106	ACATGTG	3.7449	139	-33	N/A	N/A
asu_can_98		8.71579	15.4	AACAACAA	-1.68421	108	ACATGTG	3.7449	141	-33	N/A	N/A
asu_can_117		8.61579	15.3	AACAACAA	-1.68421	32	N/A	0	0	32	N/A	N/A
asu_can_212		8.52895	17.2	TGCCACAT	-3.67105	102	N/A	0	0	102	N/A	N/A
asu_can_235		8.29211	15.7	GACCAAAT	-2.40789	83	AAATCTG	3.45918	80	3	N/A	N/A
asu_can_178		8.23684	16	AGCCATAT	-2.76316	9	CAATGTG	3.7449	113	-104	N/A	N/A
asu_can_43		8.13421	17.7	TATCAAAA	-4.56579	12	TAAAGTG	0	5	7	N/A	N/A
asu_can_209		8.07895	17.5	AACCCTAT	-4.42105	101	CACTGTG	0	34	67	N/A	N/A
asu_can_54		7.37105	15.7	ACCAATAT	-3.32895	127	N/A	0	0	127	N/A	N/A
asu_can_79		7.25789	16.6	ATCCAAAG	-4.34211	23	AAAGGTG	3.7449	44	-21	N/A	N/A
asu_can_190		7.17105	15	TCCAATAT	-2.82895	138	AAATGTT	3.45918	130	8	N/A	N/A
asu_can_223		7.14211	16.3	GTCCACAT	-4.15789	65	GAGTGTG	0	125	-60	N/A	N/A
asu_can_182		7.04737	15.1	ACCCCTAT	-3.05263	128	N/A	0	0	128	N/A	N/A
asu_can_193		6.9	21.9	N/A	-10	0	AAAGGTG	3.7449	0	0	N/A	N/A
asu_can_104		6.86053	15.9	ATCCATCT	-4.03947	110	N/A	0	0	110	N/A	N/A
asu_can_51		6.8	21.8	N/A	-10	0	ACTTGTG	0	59	-59	N/A	N/A
asu_can_143		6.39211	16.8	ACCAATCA	-5.40789	82	N/A	0	0	82	N/A	N/A
asu_can_230		6.31316	15.8	GACCAACA	-4.48684	80	N/A	0	0	80	N/A	N/A
asu_can_93		6.30263	16	AATCATAT	-4.69737	96	N/A	0	0	96	N/A	N/A
asu_can_126		6.3	21.3	N/A	-10	0	AGATGGG	0	111	-111	N/A	N/A
asu_can_222		6.26842	16.4	ACCCCTCA	-5.13158	4	GTATGTG	0	137	-133	N/A	N/A
asu_can_227		6.22368	16	AACCAAGA	-4.77632	27	N/A	0	0	27	N/A	N/A
asu_can_176		6.21316	16.7	CATCATAA	-5.48684	107	GTATGTG	0	134	-27	N/A	N/A
asu_can_153		6.21316	15.7	GACCAACA	-4.48684	119	GTATGTG	0	1	118	N/A	N/A
asu_can_179		6.20263	15.9	ATCCAGAA	-4.69737	38	AATAGTG	0	33	5	N/A	N/A
asu_can_142		6.16316	15.4	TCTCACAT	-4.23684	46	CAGTGTG	0	106	-60	N/A	N/A
asu_can_231		6.14737	15.7	TCCCATGG	-4.55263	68	N/A	0	0	68	N/A	N/A
asu_can_95		5.99211	15.9	TCTCATCA	-4.90789	76	GAATGTG	3.7449	1	75	N/A	N/A
asu_can_180		5.97105	15.8	CTCCATCA	-4.82895	104	N/A	0	0	104	N/A	N/A
asu_can_233		5.92368	15.7	AACCAATA	-4.77632	24	AAGTGTG	3.7449	138	-114	N/A	N/A
asu_can_248		5.35789	15.2	AGCCATCA	-4.84211	76	GAATGTG	3.7449	129	-53	N/A	N/A
asu_can_25		4.99211	15.4	ACTCATCA	-5.40789	91	N/A	0	0	91	N/A	N/A
asu_can_244		4.77368	15.3	CCGCACAA	-5.52632	91	AATGGTG	0	74	17	N/A	N/A
asu_can_140		4	19	N/A	-10	0	N/A	0	0	0	N/A	N/A
asu_can_200		3.7	18.7	N/A	-10	0	N/A	0	0	0	N/A	N/A
asu_can_204		3	18	N/A	-10	0	ATCTGTG	0	107	-107	N/A	N/A
asu_can_206		2.9	17.9	N/A	-10	0	TGATGTG	0	110	-110	N/A	N/A
asu_can_207		2.8	17.8	N/A	-10	0	TGATGTG	0	71	-71	N/A	N/A
asu_can_174		1.9	16.9	N/A	-10	0	N/A	0	0	0	N/A	N/A
asu_can_175		1.8	16.8	N/A	-10	0	GAATGTG	3.7449	27	-27	N/A	N/A
asu_can_221		1.4	16.4	N/A	-10	0	TAAAGTG	0	107	-107	N/A	N/A
asu_can_224		1.2	16.2	N/A	-10	0	GAATGTG	3.7449	47	-47	N/A	N/A
asu_can_165		0.9	15.9	N/A	-10	0	GAGTGTG	0	127	-127	N/A	N/A
asu_can_239		0.6	15.6	N/A	-10	0	N/A	0	0	0	N/A	N/A
asu_can_238		0.6	15.6	N/A	-10	0	N/A	0	0	0	N/A	N/A
asu_can_237		0.6	15.6	N/A	-10	0	N/A	0	0	0	N/A	N/A
asu_can_236		0.6	15.6	N/A	-10	0	N/A	0	0	0	N/A	N/A
asu_can_241		0.5	15.5	N/A	-10	0	ACATGTG	3.7449	21	-21	N/A	N/A
asu_can_243		0.4	15.4	N/A	-10	0	N/A	0	0	0	N/A	N/A
asu_can_101		0.2	15.2	N/A	-10	0	TAATGGG	0	94	-94	N/A	N/A
asu_can_247		0.2	15.2	N/A	-10	0	N/A	0	0	0	N/A	N/A
asu_can_251		0.1	15.1	N/A	-10	0	ATAGGTG	0	0	0	N/A	N/A
asu_can_254		0	15	N/A	-10	0	CAGTGTG	0	3	-3	N/A	N/A
asu_can_253		0	15	N/A	-10	0	N/A	0	0	0	N/A	N/A

## Sheet: D. fasciculatum
		Classifier summary									Read counts						Expression validation
Class I RNA candidate	Name	classifier score	CM score	DUSE_seq	duse_score	duse_dist	TGTG-box_seq	TGTG-box_score	TGTG-box_dist	inter_dist	Dfa_0h_A	Dfa_0h_B	Dfa_14h_A	Dfa_14h_B	Dfa_8h_A	Dfa_8h_B	Read coverage	Northern blot
dfa_can_62	DfaR-1	48.4816	30.1	ACCCATAA	13.3816	63	AAATGTT	3.45918	80	-17	40	30	71	55	72	57	1
dfa_can_113	DfaR-2	47.9816	29.1	TCCCATAA	13.8816	61	N/A	0	0	61	208	169	204	170	313	203	1
dfa_can_1	DfaR-3	47.1816	28.3	TCCCATAA	13.8816	61	ACAGGTG	0	33	28	112	105	80	74	193	135	1
dfa_can_77	DfaR-4	46.9816	28.1	TCCCATAA	13.8816	64	AAATTTG	3.45918	53	11	17445	15911	12701	11999	17746	13165	1	DfaR-4
dfa_can_76	DfaR-5	46.0816	27.7	ACCCATAA	13.3816	63	AAATTTG	3.45918	104	-41	26643	27682	26259	25406	66432	37778	1
dfa_can_103	DfaR-6	42.7816	24.4	ACCCATAA	13.3816	62	AATAGTG	0	37	25	302	266	317	203	499	418	1
dfa_can_78	DfaR-7	42.5816	24.2	ACCCATAA	13.3816	62	N/A	0	0	62	19	10	33	26	49	47	1
dfa_can_57	DfaR-8	42.3816	24	ACCCATAA	13.3816	62	N/A	0	0	62	9	22	14	13	58	34	1
dfa_can_102	DfaR-9	42.0816	23.7	ACCCATAA	13.3816	61	AAATGTA	3.45918	27	34	112	131	160	139	383	270	1
dfa_can_80	DfaR-10	41.9816	23.6	ACCCATAA	13.3816	59	N/A	0	0	59	68	66	68	69	281	218	1
dfa_can_81	DfaR-11	41.5816	32.7	TCCCATAA	13.8816	19	ATATGTG	3.7449	55	-36	0	0	0	0	0	0	0
dfa_can_79	DfaR-12	40.4816	22.1	ACCCATAA	13.3816	60	N/A	0	0	60	11	15	25	18	24	24	1
dfa_can_84	DfaR-13	38.6816	20.3	ACCCATAA	13.3816	61	AAATATG	3.45918	107	-46	4948	4517	3703	3252	6533	4329	1
dfa_can_171	DfaR-14	37.5816	18.7	TCCCATAA	13.8816	62	AATTGTG	3.7449	38	24	52	64	43	25	58	50	1
dfa_can_88	DfaR-15	37.4816	18.6	TCCCATAA	13.8816	62	AATTGGG	0	127	-65	37	31	28	24	65	62	1
dfa_can_86	DfaR-16	36.3816	17.5	TCCCATAA	13.8816	63	AAATTTG	3.45918	99	-36	725	605	466	453	998	594	1
dfa_can_114	DfaR-17	36.3816	17.5	TCCCATAA	13.8816	60	ATATGTG	3.7449	43	17	22	12	92	84	256	140	1
dfa_can_115	DfaR-18	35.3816	17	ACCCATAA	13.3816	61	N/A	0	0	61	634	610	260	239	707	416	1
dfa_can_140	DfaR-19	34.0816	15.2	TCCCATAA	13.8816	60	N/A	0	0	60	138	100	197	196	427	304	1
dfa_can_132		29.7737	19.3	ATCCACAA	5.47368	58	AAATATG	3.45918	89	-31	1	0	0	0	0	1	0
dfa_can_222		29.6711	16.5	GCCCATAA	8.17105	64	N/A	0	0	64	0	0	1	0	2	0	0
dfa_can_118		27.4237	21.2	TACCAACA	1.22368	60	N/A	0	0	60	0	0	0	0	0	0	0
dfa_can_251		25.7921	23.2	AACCATAT	7.59211	76	N/A	0	0	76	7	6	15	7	8	7	0
dfa_can_173		25.4947	15.1	CACCACAA	5.39474	68	AAAAGTG	3.7449	11	57	0	0	0	0	0	0	0
dfa_can_254		21.9474	19.5	TCCCTTAT	-2.55263	62	N/A	0	0	62	0	0	0	0	0	0	0
dfa_can_46		21.8921	18.3	ACCCAAAA	8.59211	17	AAATGTG	13.5714	140	-123	0	0	0	0	0	0	0
dfa_can_310		20.8342	15.4	AACCAGAA	0.434211	60	ACAAGTG	0	18	42	5	8	11	5	11	5	0
dfa_can_123		20.6921	17.1	ACCCAAAA	8.59211	96	N/A	0	0	96	0	0	0	0	0	0	0
dfa_can_172		19.771	16.6	TTCCAAAT	-1.82895	61	N/A	0	0	61	0	1	1	0	1	1	0
dfa_can_335		19.7526	16.7	TCCCACAT	8.05263	53	N/A	0	0	53	1	0	0	1	2	3	0
dfa_can_139		19.571	16.4	GCCCATAA	8.17105	117	CTATGTG	0	124	-7	1	0	0	0	0	0	0
dfa_can_334		18.7816	16.9	ATCCATAA	6.88158	71	N/A	0	0	71	0	1	0	1	0	0	0
dfa_can_299		18.6237	16.4	AACCAAAA	7.22368	29	AGAGGTG	0	127	-98	0	0	0	0	0	0	0
dfa_can_297		18.5816	16.7	ATCCATAA	6.88158	36	ATTTGTG	0	65	-29	0	0	0	0	0	0	0
dfa_can_119		18.2237	16	AACCAAAA	7.22368	80	TAAGGTG	0	92	-12	0	0	0	0	0	0	0
dfa_can_321		18.0921	15	TACCATAT	8.09211	31	N/A	0	0	31	0	0	0	0	0	0	0
dfa_can_188		17.7053	18.6	AACCACCA	4.10526	111	N/A	0	0	111	0	0	0	0	0	0	0
dfa_can_357		17.5237	15.3	AACCAAAA	7.22368	108	GAAAGTG	0	135	-27	93	77	59	45	70	66	0
dfa_can_267		17.5026	19.2	TACCAAAT	3.30263	121	CAATGTG	3.7449	56	65	0	0	0	0	0	0	0
dfa_can_240		17.3816	15.5	ACCCATCA	6.88158	88	N/A	0	0	88	0	0	0	0	0	0	0
dfa_can_342		16.9237	16.2	TACCAATA	-4.27632	60	N/A	0	0	60	0	0	0	0	0	0	0
dfa_can_268		16.7395	15.7	TCCCACAG	6.03947	40	AATGGTG	0	54	-14	9	7	5	3	5	3	0
dfa_can_227		16.6842	15	TACCACAT	6.68421	86	AAATGTT	3.45918	16	70	0	0	0	0	0	1	0
dfa_can_125		16.6605	19.2	ACCCATCT	2.46053	88	N/A	0	0	88	0	3	1	1	0	1	0
dfa_can_345		16.6132	16.1	AACCATCA	5.51316	81	AAATATG	3.45918	64	17	0	0	0	1	2	0	0
dfa_can_259		16.3921	19.3	ATCCAAAA	2.09211	29	N/A	0	0	29	0	0	0	0	0	0	0
dfa_can_351		16.0737	15.6	ATCCACAA	5.47368	33	N/A	0	0	33	0	0	0	0	0	0	0
dfa_can_349		16.0237	15.8	AGCCATAG	-4.77632	59	AAATTTG	3.45918	102	-43	0	0	0	0	0	0	0
dfa_can_130		15.8053	21.7	TACCACGA	-0.894737	66	AAAAGAG	0	129	-63	0	0	0	0	0	0	0
dfa_can_253		15.6921	19.6	AACCATCT	1.09211	15	AAAGGTG	3.7449	107	-92	0	0	0	0	0	0	0
dfa_can_323		15.6895	19.4	TACCAAAG	1.28947	84	AAAGGAG	0	57	27	1	0	0	0	1	0	0
dfa_can_126		15.5158	22.2	AATCACAA	-1.68421	52	N/A	0	0	52	11	7	12	5	11	10	0
dfa_can_325		15.3921	18.8	TCCGATAA	1.59211	75	AAAAGTG	3.7449	141	-66	0	0	1	0	1	1	0
dfa_can_199		15.3158	22	AACAACAA	-1.68421	14	N/A	0	0	14	0	1	0	0	1	0	0
dfa_can_255		15.1921	19.1	ACCGATAA	1.09211	126	GAATGGG	0	111	15	9	6	8	7	4	6	0
dfa_can_324		14.8895	19.1	AACCAAAG	0.789474	10	N/A	0	0	10	0	0	0	1	0	0	0
dfa_can_214		14.8053	15.2	TACCACCA	4.60526	47	N/A	0	0	47	2	1	6	0	6	1	0
dfa_can_336		14.8026	16.5	TACCAAAT	3.30263	84	N/A	0	0	84	0	0	0	0	0	0	0
dfa_can_169		14.6921	17.6	ATCCAAAA	2.09211	88	N/A	0	0	88	1	0	0	0	0	1	0
dfa_can_136		14.5158	20.7	TAACACAA	-1.18421	31	N/A	0	0	31	4	3	7	4	2	2	0
dfa_can_250		14.4579	23.3	CCCCTTAA	-3.84211	12	N/A	0	0	12	0	0	0	0	0	0	0
dfa_can_263		14.1921	17.1	ACCCAACA	2.09211	117	AAATGTT	3.45918	43	74	1	0	0	0	1	0	0
dfa_can_311		14.05	15.3	GCCCATAT	3.75	36	CACTGTG	0	92	-56	0	0	0	0	0	0	0
dfa_can_252		14.0053	19.9	TACCACGA	-0.894737	33	N/A	0	0	33	0	1	1	0	0	0	0
dfa_can_326		13.9816	18.6	ATCCATCA	0.381579	92	N/A	0	0	92	4	3	3	3	1	1	0
dfa_can_314		13.5026	15.2	TACCAAAT	3.30263	111	CAAGGTG	0	72	39	1	0	0	3	2	1	0
dfa_can_298		13.4132	16.4	CACCAAAA	2.01316	14	N/A	0	0	14	0	0	0	0	0	0	0
dfa_can_205		13.3842	18.7	ACGCACAA	-0.315789	112	AAAGGTG	3.7449	36	76	0	0	0	0	0	0	0
dfa_can_327		13.3842	18.2	TCCAACAA	0.184211	82	N/A	0	0	82	0	2	1	0	1	0	0
dfa_can_368		13.1605	15.2	TCCCATCT	2.96053	89	AAATGTA	3.45918	4	85	0	0	0	0	0	0	0
dfa_can_296		13.0921	17	ACCAATAA	1.09211	36	N/A	0	0	36	0	0	0	0	0	0	0
dfa_can_275		12.8947	19	CACCACCA	-1.10526	4	AGATGTG	3.7449	80	-76	0	4	6	0	0	1	0
dfa_can_209		12.8816	16	TCCCATGA	1.88158	122	N/A	0	0	122	1	2	0	0	1	1	0
dfa_can_260		12.7026	17.4	GACCATCA	0.302632	116	N/A	0	0	116	2	0	2	1	1	3	0
dfa_can_346		12.671	16	CCCCATCA	1.67105	4	N/A	0	0	4	0	0	0	0	0	0	0
dfa_can_243		12.5237	17.3	TATCATAA	0.223684	55	N/A	0	0	55	2	2	1	0	1	0	0
dfa_can_273		12.5237	16.8	AACCAACA	0.723684	15	AATTGTG	3.7449	121	-106	0	1	3	0	3	0	0
dfa_can_148		12.4921	15.4	ACCCAACA	2.09211	94	N/A	0	0	94	0	0	0	0	1	0	0
dfa_can_176		12.3921	15.3	ATCCAAAA	2.09211	25	AAGTGTG	3.7449	70	-45	0	0	0	0	0	0	0
dfa_can_233		12.3237	17.1	TACTATAA	0.223684	122	N/A	0	0	122	0	0	0	0	0	0	0
dfa_can_316		12.1921	15.1	ATCCAAAA	2.09211	44	N/A	0	0	44	2	0	1	0	0	2	0
dfa_can_203		12.1237	17.4	AACAATAA	-0.276316	20	N/A	0	0	20	0	0	0	0	1	0	0
dfa_can_179		12.0158	18.2	TACAACAA	-1.18421	52	AACTGTG	3.7449	117	-65	0	0	2	1	0	0	0
dfa_can_355		11.9921	15.4	TCACATAA	1.59211	0	N/A	0	0	0	9	7	19	7	15	10	0
dfa_can_308		11.9684	15.6	ACCCCTAA	1.36842	104	N/A	0	0	104	0	0	0	0	0	0	0
dfa_can_162		11.9158	18.1	TACAACAA	-1.18421	94	N/A	0	0	94	0	1	1	0	0	2	0
dfa_can_143		11.6237	15.9	AACCAACA	0.723684	112	AATGGTG	0	90	22	2	0	1	0	1	3	0
dfa_can_99		11.5921	21.5	TCACATCA	-4.90789	142	AATAGTG	0	14	128	0	0	2	0	0	1	0
dfa_can_300		11.4842	16.3	TCCAACAA	0.184211	142	CAATGCG	0	74	68	0	0	0	0	0	0	0
dfa_can_333		11.4789	16.9	TACCATCG	-0.421053	22	N/A	0	0	22	0	0	0	0	0	0	0
dfa_can_121		11.4026	20.6	TATCATAT	-4.19737	54	AATGGTG	0	10	44	0	0	0	0	2	1	0
dfa_can_284		11.3921	15.3	ACCAATAA	1.09211	46	N/A	0	0	46	0	0	0	0	0	0	0
dfa_can_271		11.3842	16.7	ACACACAA	-0.315789	43	N/A	0	0	43	0	2	0	0	0	0	0
dfa_can_204		11.3605	15.9	TCCCCCAA	0.460526	97	CAATGTG	3.7449	12	85	0	0	0	0	0	0	0
dfa_can_339		11.3132	16.3	AACCATTA	0.0131579	1	N/A	0	0	1	2	2	1	0	1	1	0
dfa_can_340		11.3132	16.3	AACCATTA	0.0131579	1	N/A	0	0	1	0	1	0	0	0	0	0
dfa_can_337		11.2237	16.5	AACAATAA	-0.276316	89	N/A	0	0	89	0	0	0	0	0	0	0
dfa_can_71		11.2026	15.9	CACCATCA	0.302632	5	N/A	0	0	5	0	0	0	0	0	0	0
dfa_can_149		11.1737	16.7	TTCCACCA	-0.526316	92	N/A	0	0	92	3	3	7	5	9	4	0
dfa_can_152		11.1737	16.7	TTCCACCA	-0.526316	92	N/A	0	0	92	4	4	9	5	6	5	0
dfa_can_153		11.1737	16.7	TTCCACCA	-0.526316	94	N/A	0	0	94	1	1	1	3	0	1	0
dfa_can_154		11.1737	16.7	TTCCACCA	-0.526316	94	N/A	0	0	94	1	0	0	1	2	0	0
dfa_can_150		11.1737	16.7	TTCCACCA	-0.526316	94	N/A	0	0	94	0	2	0	1	1	0	0
dfa_can_151		11.1737	16.7	TTCCACCA	-0.526316	94	N/A	0	0	94	4	0	0	0	3	2	0
dfa_can_358		11.0895	15.3	AACCAAAG	0.789474	78	N/A	0	0	78	3	2	1	3	0	0	0
dfa_can_338		11.0237	16.3	AACAATAA	-0.276316	133	N/A	0	0	133	0	0	0	0	0	0	0
dfa_can_201		11.0158	17.7	AACGACAA	-1.68421	19	CCATGTG	0	136	-117	0	0	0	2	0	0	0
dfa_can_217		10.9842	16.3	ACACACAA	-0.315789	113	N/A	0	0	113	0	0	0	0	0	0	0
dfa_can_367		10.9237	15.2	AACCAACA	0.723684	100	TTATGTG	0	18	82	0	0	0	0	0	0	0
dfa_can_208		10.9158	17.6	AACAACAA	-1.68421	49	AAATATG	3.45918	40	9	2	0	0	1	0	0	0
dfa_can_331		10.8947	17	GACCACCA	-1.10526	94	AAAGGTG	3.7449	17	77	0	0	0	0	0	0	0
dfa_can_257		10.8711	20.7	CTCCATCA	-4.82895	11	CAATGTG	3.7449	48	-37	0	0	0	0	0	0	0
dfa_can_354		10.7026	15.4	CACCATCA	0.302632	12	AAATTTG	3.45918	87	-75	0	0	0	1	1	0	0
dfa_can_165		10.6842	15.5	TACCACCT	0.184211	109	AAATGAG	3.7449	128	-19	0	0	0	0	0	0	0
dfa_can_347		10.5237	15.8	AAACATAA	-0.276316	97	TAACGTG	0	93	4	0	0	0	0	0	0	0
dfa_can_370		10.5026	15.2	CACCATCA	0.302632	131	AAATCTG	3.45918	143	-12	15	18	26	13	11	11	0
dfa_can_248		10.3842	15.7	ACCAACAA	-0.315789	114	N/A	0	0	114	0	0	0	0	0	0	0
dfa_can_317		10.1842	15	TCACACAA	0.184211	92	N/A	0	0	92	4	0	0	0	5	0	0
dfa_can_158		10.1158	16.3	TACAACAA	-1.18421	76	AACAGTG	0	67	9	0	0	0	0	0	0	0
dfa_can_120		10.0026	19.2	TACAATAT	-4.19737	12	CAATGAG	0	85	-73	0	0	0	0	0	0	0
dfa_can_363		9.92368	15.2	AACAATAA	-0.276316	76	N/A	0	0	76	0	2	2	1	0	1	0
dfa_can_290		9.87105	17.2	ATCCAAAT	-2.32895	11	AAATGTT	3.45918	85	-74	1	1	1	1	0	0	0
dfa_can_344		9.77105	16.1	AACCACAC	-1.32895	78	N/A	0	0	78	0	0	0	0	1	0	0
dfa_can_215		9.73947	15.2	TCCCACCG	-0.460526	45	N/A	0	0	45	11	15	13	8	22	8	0
dfa_can_138		9.63421	19.7	AACTAAAA	-5.06579	89	AAATATG	3.45918	143	-54	0	0	0	0	0	0	0
dfa_can_341		9.61579	16.3	AACAACAA	-1.68421	104	N/A	0	0	104	0	0	0	2	2	0	0
dfa_can_100		9.56053	17.1	TCCCATTT	-2.53947	130	GACTGTG	0	100	30	0	1	0	0	0	0	0
dfa_can_328		9.46053	18	TTCCATCT	-3.53947	126	AAATCTG	3.45918	25	101	0	0	0	1	2	0	0
dfa_can_343		9.41579	16.1	AACAACAA	-1.68421	116	GATTGTG	0	79	37	0	0	1	0	0	1	0
dfa_can_129		9.20263	17.4	TCGCAAAA	-3.19737	52	N/A	0	0	52	3	5	3	2	2	3	0
dfa_can_348		9.11579	15.8	AACAACAA	-1.68421	107	GAGTGTG	0	38	69	3	0	2	1	0	1	0
dfa_can_366		9.01579	15.2	TACAACAA	-1.18421	13	N/A	0	0	13	2	1	3	0	3	4	0
dfa_can_365		9.01579	15.2	TACAACAA	-1.18421	11	AAAGGAG	0	6	5	0	1	0	0	0	1	0
dfa_can_318		8.91579	15.1	TACAACAA	-1.18421	128	AAAGGGG	0	123	5	0	1	0	0	0	0	0
dfa_can_137		8.91579	15.1	TATCACAA	-1.18421	124	AACTGTG	3.7449	76	48	0	0	0	0	0	0	0
dfa_can_362		8.61579	15.3	AATCACAA	-1.68421	108	AACTGGG	0	103	5	0	0	0	0	0	0	0
dfa_can_361		8.61579	15.3	AACAACAA	-1.68421	142	AATGGTG	0	54	88	1	2	3	2	2	1	0
dfa_can_117		8.60263	17.8	TACGATAT	-4.19737	25	AACTGTG	3.7449	0	25	0	0	0	0	0	0	0
dfa_can_292		8.59211	18.5	TTCAATAA	-4.90789	7	AATTGCG	0	125	-118	4	7	2	3	2	2	0
dfa_can_319		8.41579	15.1	AACAACAA	-1.68421	140	ACAAGTG	0	137	3	0	1	1	3	0	2	0
dfa_can_269		8.25	16	CTCCATAT	-2.75	78	N/A	0	0	78	0	0	0	0	0	0	0
dfa_can_67		8.20263	16.4	TCTCAAAA	-3.19737	43	N/A	0	0	43	0	1	0	0	0	0	0
dfa_can_322		8.1	23.1	N/A	-10	0	N/A	0	0	0	7	11	1	2	4	5	0
dfa_can_353		8.07105	15.4	ATCCAAAT	-2.32895	8	GATTGTG	0	48	-40	1	1	2	2	2	0	0
dfa_can_330		8.00263	17.7	AATCATAT	-4.69737	124	TGATGTG	0	118	6	0	0	0	0	0	0	0
dfa_can_329		7.93421	18	AAACAAAA	-5.06579	25	N/A	0	0	25	7	7	21	8	7	10	0
dfa_can_195		7.69211	17.6	TTACATAA	-4.90789	108	CAAGGTG	0	85	23	2	2	0	3	0	0	0
dfa_can_180		7.64737	15.7	ACCCTTAT	-3.05263	135	TGATGTG	0	65	70	0	0	0	0	0	0	0
dfa_can_202		7.63421	17.7	AAACAAAA	-5.06579	73	N/A	0	0	73	0	0	0	0	0	0	0
dfa_can_369		7.45	15.2	CTCCATAT	-2.75	70	CAATGTG	3.7449	137	-67	0	0	0	0	0	0	0
dfa_can_295		7.43421	17.5	AACTAAAA	-5.06579	94	CAATGTG	3.7449	43	51	0	0	0	0	0	0	0
dfa_can_350		7.11316	15.6	TACCAGAT	-3.48684	118	N/A	0	0	118	0	0	1	1	0	0	0
dfa_can_258		6.83421	16.4	TACTAAAA	-4.56579	14	N/A	0	0	14	0	0	0	1	0	0	0
dfa_can_218		6.79211	17.2	ACCGATCA	-5.40789	95	AAAGGAG	0	85	10	11	7	7	3	8	7	0
dfa_can_229		6.75789	16.1	ATCCAAAG	-4.34211	103	N/A	0	0	103	0	0	0	0	0	0	0
dfa_can_303		6.62368	15.9	TACCAAGA	-4.27632	32	AAATATG	3.45918	53	-21	0	0	0	0	1	0	0
dfa_can_315		6.50263	15.2	ACTCAAAA	-3.69737	32	AAAGGTG	3.7449	129	-97	1	3	3	4	2	2	0
dfa_can_277		6.30263	15.5	TATCATAT	-4.19737	124	CAAAGTG	0	80	44	3	4	4	2	3	0	0
dfa_can_124		6.30263	16	AAACATAT	-4.69737	126	AAATGTA	3.45918	80	46	0	0	0	0	0	0	0
dfa_can_265		6.29211	16.7	ATTCATAA	-5.40789	49	N/A	0	0	49	0	0	0	0	0	0	0
dfa_can_281		6.23421	16.3	AACAAAAA	-5.06579	29	N/A	0	0	29	3	0	1	1	1	1	0
dfa_can_359		6.08947	15.3	TACCAAAC	-4.21053	142	N/A	0	0	142	3	0	1	1	0	0	0
dfa_can_309		6.02368	15.3	TACCAAGA	-4.27632	140	AAATATG	3.45918	27	113	0	2	1	2	1	1	0
dfa_can_364		6.00263	15.2	TACAATAT	-4.19737	7	GAATGAG	0	36	-29	0	0	0	0	1	0	0
dfa_can_352		5.80263	15.5	AATCATAT	-4.69737	16	ATATGAG	0	58	-42	1	0	0	0	0	0	0
dfa_can_301		5.79211	16.2	ATCAATAA	-5.40789	135	N/A	0	0	135	0	0	0	0	0	1	0
dfa_can_307		5.79211	15.7	TTCTATAA	-4.90789	36	N/A	0	0	36	0	0	0	0	0	0	0
dfa_can_320		5.54737	15.1	TTCCATAC	-4.55263	13	AAGTGTG	3.7449	143	-130	0	0	0	0	0	0	0
dfa_can_272		5.47105	15.8	TACCTCAT	-5.32895	138	AAATGTC	3.45918	129	9	1	0	1	2	0	2	0
dfa_can_371		5.46316	15.2	ACACACAT	-4.73684	53	N/A	0	0	53	1	1	1	0	0	2	0
dfa_can_283		5.43421	15.5	AATCAAAA	-5.06579	50	N/A	0	0	50	0	0	0	0	0	0	0
dfa_can_373		5.33684	15.1	CTCCATAG	-4.76316	3	GAATGCG	0	140	-137	2	2	2	1	0	0	0
dfa_can_237		5.22368	15	AACCAAGA	-4.77632	89	N/A	0	0	89	0	0	0	1	0	0	0
dfa_can_372		4.79211	15.2	ATCTATAA	-5.40789	7	N/A	0	0	7	0	0	0	0	0	0	0
dfa_can_7		4.51316	15	GACTATAA	-5.48684	19	GAAGGTG	0	45	-26	0	0	0	0	0	0	0
dfa_can_128		4.3	19.3	N/A	-10	0	AAATGAG	3.7449	122	-122	0	0	0	0	0	1	0
dfa_can_178		4.2	19.2	N/A	-10	0	AAATTTG	3.45918	88	-88	0	1	0	0	1	0	0
dfa_can_261		3.4	18.4	N/A	-10	0	N/A	0	0	0	1	0	1	0	0	0	0
dfa_can_256		3.2	18.2	N/A	-10	0	TAATGAG	0	131	-131	3	1	6	3	3	2	0
dfa_can_213		3.1	18.1	N/A	-10	0	AATTGGG	0	92	-92	0	0	0	0	0	0	0
dfa_can_293		3	18	N/A	-10	0	AAATGTG	13.5714	61	-61	0	0	0	0	0	1	0
dfa_can_82		2.5	17.5	N/A	-10	0	TAGTGTG	0	128	-128	0	1	0	1	0	0	0
dfa_can_294		2.5	17.5	N/A	-10	0	AAAGGAG	0	55	-55	0	0	0	0	0	0	0
dfa_can_282		2.1	17.1	N/A	-10	0	AAAAGAG	0	3	-3	1	0	0	0	0	1	0
dfa_can_332		1.9	16.9	N/A	-10	0	ATATGGG	0	79	-79	0	0	0	0	0	0	0
dfa_can_198		1.7	16.7	N/A	-10	0	N/A	0	0	0	1	0	1	0	0	0	0
dfa_can_157		1.3	16.3	N/A	-10	0	AACAGTG	0	67	-67	0	0	0	0	0	0	0
dfa_can_228		1.2	16.2	N/A	-10	0	N/A	0	0	0	0	0	0	0	0	0	0
dfa_can_289		1	16	N/A	-10	0	N/A	0	0	0	0	0	0	0	0	0	0
dfa_can_302		1	16	N/A	-10	0	GAACGTG	0	111	-111	0	1	0	1	0	1	0
dfa_can_305		0.9	15.9	N/A	-10	0	AACGGTG	0	20	-20	1	0	0	0	0	1	0
dfa_can_304		0.9	15.9	N/A	-10	0	AAAGGAG	0	39	-39	0	0	0	0	0	0	0
dfa_can_210		0.8	15.8	N/A	-10	0	GAATGAG	0	20	-20	0	0	0	0	0	0	0
dfa_can_287		0.7	15.7	N/A	-10	0	AAATGGG	3.7449	46	-46	0	0	0	0	0	0	0
dfa_can_164		0.5	15.5	N/A	-10	0	AAAGGAG	0	122	-122	0	0	0	0	0	0	0
dfa_can_276		0.3	15.3	N/A	-10	0	TAATGAG	0	135	-135	0	0	0	0	0	0	0
dfa_can_313		0.3	15.3	N/A	-10	0	AAACGAG	0	134	-134	2	5	3	6	4	2	0
dfa_can_360		0.3	15.3	N/A	-10	0	GATTGTG	0	28	-28	3	2	3	1	3	4	0
dfa_can_356		0.3	15.3	N/A	-10	0	N/A	0	0	0	0	0	0	0	0	0	0
dfa_can_108		0.2	15.2	N/A	-10	0	TAATGTG	3.7449	91	-91	0	0	0	1	0	0	0
dfa_can_225		0.2	15.2	N/A	-10	0	N/A	0	0	0	0	0	0	0	0	0	0
