# Supplementary material for: Abundantly expressed class of noncoding RNAs conserved through the multicellular evolution of dictyostelid social amoebas
Source: Genome Res. 2021 Mar;31(3):436–47. doi: 10.1101/gr.272856.120 (PMC7919456; doi:10.1101/gr.272856.120)
Supplement: Supplemental Material [file supp_gr.272856.120_Supplementary_Table_S5.xlsx]

## Sheet: Info
Supplemental Table S5. Potential CIBP orthologues in outgroup genome sequences.
All potential CIBP orthologues identified in outgroup genome sequences. Protein identifier, length and sequence is given for each orthologue. "N/A" indicates that no orthologue was found.

## Sheet: CIBP orthologues
Organism	NCBI protein identifier	Length (AA)	Sequence
P. fungivorum	PRP73562.1	324	MVRTKVFVGNLSFKTREPELSQHFESVAKVVGVNIITRGPRSLGYGFVELETEEDAKKAVAAMDKKEIDGRPINVDIAKARPEGQGETKPAGTEGAEGSPRTTQPRAPSNRRGGATRGRGGAKAANATPASPSTAPASGDANASPAPEGAKRPRTRKPRAPKKEGEGATEGQTPEAKPKRERAPRPPKAESAPKAERPPRDPQNDTRIPSETSLFVANLPFSLTNESFGKILTDSGLKYKKAHVVVKRNQKSKGFGFVEFDNQEEQKKALDALTGKKIEDRELAPKVALVSDPKAPAETKAQSPAVAASPAAAAASPAVETKTA
P. fungivorum	PRP81022.1	203	MSEHKLAPSRSTVYVSNLDYDFTNNDVIQLFEPYGKVTKVTIMRDKETRKSRGVAFVLFLTAEDAAHAITAMNGKEVNGFTLKCSIAKDNNRASEFIKRRKYGESRCFECGEMDHVSYNCPKNILGDREKPQKKVKPKKARGEKKEEGSDEDRVEYRDEDFDDYRSIEPPTNEIVSRYDQPNPHKRKIEKDSYFSDEENETKR
P. fungivorum	PRP81720.1	120	MLSRASSSLRFAAQASAPLARAPLSRSFASKSLYVGNLPWNVSENELKSAINEFVPVQAVKIPLDRETGRPRGFAFVDLGSEEEAEKVIAEFHGKSFGGRILRVNEKESRPFTDRPPRSQ
P. fungivorum	PRP84684.1	308	MASHRSAKSVFVGNIPYEATEQQLMEVFEEVGRVVGFRLVYDKETGKPQGYGFCEFMDAETALCAMRNLNNREFHGRNLRVDFAEKEKQQNAALQKAKAAAPRPAPISNMTSAPNTAQTVNTVVESMSSFGVYNLVAQMKMLVQQNPDQARSILNEKPQLAYALLRSQAILGMINAQTVQKLVTPVAQQPPMNMTSNPPIIPGVNPMNPTPHMPVPPGNMNMMMGGMPNPGYPPAGPVLYNGGNTSYPPQPHNFTPAPFNAPPLIDQQQQQLIQTVMAMSQEQIDALPLEQRTAVQAIKQHLAGNRFQ
P. fungivorum	PRP84973.1	492	MVCITDSLSTVLRYLLPQYLPMITYTSPHELSSSSFLLILSFRTFKKGKREDCDISDPFAFSIFHYLTSNLVNNLSLTQGHYELSPNTSPADVTTDLINMAAGKKVEKKQKKVVEAEPEEEVSPMEEEEKPKKADKKTPAKKSKKADSDEEEEEKPAPKKGKKEEKTPAKKAKKADSDDEEEEKPAPKKGKKEEKTPAKKSKPAKEESDDEEEEEEKPAPKKASKKAAKEESEEEAEEEEEDEMKVSSAANGASKSSDEDANKVYLKNLSYEVTEEDLTEFFSEVGTPEINLEKGYGNAVFASAEEAAEALNLSGTELKGRKVFIQTTDTKFVKDAVAPSKYSVFIGNLCRDNANEDEIRELFSDCGEIIGCRLLTDRETGAMKGCAFLDFATKEEAEK…
P. fungivorum	PRP86618.1	393	MAKQEAKKQQKRKKDDVENEAEIENGRAEEHVVEKKSKKVKTETTGQKKEKEQKNEEEPKTKKQKKEKDEVKEVSQEETVKTPKKEMNAKKTEESKEGQKKQKEIKASSSESDATQPEKKKASTDPTAQKKEGKKEEKKEGKKEEKKEGSKKEEKKEEKKEGTKKEEKKEEKKKEGTKEEKKEGKKEEKEKQAPDATQRTVHIKSLPFSVTDDQLTEVFSTFGEVEESHTVKDKNTGRPLGYGFVVFQKAASATEAIKTSTLEINRKRCTLHHASEGEARKAQQQPLQKKGATGPQKEGGQAEKNQTRLVCVRNLPFESDIYGIKQIFQKCGEIVKVDVVTDFKTKKGKGIAYLTFKEVEGVTAAIKMNGDKSMGRPISVTRANKKKKNKGKK
A. thaliana	NP_001030860.1	218	MYDHFIKYGDILEAVIISDKLTRRSKGYGFVTFKDAKAATRACEDSTPIINGRRANCNLASLGGRLRPKNGNRATPPHVGNHSQWYYPSGFTNQQHQQQNHQAVPFYGYPSAYVAPNMTFNQKVGYVGGTYMNGYYAQMQPQPQSQPQPQYYHHHMYGGGRVMVGAASPMVPFYTVYPYHQSQAIGFPQPSFSKPLSFSTPPISGTVGGESIQKKAIH
A. thaliana	NP_001030925.1	294	MAASCFAIPLSSSSRSSHNAIPKYKTLISSSSYSYLESLKLQFSSSNSFHHSSLSRPFVAQPLQIKVSSSELSVLDEEKEEEVVKGEAEPNKDSVVSKAEPVKKPRPCELYVCNIPRSYDIAQLLDMFQPFGTVISVEVVSRNPQTGESRGSGYVTMGSINSAKIAIASLDGTEVGGREMRVRYSVDMNPGTRRNPEVLNSTPKKILMYESQHKVYVGNLPWFTQPDGLRNHFSKFGTIVSTRVLHDRKTGRNRVFAFLSFTSGEERDAALSFNGTQYEGRRIIVREGIEKSES
A. thaliana	NP_001078385.1	144	MAFCNKLGGLLRQNISSNGNVPVTSMLGSLRLMSTKLFIGGLSWGTDDASLRDAFAHFGDVVDAKVIVDRETGRSRGFGFVNFNDEGAATAAISEMDGKELNGRHIRVNPANDRPSAPRAYGGGGGYSGGGGGYGGGGDGGGGF
A. thaliana	NP_001078386.1	129	MAFCNKLGGLLRQNISSNGNVPVTSMLGSLRLMSTKLFIGGLSWGTDDASLRDAFAHFGDVVDAKVIVDRETGRSRGFGFVNFNDEGAATAAISEMDGKELNGRHIRVNPANDRPSGGYGGGGDGGGGF
A. thaliana	NP_001119208.1	175	MKIFISSTFLRLLDFLNVFLIVGTFLSLIFFDTCDRDVAQHYANENVDTRYTKIYVGGLPWETRNEGLRSYFEQFGDIIHVNMVCDRETGRSEGYGFVTFRDAESATRACQNPKPVIDGREAKCNLAYIGGRVNNNQNAQQQQVLPMYPTGTSFHHPNIIPTHLMVIGHPMALTT
A. thaliana	NP_001154290.1	379	MERKLVVLGIPWDIDSDGLKDYMSKFGDLEDCIVMKDRSTGRSRGFGYVTFASAEDAKNALKGEHFLGNRILEVKVATPKEEMRQPAKKVTRIFVARIPSSVSESDFRSHFERYGEITDLYMPKDYNSKQHRGIGFITFSSADSVEDLMEDTHDLGGTTVAVDRATPKEDDHPPRPPPVARMSRPPVAIAGGFGAPGGYGAYDAYISAATRYAALGAPTLYDNPATFYGRGEPTTRGIGNKIFVGRLPQEASVDDLRDYFGRFGHIQDAYIPKDPKRSGHRGFGFVTFAENGVADRVARRSHEICGQEVAIDSATPLDEAGPSAGASSMLSSSRPEYFGGYGGPMRAFGRMYGGMSLDDWGYGMPNARPSRPDRRYRPY
A. thaliana	NP_001185049.1	274	MAYHSIPSSGFHYLNSPFGDTTFTKVFVGGLAWETQSETLRRHFDQYGDILEAVVITDKNTGRSKGYGFVTFRDPEAARRACVDPTPIIDGRRANCNLASLGRSRPPMQYAVIPHAPGRVRPPSPYVGSVQSPRGLHFGSHPYHQPPTYNYQQGVVYPYGVTPYGPDYMYSQSQGFYGPYMGQQYLQVYGVPGAVNSPGYQYGQLSHTIPGAHGYTAGQGYSHPGSHVLQLGATSPMSAIQSPYPSPSAPTHQRVIVQTPPQYIQSSGSDQTTG
A. thaliana	NP_001190078.1	342	MSASASSLSAFNPKSLPLCVSRPASVSVLPPSLSFKLHSDHLVSIFASSALKCSSPAEYPSRFVRNVAVSSDFEVEEDDMFADGDDSAPVERNSFSPDLKLFVGNLSFNVDSAQLAQLFESAGNVEMVEVIYDKVTGRSRGFGFVTMSTAAEVEAAAQQFNGYEFEGRPLRVNAGPPPPKREESFSRGPRSGGYGSERGGGYGSERGGGYGSERGGGYGSERGGGYGSQRSGGGYGGSQRSSYGSGSGSGSGSGSGNRLYVGNLSWGVDDMALENLFNEQGKVVEARVIYDRDSGRSKGFGFVTLSSSQEVQKAINSLNGADLDGRQIRVSEAEARPPRGQF
A. thaliana	NP_001190079.1	363	MSASASSLSAFNPKSLPLCVSRPASVSVLPPSLSFKLHSDHLVSIFASSALKCSSPAEYPSRFVRNVAVSSDFEVEEDDMFADGDDSAPVERNSFSPDLKLFVGNLSFNVDSAQLAQLFESAGNVEMVEVIYDKVTGRSRGFGFVTMSTAAEVEAAAQQFNGYVSRYLCSLLCLYLLIRVLCGLEFEGRPLRVNAGPPPPKREESFSRGPRSGGYGSERGGGYGSERGGGYGSERGGGYGSERGGGYGSQRSGGGYGGSQRSSYGSGSGSGSGSGSGNRLYVGNLSWGVDDMALENLFNEQGKVVEARVIYDRDSGRSKGFGFVTLSSSQEVQKAINSLNGADLDGRQIRVSEAEARPPRGQF
A. thaliana	NP_001322434.1	274	MAYHSIPSSGFHYLNSPFGDTTFTKVFVGGLAWETQSETLRRHFDQYGDILEAVVITDKNTGRSKGYGFVTFRDPEAARRACVDPTPIIDGRRANCNLASLGRSRPPMQYAVIPHAPGRVRPPSPYVGSVQSPRGLHFGSHPYHQPPTYNYQQGVVYPYGVTPYGPDYMYSQSQGFYGPYMGQQYLQVYGVPGAVNSPGYQYGQLSHTIPGAHGYTAGQGYSHPGSHVLQLGATSPMSAIQSPYPSPSAPTHQRVIVQTPPQYIQSSGSDQTTG
A. thaliana	NP_001323029.1	241	MEDTTFTKVFVGGLAWETHKVSLRNYFEQFGDIVEAVVITDKSSGRSKGYGFVTFCDPEAAQKACVDPAPVIDGRRANCNLAAFGVQRSKPSSPIHGHVGGRGMKVTSPFKTHFGTAATAIPSPLPFSHYTLPYTNPFGFSSYSMDYNYPTQSYYNVYGGATAQHPMYGSGPMTGVAAAPAAGFYPYLQFAEGNGPVTGYAPLHYPNHMFHYSAPGGNYPHHNGSPVSLAPSPVIPSVPQA
A. thaliana	NP_001324122.1	336	MAQQRQFQMEGGNNNTTDTKLTKIFVGGLAWETQRDTMRRYFEQFGEIVEAVVITDKNTGRSKGYGFVTFKEAEAAMRACQNMNPVIDGRRANCNLACLGAQKPRPPTSPRHGTGRFRSPGSGVGLVAPSPQFRGSSSSSAFVHQQQQQHTAQFPFPYSTYGFSGYSQEGMYPMNYYNHHLYGGQQFSPYMGHPSAGSTGMFHGFYPYYPQYNAAQSSNQAQAQVQAQHHQGFSFQYTAPPAPPLLQYPYLPHQPHFSSQQQFSSQQPPPPILSLPTSLALSLPSSSSPSSSTSTSAATTATKTVVITTATKKAETEASSKDGNEAMTTSTIKIEG
A. thaliana	NP_001327150.1	260	MTTSNNVNGCFGDTKLTKVFVGGLAWDTHKEAMYDHFIKYGDILEAVIISDKLTRRSKGYGFVTFKDAKAATRACEDSTPIINGRRANCNLASLGGRLRKSPTMTSPQQGPKNGNRATPPHVGNHSQWYYPSGFTNQQHQQQNHQAVPFYGYPSAYVAPNMTFNQKVGYVGGTYMNGYYAQMQPQPQSQPQPQYYHHHMYGGGRVMVGAASPMVPFYTVYPYHQSQAIGFPQPSFSKPLSFSTPPISGICHSISKPYNGS
A. thaliana	NP_001328008.1	329	MASSIVTSSLKPLAMADSSSSTIFSHPSISSTISSSRIRSSSVSLLTGRINLPLSFSRVSLSLKTKTHLKKSPFVSFVAQTSDWAEEGGEGSVAVEETENSLESQDVSEGDESEGDASEGDVSEGDESEGDVSEGAVSERAEFPEPSEEAKLFVGNLAYDVNSQALAMLFEQAGTVEIAEVIYNRETDQSRGFGFVTMSSVDEAETAVEKFNRYDLNGRLLTVNKAAPRGSRPERAPRVYEPAFRVYVGNLPWDVDNGRLEQLFSEHGKVVEARVVYDRETGRSRGFGFVTMSDVDELNEAISALDGQNLEGRAIRVNVAEERPPRRGY
A. thaliana	NP_001329851.1	70	MLREAFSGYGNVVDAIVMRDRYTDRSRGFGFVTYSSHSEAEAAVSGMDGKELNGRRVSVKLFGIGDIDDE
A. thaliana	NP_001330940.1	309	MAFLSKFGNILKQTTNKQLNAQVSLSSPSLFQAIRCMSSSKLFIGGMAYSMDEDSLREAFTKYGEVVDTRVILDRETGRSRGFGFVTFTSSEAASSAIQALDGRDLHGRVVKVNYANDRTSGGGFGGGGYGGGGGGYGGSGGYGGGAGGYGGSGGYGGGAGGYGGNSGGGYGGNAAGGYGGSGAGGYGGDATGHGGAGGGYGSSGGFGSSGNTYGEGSSASAGAVGDYNGSSGYGSANTYGSSNGGFAGDSQFGGSPVGNSSQFGGDNTQFTAGGQFGGEDQFGSMEKSETKMEDGPIGGEFEDVAKRA
A. thaliana	NP_001331799.1	113	MFSSLFVRCNSITSPLRCFAIRGSCSKLFVGGLSYDTNEPVLKNEFEKYGEIIEVKVICDHKSGKSKGYGFVLFDSEEAAASALASMDNQLLEGRNIRVEYAQPKRSLYQNPK
A. thaliana	NP_174613.2	245	MEDTTFTKVFVGGLAWETHKVSLRNYFEQFGDIVEAVVITDKSSGRSKGYGFVTFCDPEAAQKACVDPAPVIDGRRANCNLAAFGVQRSKPSSPIHGHVGGRGMKVTSPFKTHFGTAATAIPSPLPFSHYTLPYTNPFGFSSYSMDYNYPTQSYYNVYGGATAQHPMYGSGPMTGVAAAPAAGFYPYLQFAEGNGPVTGYAPLHYPNHMFHYSAPGGNYPHHNGSPVSLAPSPVIPSVCFAVPQA
A. thaliana	NP_176208.1	258	MAASSVLLSCFKSHHQPNLLHGCNYSSNQTLLRFNFSTPKPLLISSRSCSRRFRVLSETITVKLEEEEKDDGASAVLDPPAAVNTKLYFGNLPYNVDSATLAQIIQDFANPELVEVLYNRDTGQSRGFAFVTMSNVEDCNIIIDNLDGTEYLGRALKVNFADKPKPNKEPLYPETEHKLFVGNLSWTVTSESLAGAFRECGDVVGARVVFDGDTGRSRGYGFVCYSSKAEMETALESLDGFELEGRAIRVNLAQGKKF
A. thaliana	NP_177325.2	461	MASSSSQRRCVFVGNIPYDATEEQLREICGEVGPVVSFRLVTDRETGKPKGYGFCEYKDEETALSARRNLQSYEINGRQLRVDFAENDKGTDKTRDQSQGGPGLPSTTTVTESQKQIGGPVDSNMHQPVGLHLATTAASVIAGALGGPQVGSQFTQSNLQVPASDPLALHLAKMSRSQLTEIISSIKLMATQNKEHARQLLVSRPQLLKAVFLAQVMLGIVSPQVLQSPNIVQAPSHMTGSSIQDAQLSGQNLLPPLAQRSQQLSRAPHSQYPVQQSSKQPFSQIPQLVAQPGPSSVNPPPRSQVKVENAPFQRQQVVPASTNIGYSSQNSVPNNAIQPSQVPHQALPNSVMQQGGQTVSLNFGKRINEGPPHQSMNRPSKMMKVEDRRTTSLPGGHVS…
A. thaliana	NP_177525.2	388	MAGKQIGGDGGLPANLAGMTKSQLYDIMSQMKTLIDQNHQQAREILIRNPLLTKALFQAQIMLGMVQPPQVTPKVEPQAVQQPQQSHQSIPPKPNVQAHMSSFQGGGSVHEPANTMQPQAPIRKHPTPQPMPMPPPPPSVSANSAQSQPRFSHPQRQGHLNPAVTSMSHPQSSQVQNAPPPASHHPTSQQPPFHHLDIPASSTQLQQQPMHSGGGPHVAQQQSRPYHHQYGQAQTGPNTGFQHHGAPTQHLSQPMYHSGNRPPASGGPQFPQGQPHLPSQPTYQGGGQYRGDYNNNQLAGLMAQDRGPSWMAGQSESSNITHLPGLGPVPPPSQVGPGGGPPPRPAPISAEMEKALLQQVMSLTPEQINLLPPEQRNQVLQLQQILRQ
A. thaliana	NP_177563.1	289	MAFLSKVGRLFSQTSSHVTASSSMLQSIRCMSSSKIFVGGISYSTDEFGLREAFSKYGEVVDAKIIVDRETGRSRGFAFVTFTSTEEASNAMQLDGQDLHGRRIRVNYATERGSGFGGRGFGGPGGGYGASDGGYGAPAGGYGGGAGGYGGNSSYSGNAGGGGGYGGNSSYGGNAGGYGGNPPYSGNAVGGGGGYGSNFGGGGGYGVAGGVGGSENFAQGSSTNAGFDDKFESNQPLGNDTDHQTESGLGGDEQFGGSDNQFGDAENGNTENGPVGFDQTDDGDVAKRA
A. thaliana	NP_179031.2	85	MASTNVEFTCYVGNLESDTEENDLKNAFSQFGDVIHSNVICERDYEYFDYENGYEYDLPVSVTTRKVYGFVSFKDEKSMKDAIKG
A. thaliana	NP_179760.1	176	MASGDVEYRCFVGGLAWATDDRALETAFAQYGDVIDSKIINDRETGRSRGFGFVTFKDEKAMKDAIEGMNGQDLDGRSITVNEAQSRGSGGGGGHRGGGGGGYRSGGGGGYSGGGGSYGGGGGRREGGGGYSGGGGGYSSRGGGGGSYGGGRREGGGGYGGGEGGGYGGSGGGGGW
A. thaliana	NP_179762.1	117	MATNVEYTCFVRGLDQDTDEKDLTDIFSKFGNVIDSKIIYDRDTGKSRRFGFVTFEEEKSMTDAIMIMDVEESRSKCVNVGSITVEVARQRRKNRSAEFALELVRLINEKQKKMAGL
A. thaliana	NP_181259.1	289	MAASASSLALSSFNPKSLPFGVSRPASVSLLSPSLSFKLNSDSVSFSIAAKWNSPASRFARNVAITSEFEVEEDGFADVAPPKEQSFSADLKLFVGNLPFNVDSAQLAQLFESAGNVEMVEVIYDKITGRSRGFGFVTMSSVSEVEAAAQQFNGYELDGRPLRVNAGPPPPKREDGFSRGPRSSFGSSGSGYGGGGGSGAGSGNRVYVGNLSWGVDDMALESLFSEQGKVVEARVIYDRDSGRSKGFGFVTYDSSQEVQNAIKSLDGADLDGRQIRVSEAEARPPRRQY
A. thaliana	NP_182201.4	336	MAQQRQFQMEGGNNNTTDTKLTKIFVGGLAWETQRDTMRRYFEQFGEIVEAVVITDKNTGRSKGYGFVTFKEAEAAMRACQNMNPVIDGRRANCNLACLGAQKPRPPTSPRHGTGRFRSPGSGVGLVAPSPQFRGSSSSSAFVHQQQQQHTAQFPFPYSTYGFSGYSQEGMYPMNYYNHHLYGGQQFSPYMGHPSAGSTGMFHGFYPYYPQYNAAQSSNQAQAQVQAQHHQGFSFQYTAPPAPPLLQYPYLPHQPHFSSQQQFSSQQPPPPILSLPTSLALSLPSSSSPSSSTSTSAATTATKTVVITTATKKAETEASSKDGNEAMTTSTIKIEG
A. thaliana	NP_187353.2	317	MSQTNNHDTRVTKIFVGNLTWRTTADDLRRYFEQFGQVVDANVVSETYPGRSKGYGFITFRDYVSTVRALQNSKPIIDGRTTNCNLASAGAKQNMNHPNLNGSFNYVIPPHQYQQAPQHVIPYCPPHTWNHVWGQYIYMYNNNPCYYYPTQMIHNRSDFMTHLAWHQTNRRPVIISTPPRSSVQTESISETDQELIADVAHHDNEEAVTKSDSDVDQQKAKNVKGKNIGQDGDIKQDARDQEEKINDQEDSIKQDVDEEQNKISGIEKVVENQEVKIMCEQKHGTKQDEDVTKEFDCGIEVTHQDKRVFEEVDEDTP
A. thaliana	NP_187457.1	143	MMKNGIELLVRRVSAIPQHSISSSFHFLPQFCTSSSASPSSKLFIGGLSWSVDEQSLKDAFSSFGEVAEVRIAYDKGSGRSRGFGFVDFAEEGDALSAKDAMDGKGLLGRPLRISFALERVRGGPVVVPRLGKSKRERERVFK
A. thaliana	NP_187651.1	261	MKKRKIHHSDDEEDDTFYYRYSSVAAPPPSNPKHQPSSSAKSSAPGGGSGGLAPSKSTLYVSNLDFSLTNSDIHTLFSTFGKVARVTVLKDRHTRQSRGVAFVLYVSREDAAKAARSMDAKILNGRKLTVSIAADNGRASEFIKKRVYKDKSRCYECGDEGHLSYECPKNQLGPRERPPPPKKRGRRKEEEGEAEEISWSAAAPSLAVAEEEFEEENWASVVDNEAGERLRKREAEEEEERRMKRKEKKVSYFSDESDDED
A. thaliana	NP_188119.1	404	MDMMKKRKLDENGNGLNTNGGGTIGPTRLSPQDARKIIERFTTDQLLDLLQEAIVRHPDVLESVRLTADSDISQRKLFIRGLAADTTTEGLRSLFSSYGDLEEAIVILDKVTGKSKGYGFVTFMHVDGALLALKEPSKKIDGRVTVTQLAASGNQGTGSQIADISMRKIYVANVPFDMPADRLLNHFMAYGDVEEGPLGFDKVTGKSRGFALFVYKTAEGAQAALADPVKVIDGKHLNCKLAVDGKKGGKPGMPQAQDGGSGHGHVHGEGMGMVRPAGPYGAAGGISAYGGYSGGPPAHHMNSTHSSMGVGSAGYGGHYGGYGGPGGTGVYGGLGGGYGGPGTGSGQYRMPPSSMPGGGGYPESGHYGLSSSAGYPGQHHQAVGTSPVPRVPHGGMYPN…
A. thaliana	NP_189025.1	136	MAFCNKLSGILRQGVSQSSNGPVTSMLGSLRYMSSKLFVGGLSWGTDDSSLKQAFTSFGEVTEATVIADRETGRSRGFGFVSFSCEDSANNAIKEMDGKELNGRQIRVNLATERSSAPRSSFGGGGGYGGGGGGGY
A. thaliana	NP_189273.1	245	MSEDPEYRCFIGGLAWTTSDRGLRDAFEKYGHLVEAKVVLDKFSGRSRGFGFITFDEKKAMDEAIAAMNGMDLDGRTITVDKAQPHQGGAGRDNDGDRGRDRGYDRDRSRPSGGRGGGDCFKCGKPGHFARECPSESSRDGGGRFSSKDDRYSSKDDRYGAKDDRYGAKEDRYGAKDDRYSSKDDRYSSKDDRYGSRDGGGSRYGPDRSGERAGGRSRDGGSRGAPGGERHSRAPYDRPRAGGFH
A. thaliana	NP_190188.1	102	MAKRISAQLFVSRLSAYTTDQSLRQLFSPFGQIKEARLIRDSETQRPKGFGFITFDSEDDARKALKSLDGKIVDGRLIFVEVAKNAEEVRAGINSNKAEDRG
A. thaliana	NP_190806.1	329	MSSAYCSSAVAVSAAATASSAATFNPLLSSHSNSQLFYRFTPKSFKLVANCPNPLILHSNIRRHRFFCAAETEASSADDEIQASVEEEEEVEEEGDEGEEEVEEEKQTTQASGEEGRLYVGNLPYTITSSELSQIFGEAGTVVDVQIVYDKVTDRSRGFGFVTMGSIEEAKEAMQMFNSSQIGGRTVKVNFPEVPRGGENEVMRTKIRDNNRSYVDSPHKVYAGNLGWNLTSQGLKDAFGDQPGVLGAKVIYERNTGRSRGFGFISFESAENVQSALATMNGVEVEGRALRLNLASEREKPTVSPPSVEEGETEEASLESNEVLSNVSA
A. thaliana	NP_190914.1	342	MSASASSLSAFNPKSLPLCVSRPASVSVLPPSLSFKLHSDHLVSIFASSALKCSSPAEYPSRFVRNVAVSSDFEVEEDDMFADGDDSAPVERNSFSPDLKLFVGNLSFNVDSAQLAQLFESAGNVEMVEVIYDKVTGRSRGFGFVTMSTAAEVEAAAQQFNGYEFEGRPLRVNAGPPPPKREESFSRGPRSGGYGSERGGGYGSERGGGYGSERGGGYGSERGGGYGSQRSGGGYGGSQRSSYGSGSGSGSGSGSGNRLYVGNLSWGVDDMALENLFNEQGKVVEARVIYDRDSGRSKGFGFVTLSSSQEVQKAINSLNGADLDGRQIRVSEAEARPPRGQF
A. thaliana	NP_191037.1	261	MTTSNNVNGCFGDTKLTKVFVGGLAWDTHKEAMYDHFIKYGDILEAVIISDKLTRRSKGYGFVTFKDAKAATRACEDSTPIINGRRANCNLASLGGRLRKSPTMTSPQQGPKNGNRATPPHVGNHSQWYYPSGFTNQQHQQQNHQAVPFYGYPSAYVAPNMTFNQKVGYVGGTYMNGYYAQMQPQPQSQPQPQYYHHHMYGGGRVMVGAASPMVPFYTVYPYHQSQAIGFPQPSFSKPLSFSTPPISGTVGGESIQKKAIH
A. thaliana	NP_193121.1	158	MAFCNKLGGLLRQNISSNGNVPVTSMLGSLRLMSTKLFIGGLSWGTDDASLRDAFAHFGDVVDAKVIVDRETGRSRGFGFVNFNDEGAATAAISEMDGKELNGRHIRVNPANDRPSAPRAYGGGGGYSGGGGGYGGGGGGYGGGGGGYGGGGDGGGGF
A. thaliana	NP_193122.2	87	MATRVYVGNLSPTTTDDMLREAFSGYGNVVDAIVMRDRYTDRSRGFGFVTYSSHSEAEAAVSGMDGKELNGRRVSVKLFGIGDIDDE
A. thaliana	NP_194208.1	329	MASSIVTSSLKPLAMADSSSSTIFSHPSISSTISSSRIRSSSVSLLTGRINLPLSFSRVSLSLKTKTHLKKSPFVSFVAQTSDWAEEGGEGSVAVEETENSLESQDVSEGDESEGDASEGDVSEGDESEGDVSEGAVSERAEFPEPSEEAKLFVGNLAYDVNSQALAMLFEQAGTVEIAEVIYNRETDQSRGFGFVTMSSVDEAETAVEKFNRYDLNGRLLTVNKAAPRGSRPERAPRVYEPAFRVYVGNLPWDVDNGRLEQLFSEHGKVVEARVVYDRETGRSRGFGFVTMSDVDELNEAISALDGQNLEGRAIRVNVAEERPPRRGY
A. thaliana	NP_195637.1	169	MSEVEYRCFVGGLAWATNDEDLQRTFSQFGDVIDSKIINDRESGRSRGFGFVTFKDEKAMRDAIEEMNGKELDGRVITVNEAQSRGSGGGGGGRGGSGGGYRSGGGGGYSGGGGGGYSGGGGGGYERRSGGYGSGGGGGGRGYGGGGRREGGGYGGGDGGSYGGGGGGW
A. thaliana	NP_196048.1	310	MAAKEGSRIFVGGLSPEVTDRDLERAFSRFGDILDCQIMLERDTGRSRGFGFITFADRRAMDESIREMHGRDFGDRVISVNRAEPKLGRDDGESHGSRGGRDSGYSIAGKGSFGGGGGGGGRVGEDECFKCGRVGHWARDCPSAGGGRGGPVGGFSSRASAYGGSDGRVDRYADRDRYVDRERYIDDRYDGAARYGARDRFDSREAYIPRDRYASDRYAAPADRFAGGDRYSRGSDRYPPGSYDKARSFERDIAPSAGSDRYGGGRAGGPIRGGGEEGRGFRSRAGAPYERPSRSGGGGAYPSSSTFDRY
A. thaliana	NP_196239.1	146	MAALARIGGRHLKSVCLINSSASCFFTQRRGVASKLFIGGLSFCTTEQGLSEAFSKCGQVVEAQIVMDRVSDRSKGFGFVTFASADEAQKALMEFNGQQLNGRTIFVDYAKAKQSLGGGGGYPIARGPPDPAVIAATRTTETSKSD
A. thaliana	NP_199836.1	289	MTSSVLTPSLKLLAMTNSSSSTLFCIPSIFNISSSESHRFNFSLSSRPVNLTLSLKSKTLRNSSPVVTFVSQTSNWAEEEEGEDGSIGGTSVTVDESFESEDGVGFPEPPEEAKLFVGNLPYDVDSQALAMLFEQAGTVEISEVIYNRDTDQSRGFGFVTMSTVEEAEKAVEKFNSFEVNGRRLTVNRAAPRGSRPERQPRVYDAAFRIYVGNLPWDVDSGRLERLFSEHGKVVDARVVSDRETGRSRGFGFVQMSNENEVNVAIAALDGQNLEGRAIKVNVAEERTRR
A. thaliana	NP_200179.1	169	MSHHHQNFDTTFTKIYVGGLPWTTRKEGLINFFKRFGEIIHVNVVCDRETDRSQGYGFVTFKDAESATRACKDPNPTIEGRITNCKLAFVGAKVKPNQSQPSNLPQLLPRYDPQYNPRYDPMSYQQNRMANNTNNGIGSIQLQTLLTENRAAHRLRERSQSFFRHRDLR
A. thaliana	NP_200183.1	100	MSHPNDRETKIYVAGLPWITRTEGLISYFERFGEIVYAKVVCDGATQRSKGFGFVTFREVESATRACENPNHTIDGRTVNCKLAYLGARVHNYQPNQYGY
A. thaliana	NP_200794.1	157	MKADPRKETGIKLVAVEISLTFGNRKWQPHKNSGAKDEEAKFNKRTKYKMRIRPRSSISKRRRLIGGKTLTCVSNSGLSAYTTDQSLRQLFAPFARLIKDQQTQRPKGFGFITFESEDDAQKALKALNGKIVNGRLIFVETAKEVEAPTTSLKSNKD
A. thaliana	NP_200911.1	309	MAFLSKFGNILKQTTNKQLNAQVSLSSPSLFQAIRCMSSSKLFIGGMAYSMDEDSLREAFTKYGEVVDTRVILDRETGRSRGFGFVTFTSSEAASSAIQALDGRDLHGRVVKVNYANDRTSGGGFGGGGYGGGGGGYGGSGGYGGGAGGYGGSGGYGGGAGGYGGNSGGGYGGNAAGGYGGSGAGGYGGDATGHGGAGGGYGSSGGFGSSGNTYGEGSSASAGAVGDYNGSSGYGSANTYGSSNGGFAGDSQFGGSPVGNSSQFGGDNTQFTAGGQFGGEDQFGSMEKSETKMEDGPIGGEFEDVAKRA
A. thaliana	NP_564127.1	274	MAYHSIPSSGFHYLNSPFGDTTFTKVFVGGLAWETQSETLRRHFDQYGDILEAVVITDKNTGRSKGYGFVTFRDPEAARRACVDPTPIIDGRRANCNLASLGRSRPPMQYAVIPHAPGRVRPPSPYVGSVQSPRGLHFGSHPYHQPPTYNYQQGVVYPYGVTPYGPDYMYSQSQGFYGPYMGQQYLQVYGVPGAVNSPGYQYGQLSHTIPGAHGYTAGQGYSHPGSHVLQLGATSPMSAIQSPYPSPSAPTHQRVIVQTPPQYIQSSGSDQTTG
A. thaliana	NP_564168.2	291	MSNTSYYRSPFGDTTHTKVFVGGLAWETPTDEMRRYFDQFGEILEAVIITDKATGKSKGYGFVTFRDSDSATRAVADPNPVIDGRKANCNIASFGRPRPSTPRGRGQGGSPSQYQGGGQSSYTGMAAPVQQAAAAQLMYPSYGYTYNSEYGYHQALYNAQLQQAQYYQQQMYGGGGATSPSSSNIMPSPYYYLQAPSPRPYLHHQQHYQYHHHQQQQQQQQQRLPSASSYLIYPSNVEAPTPSNVPTSQGPLSSSTESHAPQQVSEEGGEFDPTDAPESTTTNIRDLTSSS
A. thaliana	NP_564184.1	249	MAGGIGLGDTTYTKVFVGGLAWETHKETMKKHFEQFGEILEAVVITDKASGRSKGYGFVTFREAEAARSACVDATPVIDGRRANCNLASLGLQRSKPSTPNHGGGGRINNMRVMMSTMQTGFGPPPPPQPPTFTHYPHLPLNLFGYSPYSPDYSSFPTNLYGMYGCTSGGQYGVYGNRNSGGGGLTAAAASATPFYPCGGGHGGVQFSQPQPFYHHLSSYNPHHYSPPTFSMQQGVTGFPLQPPLIPYR
A. thaliana	NP_565132.2	285	MAYQPVPGSGFHYLNSPFGDTTFTKVFVGGLAWETQSETLRQHFEQYGEILEAVVIADKNTGRSKGYGFVTFRDPEAARRACADPTPIIDGRRANCNLASLGRPRPPLPYAVIPNMPGRLRPASPYIGNVQGPRGSLIGNYPYQQPLPYNYQQGVVYPYGVTAYGPEYMYSQSQGLYSPYMGQQYLQVYGVPGAVNSPVYQYGQLSQTIPNGHGYTAVQGYSVPGSHILQLGGPTVSTMTTSSMPALQAPYPSGIPGPAPVQSHIIVHSPQFMQSTASDQTTSYS
A. thaliana	NP_565175.1	287	MSQTSYYRSPFGDTTYTKVFVGGLAWETPTDEMRRYFEQFGEILEAVIITDKNTGKSKGYGFVTFRESDSATRAVADPNPVIDGRKANCNIASFGRPRPSPPRGRGQTGSPSQYQSGGPSTYTGMAAPLPPAAAPQLMYPSYGYTYNPDQFGYHQALYNTQLQQAQYYQQQQQLYGGGATSPSSSGATIMPSPYYYGYSLQAPRVPYQHHHHLPQPYNPQQHHHQRFSSPSFLVYPSNSSFAPPLQGVLSSSTESEAVPQQVPAAEGEATTTAPEITTSNTKEPISS
A. thaliana	NP_566672.1	374	MEALIASTSFFVPISNSSSSHIINNRFFPSFYSPNLNFGTFRKTSLSSSHLVFSSSAISAPPSSTVLTRNSYWMVLLDKPPHWVSSKSAMVDYYVEILAKVLGNEKDAQVSIYDASFDTHFGFCCHIDEDASRQLASLPGVVSIRPEQDYSSEKKNYGIGSHKGVSLFDHGTVKHWMVRIDKPGVGIVTKAQMVDHCVQLLSKVLWNEKDAQMCLYHVSWQSDFGFCCDLDERSAVELAGVPGVLAVVPDNSFESLNKDYEGDSTQDSRDQDDSESPPVKTKKLFITGLSFYTSEKTLRAAFEGFGELVEVKIIMDKISKRSKGYAFLEYTTEEAAGTALKEMNGKIINGWMIVVDVAKTKPFRQNRSQPSFGL
A. thaliana	NP_568011.1	379	MERKLVVLGIPWDIDSDGLKDYMSKFGDLEDCIVMKDRSTGRSRGFGYVTFASAEDAKNALKGEHFLGNRILEVKVATPKEEMRQPAKKVTRIFVARIPSSVSESDFRSHFERYGEITDLYMPKDYNSKQHRGIGFITFSSADSVEDLMEDTHDLGGTTVAVDRATPKEDDHPPRPPPVARMSRPPVAIAGGFGAPGGYGAYDAYISAATRYAALGAPTLYDNPATFYGRGEPTTRGIGNKIFVGRLPQEASVDDLRDYFGRFGHIQDAYIPKDPKRSGHRGFGFVTFAENGVADRVARRSHEICGQEVAIDSATPLDEAGPSAGASSMLSSSRPEYFGGYGGPMRAFGRMYGGMSLDDWGYGMPNARPSRPDRRYRPY
A. thaliana	NP_849377.1	153	MAFCNKLGGLLRQNISSNGNVPVTSMLGSLRLMSTKLFIGGLSWGTDDASLRDAFAHFGDVVDAKVIVDRETGRSRGFGFVNFNDEGAATAAISEMDGKELNGRHIRVNPANDRPSAPRAYGGGGGYSYGGGGGGYGGGGGGYGGGGDGGGGF
A. thaliana	NP_849523.1	126	MSEVEYRCFVGGLAWATNDEDLQRTFSQFGDVIDSKIINDRESGRSRGFGFVTFKDEKAMRDAIEEMNGKELDGRVITVNEAQSRGSGGGGGGRGGSGGGYRSGGGGGYSGGGGGGYSGGGGGGGW
A. thaliana	NP_849524.1	92	MSEVEYRCFVGGLAWATNDEDLQRTFSQFGDVIDSKIINDRESGRSRGFGFVTFKDEKAMRDAIEEMNGKELDGRVITVNEAQSRGSGGGGW
A. thaliana	NP_849525.1	105	MSEVEYRCFVGGLAWATNDEDLQRTFSQFGDVIDSKIINDRESGRSRGFGFVTFKDEKAMRDAIEEMNGSGGGGGGRGYGGGGRREGGGYGGGDGGSYGGGGGGW
A. thaliana	NP_850017.1	159	MASGDVEYRCFVGGLAWATDDRALETAFAQYGDVIDSKIINDRETGRSRGFGFVTFKDEKAMKDAIEGMNGQDLDGRSITVNEAQSRGSGGGGGHRGGGSYGGGGGRREGGGGYSGGGGGYSSRGGGGGSYGGGRREGGGGYGGGEGGGYGGSGGGGGW
A. thaliana	NP_850629.1	136	MAFCNKLSGILRQGVSQSSNGPVTSMLGSLRYMSSKLFVGGLSWGTDDSSLKQAFTSFGEVTEATVIADRETGRSRGFGFVSFSCEDSANNAIKEMDGKELNGRQIRVNLATERSSAPRSSFGGGGGYGGGGGGGY
A. thaliana	NP_850692.2	342	MSASASSLSAFNPKSLPLCVSRPASVSVLPPSLSFKLHSDHLVSIFASSALKCSSPAEYPSRFVRNVAVSSDFEVEEDDMFADGDDSAPVERNSFSPDLKLFVGNLSFNVDSAQLAQLFESAGNVEMVEVIYDKVTGRSRGFGFVTMSTAAEVEAAAQQFNGYEFEGRPLRVNAGPPPPKREESFSRGPRSGGYGSERGGGYGSERGGGYGSERGGGYGSERGGGYGSQRSGGGYGGSQRSSYGSGSGSGSGSGSGNRLYVGNLSWGVDDMALENLFNEQGKVVEARVIYDRDSGRSKGFGFVTLSSSQEVQKAINSLNGADLDGRQIRVSEAEARPPRGQF
A. thaliana	NP_973888.1	242	MAGGIGLGDTTYTKVFVGGLAWETHKETMKKHFEQFGEILEAVVITDKASGRSKGYGFVTFREAEAARSACVDATPVIDGRRANCNLASLGLQRSKPSTPNHGGGGRINNMRVMMSTMQTGFGPPPPPQPPTFTHYPHLPLNLFGYSPYSPDYSSFPTNLYGMYGCTSGGQYGVYGNRNSGGGGLTAAAASATPFYPCGGGHGGVQFSQPQPFYHHLSSYNPHHYSPPTFSMQQVCFVVPQA
A. thaliana	NP_973889.1	347	MAGGIGLGDTTYTKVFVGGLAWETHKETMKKHFEQFGEILEAVVITDKASGRSKGYGFVTFREAEAARSACVDATPVIDGRRANCNLASLGLQRSKPSTPNHGGGGRINNMRVMMSTMQTGFGPPPPPQPPTFTHYPHLPLNLFGYSPYSPDYSSFPTNLYGMYGCTSGGQYGVYGNRNSGGGGLTAAAASATPFYPCGGGHGGVQFSQPQPFYHHLSSYNPHHYSPPTFSMQQGSRNRLSASTTSYSLPLKKLRVFGSYQASYHHLLLLRSRAILWFKGCSWLISALSFSPSALKATPFYGIWRWLFKQIPMGSPVSDGDHVVFVISHLLAIASSRENGFLFERYC
A. thaliana	NP_973958.1	244	MEDTTFTKVFVGGLAWETHKVSLRNYFEQFGDIVEAVVITDKSSGRSKGYGFVTFCDPEAAQKACVDPAPVIDGRRANCNLAAFGVQRSKPSSPIHGHVGGRGMKVTSPFKTHFGTAATAIPSPLPFSHYTLPYTNPFGFSSYSMDYNYPTSYYNVYGGATAQHPMYGSGPMTGVAAAPAAGFYPYLQFAEGNGPVTGYAPLHYPNHMFHYSAPGGNYPHHNGSPVSLAPSPVIPSVCFAVPQA
A. thaliana	NP_974169.1	271	MSQTSYYRSPFGDTTYTKVFVGGLAWETPTDEMRRYFEQFGEILEAVIITDKNTGKSKGYGFVTFRESDSATRAVADPNPVIDGRKANCNIASFGRPRPSPPRGRGQTGSPSQYQSGGPSTYTGMAAPLPPAAAPQLMYPSYGYTYNPDQFGYHQALYNTQLQQAQYYQQQQQLYGGGATSPSSSGATIMPSPYYYGYSLQAPRVPYQHHHHLPQPYNPQQHHHQRFSSPSFLVYPSNSSFAPPLQGVLSSSTGTYLINSFFFFIFLWIYF
A. thaliana	NP_974317.1	404	MDMMKKRKLDENGNGLNTNGGGTIGPTRLSPQDARKIIERFTTDQLLDLLQEAIVRHPDVLESVRLTADSDISQRKLFIRGLAADTTTEGLRSLFSSYGDLEEAIVILDKVTGKSKGYGFVTFMHVDGALLALKEPSKKIDGRVTVTQLAASGNQGTGSQIADISMRKIYVANVPFDMPADRLLNHFMAYGDVEEGPLGFDKVTGKSRGFALFVYKTAEGAQAALADPVKVIDGKHLNCKLAVDGKKGGKPGMPQAQDGGSGHGHVHGEGMGMVRPAGPYGAAGGISAYGGYSGGPPAHHMNSTHSSMGVGSAGYGGHYGGYGGPGGTGVYGGLGGGYGGPGTGSGQYRMPPSSMPGGGGYPESGHYGLSSSAGYPGQHHQAVGTSPVPRVPHGGMYPN…
C. elegans	NP_001293646.1	379	MVAAQNGAAAAVLRPHQIGSSPEAPQSQTSGGSTEQLQQQPLPPPTQQKQQQPLTIGPVAPNDRSTSSSSTDGPRRLHVSNIPFKYREPDLTAMFEKVGPVVDVEIIFNERGSKGFGFVTMQNPDDADRARAEFNGTTIEGRRVEVNLATQRVHNKKAKPLMSVGVDAMSAQNALISQQQQIQRAALLQQQLLAQQFLVPRHQQLMMPPTSAAAISQLQALQYQQALLAAQQQQQQMQNPQFLLSLQQQQQAQAQAPPTSMAQLIQHQQQFAMDPMAQAQAQAAQAQMVTLIAFEQQRMQLQAAAAAAQGRGVPQPGRIPTSTATTGSSQNQVAAGSIGEQYLQQSMQGAVPANFHHHSQALHPAAAAAAALQRRFAPY
C. elegans	NP_001362024.1	151	MYGQVQDPLVHAAAAALAQSTNAEPVVGSRDTMFTKIFVGGLPYHTSDKTLHEYFEQFGDIEEAVVITDRNTQKSRGYGFVTMKDRASAERACKDPNPIIDGRKANVNLAYLGAKPRTNVQLAALAAGQVQLPLTTQLQALFQPRMGQVAG
C. elegans	NP_493022.1	83	MSGIFSVYVGNAPFQTTEEELGNFFSSIGQINNVRIVCDRETGRPRGFAFIEFAEEGSAQRAVEQMNGAEFNGRPLRVNLANK
C. elegans	NP_493023.1	85	MSGFSVYVGNAPFQTTEDDLGNYFSQAGNVSNVRIVCDRETGRPRGFAFVEFTEEAAAQRAVDQFNGVDFNGRALRVNLAQNRNN
C. elegans	NP_493029.1	84	MASQGFSVYVGNVPYQGTEEEIGNYFAAVGHVNNVRIVYDRETGRPRGFAFVEFSEEAGAQRAVEQLNGVAFNGRNLRVNYANK
C. elegans	NP_495036.3	498	MSPPLRYQKDQQNQQHQQNQSQQAAHQMVSFMPQTPTSLPSTPIQLYPTGAAALIPAPPTYELIPNRIFVGGFPTSTTETELREHFEKFFAVKDVKMVKSLDGQSKGYGFITFETEDQAEEIRKLTPKQLEFRSRKLNLGPAIRKINSNSFQPSYAIATPSQLVAASPGPFSYAIPASPSPYSGYSYPASPQMFVYPPLRSQDQSRQQSEQQTTPQNSPTNLQHQQSPQVFFGGDQDPIRSYASAVAGVEKSEVSPEKHESVSPQPLLPNQNVLNTQYSQGQQQWNSNVQQQQQQQMDSNNGGPYYNENYSQGYTRPHPYQQFAQSGVYMNSQGMYHSSYSYMTPPLAPGQYPQMMSAPYWQQQQQHHQSHAYAGYNPAYNNWVGPSGDMNQFKQNPSN…
C. elegans	NP_497841.1	404	MTTAAEIITVEKLNDFDYKVALQQQMVAAQNGAAAAVLRPHQIGSSPEAPQSQTSGGSTEQLQQQPLPPPTQQKQQQPLTIGPVAPNDRSTSSSSTDGPRRLHVSNIPFKYREPDLTAMFEKVGPVVDVEIIFNERGSKGFGFVTMQNPDDADRARAEFNGTTIEGRRVEVNLATQRVHNKKAKPLMSVGVDAMSAQNALISQQQQIQRAALLQQQLLAQQFLVPRHQQLMMPPTSAAAISQLQALQYQQALLAAQQQQQQMQNPQFLLSLQQQQQAQAQAPPTSMAQLIQHQQQFAMDPMAQAQAQAAQAQMVTLIAFEQQRMQLQAAAAAAQGRGVPQPGRIPTSTATTGSSQNQVAAGSIGEQYLQQSMQGAVPANFHHHSQALHPAAAAAAALQR…
C. elegans	NP_499734.1	336	MMSGGYKSSGVGNDRSQRSVFVGNISYDVSEDTIRSIFSKAGNVLSIKMVHDRETGKPKGYGFIEFPDIQTAEVAIRNLNGYELSGRILRVDSAAGGMNMEEFGSSSNAPAPVEENPYGPECDAGKAPERISQTVASLAPEKMFELMKQLQESLKNNPSELHKFLVEHPQIAYAVLQAAVVMRIVDPQTALGLLHRNKAATLTPFHNTPQGAPPMVQQQQMPMPPKPTFAHPGPSMGPPMGPPMGPPMGHPQAPQYGQNYGQPVAPQQYKPPPQQQPPVQMRPPVQQPQQNHQEEQQNAELLMQVMQLSEHDLQMLPAGDREKIIELRQQLKRNVK
C. elegans	NP_504717.1	351	MQNTQIFTNFAHRAHDGLPFNSANPSNKDPIFTMPISVKPKTREPASFTDNRIYVSNIPFSFREQDLAAMFFAYGRVLSVEIVTNDRGSKGFGFVTLDSIESCEKARAALHESHVQGRIIEVRRATPTRRKLINNPQNEVLPPPKLCVDLRAPHNLWRAEPMHQLFKEKENTTCFPEAGFMMAPYRSNGIFNTRSLVQTKPPRCTKHSELKLSSAGEYFCKNGEPTTETSILMCMHRQNSPCSNKCSDSSNHELSDVELNSIFPHHLRDQITALLDTSNHFGSGNNSANKGKRAPSVTSSGLRSSESETVSDEEIHWSPHNSPDYLLAALYEGSTSFHGKSVSPPKESSSQ
C. elegans	NP_506360.1	114	MRSLARGVTTNISKLIEARPKNTGQTVYLTHVKWVTGKSQLEHYFKRYGSIQSVNMFYDPDTGLHRGFASITFDSKDGANKAIEQRPHVIDGDRVDVEPYIPLISKNKKKDLML
C. elegans	NP_508674.1	248	MYGQVQDPLVHAAAAALAQSTNAEPVVGSRDTMFTKIFVGGLPYHTSDKTLHEYFEQFGDIEEAVVITDRNTQKSRGYGFVTMKDRASAERACKDPNPIIDGRKANVNLAYLGAKPRTNVQLAALAAGQVQLPLTTQLQALFQPRMGLPQMYYPTVTGLVNPLMAQQGAAAQQQLFDYNALAAVMNPQAAAAYGIQSQGKFAAAPTTIEQYAAYPAGYGLVPQSAYNIGNPQLQQLAAAQQQLEHQRV
M. xanthus	N/A	N/A	N/A
S. cerevisiae	NP_011471.1	296	MNRQSGVNAGVQNNPPSRVVYLGSIPYDQTEEQILDLCSNVGPVINLKMMFDPQTGRSKGYAFIEFRDLESSASAVRNLNGYQLGSRFLKCGYSSNSDISGVSQQQQQQYNNINGNNNNNGNNNNNSNGPDFQNSGNANFLSQKFPELPSGIDVNINMTTPAMMISSELAKKPKEVQLKFLQKFQEWTRAHPEDAVSLLELCPQLSFVTAELLLTNGICKVDDLIPLASRPQEEASATNNNSVNEVVDPAVLNKQKELLKQVLQLNDSQISILPDDERMAIWDLKQKALRGEFGAF
S. cerevisiae	NP_011675.1	414	MAKTTKVKGNKKEVKASKQAKEEKAKAVSSSSSESSSSSSSSSESESESESESESSSSSSSSDSESSSSSSSDSESEAETKKEESKDSSSSSSDSSSDEEEEEEKEETKKEESKESSSSDSSSSSSSDSESEKEESNDKKRKSEDAEEEEDEESSNKKQKNEETEEPATIFVGRLSWSIDDEWLKKEFEHIGGVIGARVIYERGTDRSRGYGYVDFENKSYAEKAIQEMQGKEIDGRPINCDMSTSKPAGNNDRAKKFGDTPSEPSDTLFLGNLSFNADRDAIFELFAKHGEVVSVRIPTHPETEQPKGFGYVQFSNMEDAKKALDALQGEYIDNRPVRLDFSSPRPNNDGGRGGSRGFGGRGGGRGGNRGFGGRGGARGGRGGFRPSGSGANTAPLGR…
C. owczarzaki	XP_004343201.1	321	MSDSILSAIAYKFLTDAGHTAAAAALKKEVKKLPSAPEVTLGQLFEAYQARTSQKRKAEDEATPAAKRSKDESDSDSDSDSDSDSEEEEETKKKADSSSSESEEESDDSSSSESEEESEDKEDEKEDEEEESEEEEKPKSNGASANGHKQHNDERSAPSSVLFVGNLSWAVSKDDLYNHFSQYEGLTDARIAWDRDMDRSKGFGHVEFSNADSAAKALEELNGSDLGGRAIRLDFAGERANGGGNGASPRGGGFGGRGGFGGGRGGSPRGGGFGGRGGFGGRGGSPRGGGFGGRGGSPRGGGFGGRGGFGGGNNSRQTFDD
C. owczarzaki	XP_004348405.1	385	MKDSKCVFVGNISYDVTEQEVIDLCSQVGPVISFRLVFDRDTGKPKGFGFCEYTDAETAQSAIRNLNDLELKGRRIRVDFAESDAVIKFGGNTDRGDRGGGDRAERGERPGPGMHVSKFQQDSAPMDVASRAAPQHNPYQAAGPVYGQAPPAGGPPAAESINTTLASMPPAQIFEFLKQMKQFITGSPEQARQTLMFNPQLAYALLQAQLQLGLVDPEVAKKMIASIPQTSKSMQPPSHSHGGPSFVPGPQAPPQMHMGGPPPNQPPPPSFGPQGMHHQAPPSQGMGMMPGQHMGHMGGMGGAPSSQQNMPPMNMGQMPAPSGMMHQSAPLMAGPPPPPMGGGAPMTQEHQLLMQLMALTPQQIDMLPPDQRAAVHALRSQVGAQ
C. owczarzaki	XP_004349486.1	287	MAETAAAAPTTFNVFFGNIPFGTTEETLKNLFPGNADLIDAKVIRRGVRSMGYGFVEFRTEAAAKAAVDAWNKKEIEGRPVNVEISVKKERATTAPAATAGAAAAAAAPATGDAAARGAAAGGARRGRFNRGPRAPRAPRAEGAAPLTGAAPVAAAPAAAAPAGERRPRAPRAARPARTPRAPVDPSAPREESKTLLFVGNLPFTVTDNQLKTDTFAGFEVARAYVVPGRREGRSKGYGFVELNSEAEADRALAAVQGKTVEDRTITVKRALKTDSAGPAAAATATA
C. owczarzaki	XP_004364689.1	445	MAAAPAVVAPSQYHLDSNLHADSESHAMLNLRSPRSSSTRSSSIDSTSSATPSTHSLASSSSEAAVDESMLSSDGPDHSAGSDTPEPSFTIPADEPSLTASNPNNTSLTAQRPAPFNSANNNAQRAPPATLGHRIFVGGINWKGEESDLREFFAKLGTVVECKIIADRVTGASKGYGFVSFSDAHTAEAVKQMQNLVYMGKPLHLSDAVRKPKGLDAKSDGSDKGASSRGPLQYASLPPTHPSAPFGAPAATKPYETVGSLSAQTSALQQQQQQLQLLLQQQQQLLQQQQHQLQQFHAAFGFANQMSFPATSAQLPVQPFSATSVSASVLPAAGGVPMAQAAAGRSAEQAYLQYINHTAAAAAAAQQLQFHQMMYMDPAQLDGYAMQMTQPLQHQQPMA…
C. owczarzaki	XP_011270062.1	437	MAAAPAVVAPSQYHLDSNLHADSESHAMLNLRSPRSSSTRSSSIDSTSSATPSTHSLASSSSEAAVDESMLSSDGPDHSAGSDTPEPSFTIPADEPSLTASNPNNTSLTAQRPAPFNSANNNAQRAPPATLGHRIFVGGINWKGEESDLREFFAKLGTVVECKIIADRVTGASKGYGFVSFSDAHTAEAVKQMQNLVYMGKPLHLSDAVRKPKGLDAKSDGSDKGASSRGPLQYASLPPTHPSAPFGAPAATKPYETVGSLSAQTSALQQQQQQLQLLLQQQQQLLQQQQHQLQQFHAAFGFANQMSFPATSAQLPVQPFSATSVSASVLPAAGGVPMAQAAAGRSAEQAYLQYINHTAAAAAAAQQLQFHQMMYMDPAQLDGYAMQMTQPLQHQQPMA…
E. histolytica	XP_649106.1	229	MTKLYIGNLSYKTTEENLKTHFESFGKIKEAKLMIFRGYSRGFAFVEYETEEDAKKAVAANGVEFEGRKLKVEIARPPKERKEVPEGEKKTTAGPRGYRPRRFGPRRFTRKHFGKKTNGSRVNKKEKKEVPTEFSDNLIFVKNLAYAIKDEDLKEIFKEFNVVSAKVVTYNHRGNVRSKGYGFVEVKSAEDQKAAVEKLNGTTQKERAIGVFKAYKKQEQKEETPVTKA
E. histolytica	XP_650734.1	219	MTKIYVSNLSFQTKQEDMEKYFAVFGRFKSCILMVHRGRSKGFGFVEYETEEETNKALAANDIEFMGRKLHIQIAHPPKEHKEHYQYHERRFNHPRRGINRKPFNRNGTDDKHNTSDNKNEENNELSETLLFIRNLPYSINDEKLKELFAKYEPKEAVVVSYRKGSRIFSKGFGFVKVDNKEKQSAAIVEFNNFEIDGRKIIVSSGYKRQEGIKSIHDE
E. histolytica	XP_652707.1	199	MNRLEVYVGNLSLNTDKDKLKEVFASVGEIKNSRVATHKDGASKGFGFVTFNDEETAEKAVNEMNGKEIDGSIVVVQISRPQDRKRRDHYRSSYRHSYHGRSYDRSRSRSSRRRSRSRSSRRRYRSRSNRRHNRSRSRSSRRRYNRSRSVSSYSKSRRDKSSGGRSGSSSPKRGERKSFRVNDSSIPSKNEIPKGSDDK
E. histolytica	XP_654958.2	84	MGDKTDQDDNEYTNLYIGNIPYSSTEKDVKNFIQYDGCKITMVTDKNTGKTKGFAFVAFETHEQALEIKKQVTGKRIGKDVQLF
E. histolytica	XP_655048.1	320	MNRRLFVGNLEYQIKNFELKEFFERFGKVVDVVIMERYDGASKGFGYVEFDTEESAQKALREGNNEMLRGRNIRVDMATERKQHEHKERSRSRERNQHIFKTGAPFSFRDSFSRVKDFPVRRDFDYSRSYEFYNKNPQSFDKESKQVYCTDQRYDRMSFDPYVKKRQENYDFIYEPLERYRYDASLRSDGYMRRMDKYQESYKRGGERIIQRDELCNNDGLRTKETNFGLSETVIFVRNLPFSMDSFELKQLFEPCHSIDASVVYDRDTNKSKGYGFVVFDTSIDQHTAIEQFNNYLVEGRKIMVFKASLLQEERTKAMR
E. histolytica	XP_657084.1	136	MTRLYIGSLAYSVTDESLKAAFEKFGTVTDCKVVTDRDSQRSKGFGFVTFEKDEDAKKAIEEMNEQELEGRRIKVDVSRPREEGRRRDYRHDDRDSRRDYRSRDDHYRRDYHHDDRRDSHRDERRDSHRDDDKNYD
E. histolytica	XP_657381.1	301	MSSSEEKSIESEEVKEEVKEEVEKKDKKDKKDKKEKKEKKEKKDKKEKKEKKHKKDKKEKKEHKHHHHSKKEEEEKKEEEEEKKEESKMEEEHSKEEKEDESHSEEEKEENQSEEEKEKKEEKKDNETKEFIPVEDVKLVSVFVKNIPYGWATNDMYQYFASSGPVKTRVITNKETGKSRGFGYLDFVDLEAANKFVEEHQGEEVDGRPLFLDLADGKKGGDKDNNGGKFGAFGSSNKTGKQHTYKGKQGGDNVCFNCGKPGHMSRECPEPRKDNRKGGFKRSFNENKTETKNDPKHIRFD
A. castellanii	XP_004333241.1	506	MSATVNDRKLFIGGLSWSTTSETLRAAFEKYGKVEEAKVISEPGTGRSRGFGAVMYYNESDALAAYKGMHGVELEGRFLYVDRYRDGQERDRAAYRAAGYDRPYEGSRRGPTDSAAPYGRDGYERDYEPRGGYDRGGYDRMPYDARGAGGYPESAGGYGGYGARAAGGPPGGYGVPPPRGAYPGARGGYGGVGRGGALPMPPPYAAGGRGGFGGYDPYYGAPAAGVRGGYDARMDYYGEAAYGRGRGAAAAGYPPQHSAYGRRARPYDYPPSATGAYAGARPYDRYPASGYDERDYGRSASAAYDDRDRGGYADLDRARSASAYDDRDRSDRNGGHHHDDRSRELSRGGGGGYDDRRPGDRDVRSATGGYGDERSTSSSSSSWGAGAGAGSDWDSKERE…
A. castellanii	XP_004335560.1	84	MNRGGGGGSSQRCVFVGNIPYDATEEQLTEIFSSVGPVTCFRLVFDRETGKPKGFGFCEYRDTETAMSAMRNLNGYDINGRALR
A. castellanii	XP_004340009.1	147	MSAKLFVGGLSWGTDDNSLRSAFEQHGEVVDAKVIQDRDTGKSRGFGFVTFASADEAEAAKNALNQTELDGREIRVDSASDRDGGGGGGGRGGFRGGRGGGGGFRGGRGGGYGGDRGGRSSYGNRDRPYDRENTRGSYGRRRDDGDE
A. castellanii	XP_004340641.1	324	MEGSDSLGEHRVFVGGVSWKVNDATLHSFFENNYGPVIECKLIMDKQTGKSKGYGFVTFANPETAAAVKRMGTIPLMGKNVRSCHTPHPTPHPQLTKTTVYVQMNVGDAFRKGPGMGGGGGGGGMRMQQQHQQAPMHHQGMGMGGRPGGLLDRPPHQGQSSPYGHQTAPPPSQSAYPSTQPPSGGVYQQSGGYYQDPYQMNTGGYYGSQWSHQQPAAPAHQAQSVYGYPAAAQQSGYGSYAGYQQPVAQQQAYSYPQQQQGAYYLSRDHDHQLTINACYSFTPTAWPQQQLQQPPQQQQQMQQQQMQQQQQIQIQQQSYGSYGM
A. castellanii	XP_004348350.1	325	EGLNANGEEETKLYVAGLHWETNREKLQELFGQHGTVTDVKLIVDHFSGRSRGFAFVSFATSEDATAARDAMNSADVDGRRIFVKKAMAEGVGGGRGRGGFGGRGGFGGYGGWRGGFRGGMGGYPGFRGGFGGPYGGGYGGGGGYGGPYGGGGYGGGGGYGGGGGYGGYDRGYDRGYDRGYGGGGYDGYGGGGGYGGRGGFRGGEHSAYGRRDSPYGMPPRGSYGGRDSGYGGGYDSYGAPGGYGQGSDDRYSSSYGNYPPSGGGSGGSGAGSYGGSYGGSSSGGGSSSSGGGSGGGSSSGSSGSSSGYASYSGGDYSSSYSERK
A. castellanii	XP_004353220.1	425	MGKSKTNKKVKAEEPKKVEKVEKTKGKKAAKAEEEKKKKQQKKKEEKPAPMEVEDDSSSSSEESSSSEDEAPAKKAAPAKKAAAKKESSSEEESSSSESESEEEVKPAKKAAAAAAKKESSSEEESSSSEEESDEEEKKPAAAENKRKRDEEENGDDSSTGDAEESNTKKAKTDETPSNANFFIGNLPWSAEEDTVKQFFESQGVSAVYAVRLITDRDTGRKKGFGYIETSASDVDAVLALNGADFEGRELKVDKANERPANADRDTKPRDAPRQSGEAATDGNVFLGNLSFNSTEDSIWAALEQFGTVKAVRIVYDRETQRPRGFGYCEFEDADTANKAIAASGTVDVDGRQIRIDTATARSGGGGGGGGGGGGFRGGRGGGGFRGGRGGGRGGDRGG…
A. castellanii	XP_004353466.1	137	MNRLCLASRPAASLLIARQGSSAANRMAIRRFTEDINPSRLFIGGLSWGTDENKLKEAFEGFGEVRHVRVVVNRETGRSRGFGFVTFQSPEDAAAAAEAMHDKELDGRRLSVSYARNTPREGGFRQRPVEGKEEESM
A. castellanii	XP_004353567.1	384	MGRTSSSGRKGTAVGEPKAWPKEQLLKEAYELHRQRKKALALNPRPRPDSAGSGSGKQSAGANAPAPSLATSRRDSSGTLGDATKQARASLAAAPLAGETKDTGFKRPAKLQRKLDEIKENPLAPEEKPAKKRRTSGDEGRPTEEQPAPYYAPYAGGYSRGHLEEPVDGDYYPTTIFVGGLADDVEERDLERVFSRFGPIDAIRLISNKNFGFIKFRTPDACQASILGMNGEILNGSRVRVDRARVARPPWQRRPWGERRPYPPRDDGHGGGGDDYYRGGPPDGSDYGSGGGGGGGYMPRDREREPPYGLASLRGESTPVPFPPTPQQQQQPYSAPPPSASSPSLVPPQPGNPPQRDRSPEGSPGLEADSGESSSRRAVQYDDL
A. castellanii	XP_004368045.1	146	MSAKLFVGGLSWSTDDNSLRSAFEQHGEVIDAKVILDRDTGKSRGFGFVTFSSADEAEAAKGALNQTDLDGREIRVDSASDRDSGGGGGGRGGFRGGRGGGGGFRGGRGGGYGGDRGGRSSYGNRDRPYDRDNTRGSYSRRDDRDE
F. alba	XP_009493770.1	1524	MSRNENTVFVANIPFEATEQEVIQVMQRAGPVVSFRFHIDPKTGKSKGSGFCDYVDALSAQSAIRNINKSLTLHNRPLRVSAPTSSSSSSGGGSHGGGGGGGGGGHGGHGGHGGGAGGVGGHSGMSMMGGPMALGGGPGGVHSRPMGPGPMGSPAVLNALQMPGFGASDGRSNPIGVLERIRSTVHTMSAQQMSELLLELKHMTIHEPLKLKALLQDHPAFAFATLEALITTGVIRDDHPSFHTDYDSSYSGTGAGAGAGAHHPGIVLSSLTSPPTTAGSPPGFAPGPPPGAGPPMHRHPMVPGGMPPGGPPPPPPGGPHLGPMAGGPGGSPPPGAHLSPPGAGGPASLPPGPGGPGESVQKLQADSRAQKIELHKLSEESSILNFHNGRLTRRVESLQ…
