# Supplementary material for: Abundantly expressed class of noncoding RNAs conserved through the multicellular evolution of dictyostelid social amoebas
Source: HighWire-hosted journal article supplement (doi:10.1101/gr.272856.120), 2021-01-21

**Supplemental Figure S8.** Shared synteny between *D. discoideum* and *D. firmibasis* Class I RNA loci.

Representation of *D. firmibasis* (dfi) Class I RNA loci +/- 10 kb that share synteny with *D. discoideum* (ddi) Class I RNAs supported by at least two orthologous genes (connected with dashed lines).

Chromosome/contig names are given to the left of the genes. Genes situated on the forward and the reverse strand are indicated above and below the chromosome/contig, respectively. Vertical grey lines are given at every 1000 nt.

dfi: DDB0232433

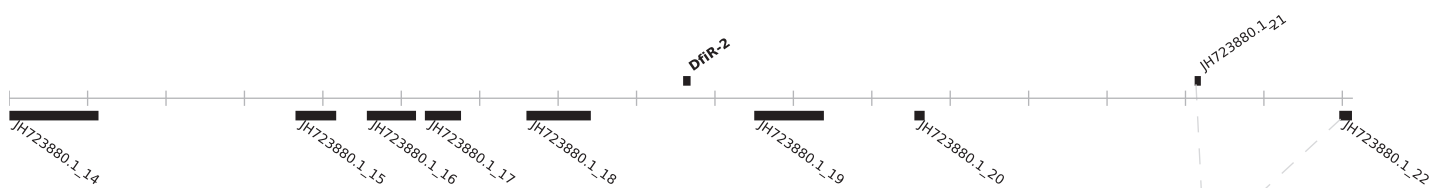

ddi: DDB0232433

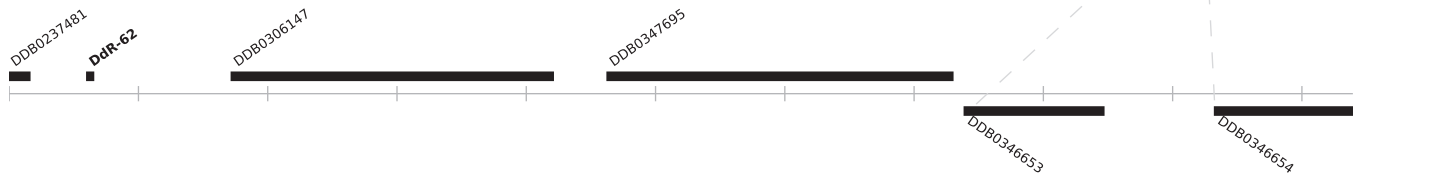

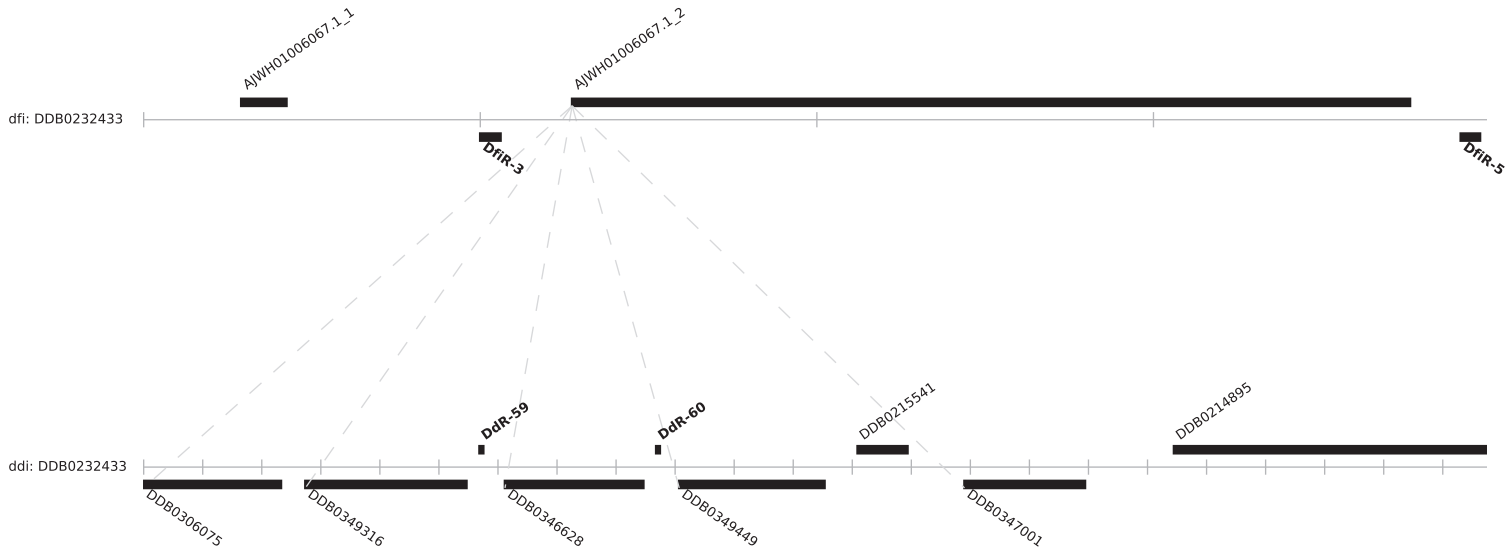

dfi: DDB0232430

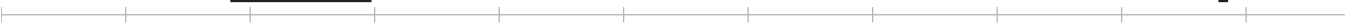

AJWH01002102.1\_2

AJWH01002102.1\_3

AJWH01002102.1\_4

DfIR-4

ddi: DDB0232430

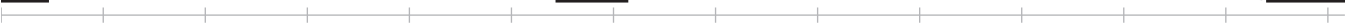

DDB0305703

DDB0231396

DDB0308705

DdR-46

DdR-25

DdR-47

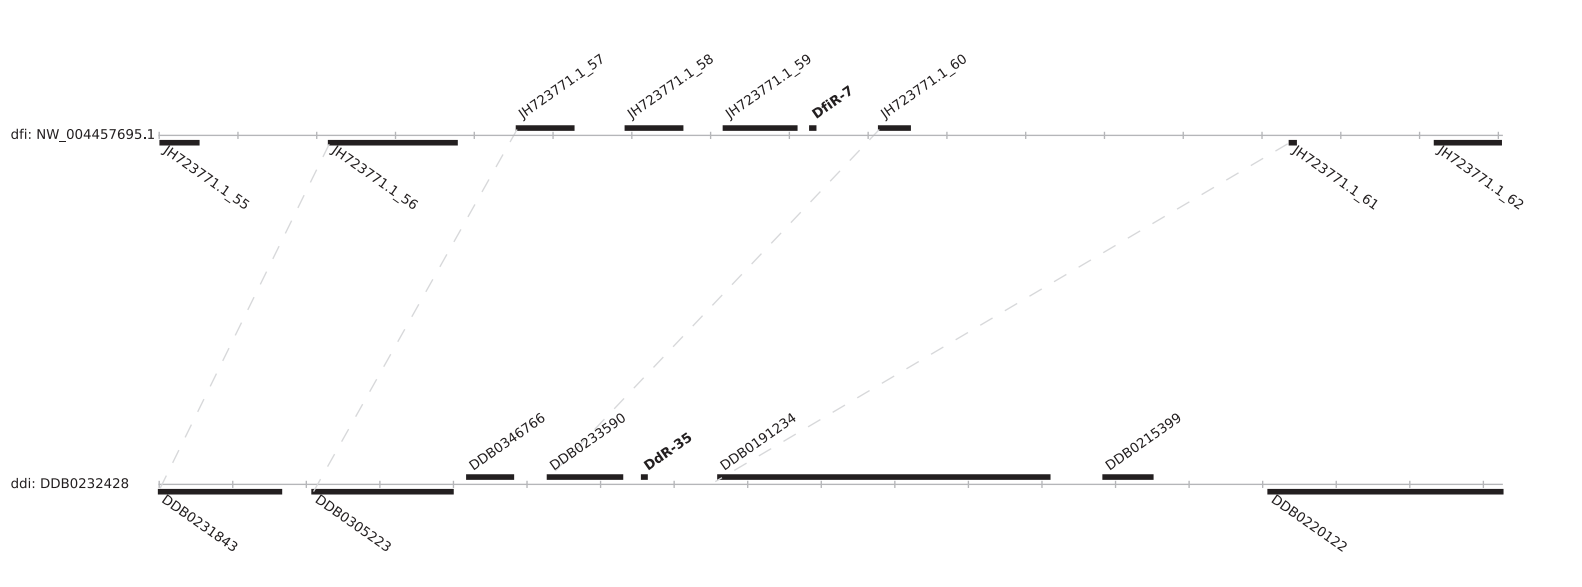

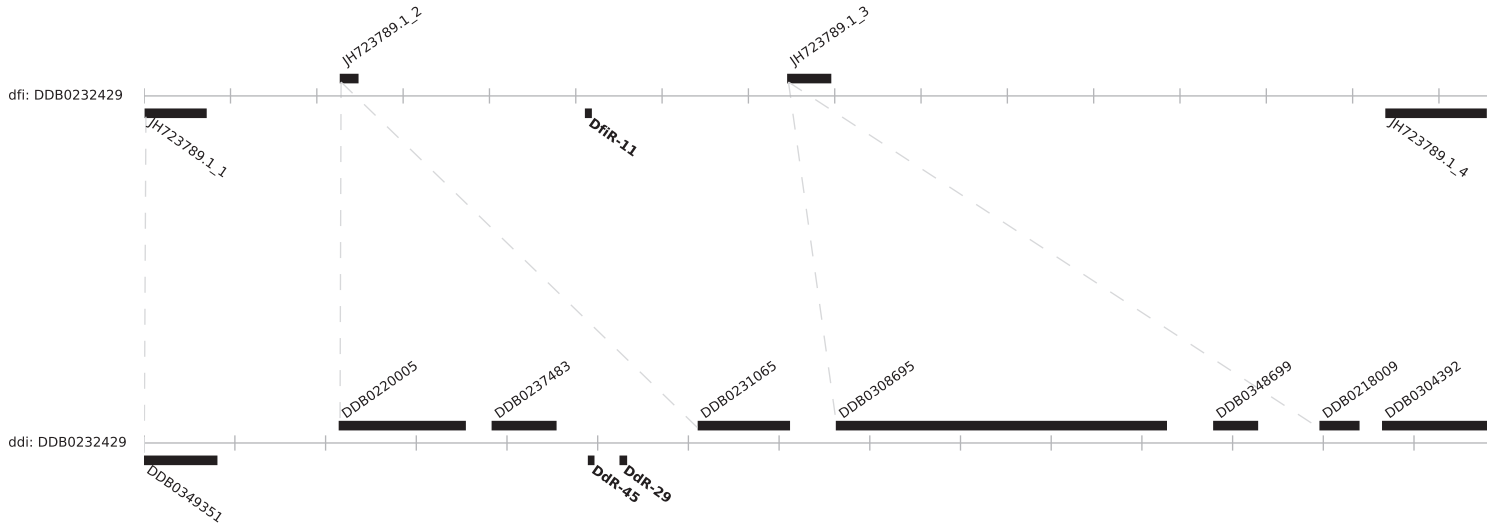

Supplement: Supplemental_Fig_S8.pdf [file Supplemental_Fig_S8.pdf]
